# Supplementary material
Source: PubMed Central journal article supplement (PMC2659597)
Supplement: NIHMS91174-supplement-1_si_001.pdf [file NIHMS91174-supplement-1_si_001.pdf]

**Supplementary Material for:**  
**Properties of Square-Pyramidal Alkyl-Thiolate Fe<sup>III</sup>-Complexes,  
Including an Analogue of the Unmodified Form of Nitrile Hydratase**

Priscilla Lugo-Mas, Wendy Taylor, Dirk Schweitzer, Roslyn M.  
Theisen, Liang Xu, Jason Shearer, Antonio DiPasquale, Werner  
Kaminsky, and \*Julie A. Kovacs

## I. Experimental Section. Ligand and Metal Complex Synthesis and Structural Characterization

### II. Supplementary Figures:

**Figure S-1.**  $^{13}\text{C}$  NMR( $\text{CDCl}_3$ ) of 2-benzylsulfanylmethyl-2-methyl-propane-1,3-diol (**7**).

**Figure S-2.**  $^{13}\text{C}$  NMR( $\text{CDCl}_3$ ) of (3-azido-2-azidomethyl-2-methyl-propylsulfanylmethyl)-benzene (**8**).

**Figure S-3.**  $^{13}\text{C}$  NMR( $\text{CDCl}_3$ ) of 2-benzylsulfanyl-2-methyl propionic acid (**11**).

**Figure S-4a-c.**  $^{13}\text{C}$  NMR( $\text{CDCl}_3$ ) of benzyl-protected (Tame- $\text{N}_2\text{S}_3$ ) (**13**).

**Figure S-5.**  $^1\text{H}$  NMR of tame- $(\text{NH})_2(\text{SH})_3$  (**14**) ligand in  $\text{CDCl}_3$ .

**Figure S-6.**  $^1\text{H}$  NMR of deuterated tame- $(\text{ND})_2(\text{SD})_3$  (**14**) ligand in  $\text{CDCl}_3$ .

**Figure S-7.** IR spectrum of tame- $(\text{NH})_2(\text{SH})_3$  (**14**) ligand, showing the  $\nu_{\text{SH}}$  stretch at  $2544\text{ cm}^{-1}$ .

**Figure S-8.** ESI mass spec of tame- $(\text{NH})_2(\text{SH})_3$  (**14**) ligand.

**Figure S-9.** Electronic absorption spectrum of  $[\text{Fe}^{\text{III}}((\text{tame}-\text{N}_3)\text{S}_2^{\text{Me}2})](\text{PF}_6)\cdot\text{BzCN}$  (**1**) in MeCN at ambient temperature.

**Figure S-10.** Electronic absorption spectrum of pyridine-bound  $(\text{Me}_4\text{N})[\text{Fe}^{\text{III}}((\text{Et}-\text{N}_2)\text{S}_2^{\text{Me}2})(\text{Py})]\cdot 2\text{MeOH}$  (**3**) in pyridine at ambient temperature.

**Figure S-11.** Electronic absorption spectrum of red tris-thiolate ligated  $(\text{NMe}_4)_2[\text{Fe}^{\text{III}}((\text{tame}-\text{N}_2\text{S})\text{S}_2^{\text{Me}2})]\cdot\text{MeCN}$  (**15**) in MeCN at ambient temperature.

**Figure S-12.** Conversion of dimeric  $[\text{Fe}^{\text{III}}((\text{Et}-\text{N}_2)\text{S}_2^{\text{Me}2})]_2^{2-}$  (**2**) to monomeric  $[\text{Fe}^{\text{III}}((\text{Et}-\text{N}_2)\text{S}_2^{\text{Me}2})(\text{Py})]^{1-}$  (**3**) via the addition of 1-6 equiv pyridine in  $\text{CH}_2\text{Cl}_2$  at ambient temperature.

**Figure S-13.** Low temperature (7 K) X-band EPR spectrum (black) of  $(\text{Me}_4\text{N})[\text{Fe}^{\text{III}}((\text{Et}-\text{N}_2)\text{S}_2^{\text{Me}2})(\text{Py})]\cdot 2\text{MeOH}$  (**3**) in MeOH/EtOH (9:1) glass, fitted (red) to  $E/D = 0.065$ .

**Figure S-14.** Low temperature (7 K) X-band EPR spectrum (black) of dimeric  $(\text{NMe}_4)_2[\text{Fe}^{\text{III}}((\text{Et}-\text{N}_2)\text{S}_2^{\text{Me}2})]_2\cdot 2\text{MeOH}$  (**2**) in MeOH:EtOH (9:1) glass fitted (red) to  $E/D = 0.092$ .

**Figure S–15.** Inverse molar magnetic susceptibility ( $1/\chi_m$ ) vs. temperature (T) plot for monomeric  $[\text{Fe}^{\text{III}}(\text{tame-N}_3\text{S}_2^{\text{Me}_2})](\text{PF}_6)\cdot\text{BzCN}$  (**1**) fit to an  $S=3/2$  spin-state.

**Figure S–16.** Low temperature (7 K) X-band EPR spectrum (black) of  $[\text{Fe}^{\text{III}}(\text{tame-N}_3\text{S}_2^{\text{Me}_2})](\text{PF}_6)\cdot\text{BzCN}$  (**1**) in Me-THF glass, fitted (red) to  $E/D=0.185$ .

**Figure S–17.** Low temperature (7 K) X-band EPR spectrum of  $[\text{Fe}^{\text{III}}(\text{tame-N}_3\text{S}_2^{\text{Me}_2})](\text{PF}_6)\cdot\text{BzCN}$  (**1**) in MeOH/EtOH (9:1) coordinating solvent displaying a mixture of  $S=1/2$  and  $S=3/2$  spin-states.

**Figure S–18.** d-orbital splitting diagram showing how the spin-state influences the Lewis acidity of the vacant apical site, and depends on the parameter  $\Delta E$ .  $\pi$ -bonding in the xy plane shrinks  $\Delta E$  favoring an  $S=3/2$  state. Oxygenation of the equatorial sulfurs would cause a spin-state change by diminishing the Fe–S  $\pi$ -interaction, increasing metal ion Lewis acidity, and consequently decreasing in the apical Fe–S bond length.

**Figure S–19.** Cyclic voltammogram of  $(\text{Me}_4\text{N})[\text{Fe}^{\text{III}}(\text{Et-N}_2\text{S}_2^{\text{Me}_2})(\text{Py})]\cdot 2\text{MeOH}$  (**3**) in pyridine at 298 K (0.1 M  $(\text{Bu}_4\text{N})\text{PF}_6$ , glassy carbon electrode, 150 mV/sec scan rate). Peak potentials versus SCE indicated.

**Figure S–20.** Vibrational (IR) spectrum of  $[\text{Fe}^{\text{II}}(\text{tame-N}_3\text{S}_2^{\text{Me}_2})(\text{CO})]\cdot\text{MeCN}$  (**16**) (KBr pellet) showing the  $\nu_{\text{CO}}$  and  $\nu_{\text{C=N}}$  stretches.

**Figure S–21.** Vibrational (IR) spectrum of  $[\text{Fe}^{\text{III}}(\text{tame-N}_3\text{S}_2^{\text{Me}_2})(\text{NO})](\text{PF}_6)\cdot\text{MeCN}$  (**18**) (KBr pellet) showing the  $\nu_{\text{NO}}$  and  $\nu_{\text{C=N}}$  stretches.

**Figure S–22.** Diamagnetic  $^1\text{H-NMR}$  of  $[\text{Fe}^{\text{III}}(\text{tame-N}_3\text{S}_2^{\text{Me}_2})(\text{NO})](\text{PF}_6)\cdot\text{MeCN}$  (**18**).

**Figure S–23.** ORTEP diagram of tris-thiolate ligated  $[\text{Fe}^{\text{III}}(\text{tame-N}_2\text{SS}_2^{\text{Me}_2})]^{2-}\cdot 3\text{H}_2\text{O}$  (**15b** $\cdot 3\text{H}_2\text{O}$ ) showing one of the two dianionic iron complexes contained in the unit cell, and three H-bonded co-crystallized  $\text{H}_2\text{O}$ 's with H-bonding metrical parameters of:  $\text{O}(1)\cdots\text{H}(52)(\text{H}_2\text{O})=2.010\text{ \AA}$ ;  $\text{O}(1)-\text{H}(52)-\text{O}(5)=163.3^\circ$ ;  $\text{O}(2)\cdots\text{H}(72)(\text{H}_2\text{O})=2.049\text{ \AA}$ ;  $\text{O}(2)-\text{H}(72)-\text{O}(7)=176.1^\circ$ ;  $\text{O}(3)\cdots\text{H}(61)(\text{H}_2\text{O})=1.998\text{ \AA}$ ;  $\text{O}(3)-\text{H}(61)-\text{O}(6)=169.0^\circ$ .

**Figure S–24.** Inverse molar magnetic susceptibility ( $1/\chi_m$ ) vs. temperature (T) plot for  $(\text{Et}_4\text{N})_2[\text{Fe}^{\text{III}}(\text{tame-N}_2\text{SO}_2\text{S}_2^{\text{Me}_2})]$  (**20**) fit to an  $S=3/2$  spin-state.

**Figure S–25.** Low temperature (7 K) X-band EPR spectrum (black) of  $(\text{Et}_4\text{N})_2[\text{Fe}^{\text{III}}(\text{tame-N}_2\text{SO}_2\text{S}_2^{\text{Me}_2})]$  (**20**) in 9:1 MeOH/EtOH glass, fitted (red) to  $E/D=0.085$ .

### **Supplementary Tables:**

- Table S-1.** Crystal Data, Intensity Collection, and Structure Refinement Parameters for  $[\text{Fe}^{\text{III}}(\text{tame-N}_3)\text{S}_2^{\text{Me}_2}](\text{PF}_6)\cdot\text{BzCN}$  (**1**),  $(\text{NMe}_4)_2[\text{Fe}^{\text{III}}(\text{Et-N}_2\text{S}_2^{\text{Me}_2})]_2\cdot 2\text{MeOH}$  (**2**),  $(\text{Me}_4\text{N})[\text{Fe}^{\text{III}}(\text{N}_2\text{-Et})\text{S}_2^{\text{Me}_2}(\text{Py})]\cdot 2\text{MeOH}$  (**3**),  $(\text{NMe}_4)_2[\text{Fe}^{\text{III}}(\text{tame-N}_2\text{S})\text{S}_2^{\text{Me}_2}]\cdot\text{MeCN}$  (**15**),  $[\text{Fe}^{\text{II}}(\text{tame-N}_3)\text{S}_2^{\text{Me}_2}(\text{CO})]\cdot\text{MeCN}$  (**16**),  $[\text{Fe}^{\text{III}}(\text{tame-N}_3)\text{S}_2^{\text{Me}_2}(\text{NO})](\text{PF}_6)\cdot\text{MeCN}$  (**18**), and  $[\text{Fe}^{\text{III}}((\text{tame-N}_3)\text{S}_2^{\text{Me}_2})(\text{MeCN})](\text{PF}_6)\cdot\text{MeCN}$  (**19**), and  $(\text{NEt}_4)_2[\text{Fe}^{\text{III}}(\text{tame-N}_2\text{SO}_2)\text{S}_2^{\text{Me}_2}]\cdot\text{MeCN}$  (**20**).
- Table S-2.** Selected bond distances (Å) and bond angles (deg) for Five-Coordinate  $[\text{Fe}^{\text{III}}(\text{tame-N}_3)\text{S}_2^{\text{Me}_2}](\text{PF}_6)\cdot\text{BzCN}$  (**1**),  $(\text{NMe}_4)_2[\text{Fe}^{\text{III}}(\text{Et-N}_2\text{S}_2^{\text{Me}_2})]_2\cdot 2\text{MeOH}$  (**2**),  $(\text{Me}_4\text{N})[\text{Fe}^{\text{III}}(\text{Et-N}_2\text{S}_2^{\text{Me}_2})(\text{Py})]\cdot 2\text{MeOH}$  (**3**),  $(\text{NMe}_4)_2[\text{Fe}^{\text{III}}((\text{tame-N}_2\text{S})\text{S}_2^{\text{Me}_2})]\cdot\text{MeCN}$  (**15**) and  $(\text{NEt}_4)_2[\text{Fe}^{\text{III}}((\text{tame-N}_2\text{SO}_2)\text{S}_2^{\text{Me}_2})]\cdot\text{MeCN}$  (**20**).
- Table S-3.** Selected Bond Distances (Å) and Angles (deg) for oxidized  $[\text{Fe}^{\text{III}}(\text{tame-N}_3)\text{S}_2^{\text{Me}_2}]^+$  (**1**),  $[\text{Fe}^{\text{III}}(\text{tame-N}_3)\text{S}_2^{\text{Me}_2}(\text{NO})]^+$  (**18**), and  $[\text{Fe}^{\text{III}}(\text{N}_3(\text{tame})\text{S}_2^{\text{Me}_2})(\text{MeCN})]^+$  (**19**). And reduced  $[\text{Fe}^{\text{II}}(\text{tame-N}_3)\text{S}_2^{\text{Me}_2}(\text{CO})]$  (**16**).
- Table S-4.** Crystal Data for  $[\text{Fe}^{\text{III}}((\text{tame-N}_3)\text{S}_2^{\text{Me}_2})](\text{PF}_6)\cdot\text{BzCN}$  (**1**)
- Table S-5.** Positional and Equivalent Isotropic Thermal Parameters for  $[\text{Fe}^{\text{III}}((\text{tame-N}_3)\text{S}_2^{\text{Me}_2})](\text{PF}_6)\cdot\text{BzCN}$  (**1**).
- Table S-6.** Bond Distances (Å) and Angles (deg) for  $[\text{Fe}^{\text{III}}((\text{tame-N}_3)\text{S}_2^{\text{Me}_2})](\text{PF}_6)\cdot\text{BzCN}$  (**1**).
- Table S-7.** Anisotropic Thermal Parameters for  $[\text{Fe}^{\text{III}}((\text{tame-N}_3)\text{S}_2^{\text{Me}_2})](\text{PF}_6)\cdot\text{BzCN}$  (**1**).
- Table S-8.** Hydrogen Atoms for  $[\text{Fe}^{\text{III}}((\text{tame-N}_3)\text{S}_2^{\text{Me}_2})](\text{PF}_6)\cdot\text{BzCN}$  (**1**).
- Table S-9.** Crystal Data for  $(\text{NMe}_4)_2[\text{Fe}^{\text{III}}((\text{Et-N}_2)\text{S}_2^{\text{Me}_2})]_2\cdot 2\text{MeOH}$  (**2**)
- Table S-10.** Positional and Equivalent Isotropic Thermal Parameters for  $(\text{NMe}_4)_2[\text{Fe}^{\text{III}}((\text{Et-N}_2)\text{S}_2^{\text{Me}_2})]_2\cdot 2\text{MeOH}$  (**2**)
- Table S-11.** Bond Distances (Å) and Angles (deg) for  $(\text{NMe}_4)_2[\text{Fe}^{\text{III}}((\text{Et-N}_2)\text{S}_2^{\text{Me}_2})]_2\cdot 2\text{MeOH}$  (**2**)
- Table S-12.** Anisotropic Thermal Parameters for  $(\text{NMe}_4)_2[\text{Fe}^{\text{III}}((\text{Et-N}_2)\text{S}_2^{\text{Me}_2})]_2\cdot 2\text{MeOH}$  (**2**)
- Table S-13.** Hydrogen Atoms for  $(\text{NMe}_4)_2[\text{Fe}^{\text{III}}((\text{Et-N}_2)\text{S}_2^{\text{Me}_2})]_2\cdot 2\text{MeOH}$  (**2**)
- Table S-14.** Crystal Data for  $(\text{Me}_4\text{N})[\text{Fe}^{\text{III}}((\text{Et-N}_2)\text{S}_2^{\text{Me}_2})(\text{Py})]\cdot 2\text{MeOH}$  (**3**)
- Table S-15.** Positional and Equivalent Isotropic Thermal Parameters for  $(\text{Me}_4\text{N})[\text{Fe}^{\text{III}}((\text{Et-N}_2)\text{S}_2^{\text{Me}_2})(\text{Py})]\cdot 2\text{MeOH}$  (**3**)
- Table S-16.** Bond Distances (Å) and Angles (deg) for  $(\text{Me}_4\text{N})[\text{Fe}^{\text{III}}((\text{Et-N}_2)\text{S}_2^{\text{Me}_2})(\text{Py})]\cdot 2\text{MeOH}$  (**3**)
- Table S-17.** Anisotropic Thermal Parameters for  $(\text{Me}_4\text{N})[\text{Fe}^{\text{III}}((\text{Et-N}_2)\text{S}_2^{\text{Me}_2})(\text{Py})]\cdot 2\text{MeOH}$  (**3**)
- Table S-18.** Hydrogen Atoms for  $(\text{Me}_4\text{N})[\text{Fe}^{\text{III}}((\text{Et-N}_2)\text{S}_2^{\text{Me}_2})(\text{Py})]\cdot 2\text{MeOH}$  (**3**)
- Table S-19.** Crystal Data for  $(\text{NMe}_4)_2[\text{Fe}^{\text{III}}((\text{tame-N}_2\text{S})\text{S}_2^{\text{Me}_2})]\cdot\text{MeCN}$  (**15**)
- Table S-20.** Positional and Equivalent Isotropic Thermal Parameters for  $(\text{NMe}_4)_2[\text{Fe}^{\text{III}}((\text{tame-N}_2\text{S})\text{S}_2^{\text{Me}_2})]\cdot\text{MeCN}$  (**15**)

- Table S–21.** Bond Distances (Å) and Angles (deg) for  $(\text{NMe}_4)_2[\text{Fe}^{\text{III}}((\text{tame}-\text{N}_2\text{S})\text{S}_2^{\text{Me}_2})]\cdot\text{MeCN}$  (**15**)
- Table S–22.** Anisotropic Thermal Parameters for  $(\text{NMe}_4)_2[\text{Fe}^{\text{III}}((\text{tame}-\text{N}_2\text{S})\text{S}_2^{\text{Me}_2})]\cdot\text{MeCN}$  (**15**)
- Table S–23.** Hydrogen Atoms for  $(\text{NMe}_4)_2[\text{Fe}^{\text{III}}((\text{tame}-\text{N}_2\text{S})\text{S}_2^{\text{Me}_2})]\cdot\text{MeCN}$  (**15**)
- Table S–24.** Crystal Data for  $[\text{Fe}^{\text{II}}((\text{tame}-\text{N}_3)\text{S}_2^{\text{Me}_2})(\text{CO})]\cdot\text{MeCN}$  (**16**)
- Table S–25.** Positional and Equivalent Isotropic Thermal Parameters for  $[\text{Fe}^{\text{II}}((\text{tame}-\text{N}_3)\text{S}_2^{\text{Me}_2})(\text{CO})]\cdot\text{MeCN}$  (**16**)
- Table S–26.** Bond Distances (Å) and Angles (deg) for  $[\text{Fe}^{\text{II}}((\text{tame}-\text{N}_3)\text{S}_2^{\text{Me}_2})(\text{CO})]\cdot\text{MeCN}$  (**16**)
- Table S–27.** Anisotropic Thermal Parameters for  $[\text{Fe}^{\text{II}}((\text{tame}-\text{N}_3)\text{S}_2^{\text{Me}_2})(\text{CO})]\cdot\text{MeCN}$  (**16**)
- Table S–28.** Hydrogen Atoms for  $[\text{Fe}^{\text{II}}((\text{tame}-\text{N}_3)\text{S}_2^{\text{Me}_2})(\text{CO})]\cdot\text{MeCN}$  (**16**)
- Table S–29.** Crystal Data for  $[\text{Fe}^{\text{III}}((\text{tame}-\text{N}_3)\text{S}_2^{\text{Me}_2})(\text{NO})](\text{PF}_6)\cdot\text{MeCN}$  (**18**)
- Table S–30.** Positional and Equivalent Isotropic Thermal Parameters for  $[\text{Fe}^{\text{III}}((\text{tame}-\text{N}_3)\text{S}_2^{\text{Me}_2})(\text{NO})](\text{PF}_6)\cdot\text{MeCN}$  (**18**)
- Table S–31.** Bond Distances (Å) and Angles (deg) for  $[\text{Fe}^{\text{III}}((\text{tame}-\text{N}_3)\text{S}_2^{\text{Me}_2})(\text{NO})](\text{PF}_6)\cdot\text{MeCN}$  (**18**)
- Table S–32.** Anisotropic Thermal Parameters for  $[\text{Fe}^{\text{III}}((\text{tame}-\text{N}_3)\text{S}_2^{\text{Me}_2})(\text{NO})](\text{PF}_6)\cdot\text{MeCN}$  (**18**)
- Table S–33.** Hydrogen Atoms for  $[\text{Fe}^{\text{III}}((\text{tame}-\text{N}_3)\text{S}_2^{\text{Me}_2})(\text{NO})](\text{PF}_6)\cdot\text{MeCN}$  (**18**)
- Table S–34.** Crystal Data for  $[\text{Fe}^{\text{III}}((\text{tame}-\text{N}_3)\text{S}_2^{\text{Me}_2})(\text{MeCN})](\text{PF}_6)\cdot\text{MeCN}$  (**19**).
- Table S–35.** Positional and Equivalent Isotropic Thermal Parameters for  $[\text{Fe}^{\text{III}}((\text{tame}-\text{N}_3)\text{S}_2^{\text{Me}_2})(\text{MeCN})](\text{PF}_6)\cdot\text{MeCN}$  (**19**).
- Table S–36.** Bond Distances (Å) and Angles (deg) for  $[\text{Fe}^{\text{III}}((\text{tame}-\text{N}_3)\text{S}_2^{\text{Me}_2})(\text{MeCN})](\text{PF}_6)\cdot\text{MeCN}$  (**19**).
- Table S–37.** Anisotropic Thermal Parameters for  $[\text{Fe}^{\text{III}}((\text{tame}-\text{N}_3)\text{S}_2^{\text{Me}_2})(\text{MeCN})](\text{PF}_6)\cdot\text{MeCN}$  (**19**).
- Table S–38.** Hydrogen Atoms for  $[\text{Fe}^{\text{III}}((\text{tame}-\text{N}_3)\text{S}_2^{\text{Me}_2})(\text{MeCN})](\text{PF}_6)\cdot\text{MeCN}$  (**19**).
- Table S–39.** Crystal Data for  $(\text{NEt}_4)_2[\text{Fe}^{\text{III}}((\text{tame}-\text{N}_2\text{S})\text{S}_2^{\text{Me}_2})]\cdot 3\text{H}_2\text{O}$  (**15a**)
- Table S–40.** Positional and Equivalent Isotropic Thermal Parameters for  $(\text{NEt}_4)_2[\text{Fe}^{\text{III}}((\text{tame}-\text{N}_2\text{S})\text{S}_2^{\text{Me}_2})]\cdot 3\text{H}_2\text{O}$  (**15a**)
- Table S–41.** Bond Distances (Å) and Angles (deg) for  $(\text{NEt}_4)_2[\text{Fe}^{\text{III}}((\text{tame}-\text{N}_2\text{S})\text{S}_2^{\text{Me}_2})]\cdot 3\text{H}_2\text{O}$  (**15a**)
- Table S–42.** Anisotropic Thermal Parameters for  $(\text{NEt}_4)_2[\text{Fe}^{\text{III}}((\text{tame}-\text{N}_2\text{S})\text{S}_2^{\text{Me}_2})]\cdot 3\text{H}_2\text{O}$  (**15a**)
- Table S–43.** Hydrogen Atoms for  $(\text{NEt}_4)_2[\text{Fe}^{\text{III}}((\text{tame}-\text{N}_2\text{S})\text{S}_2^{\text{Me}_2})]\cdot 3\text{H}_2\text{O}$  (**15a**)
- Table S–44.** Crystal Data for  $(\text{NEt}_4)_2[\text{Fe}^{\text{III}}((\text{tame}-\text{N}_2\text{SO}_2)\text{S}_2^{\text{Me}_2})]\cdot\text{MeCN}$  (**20**)
- Table S–45.** Positional and Equivalent Isotropic Thermal Parameters for  $(\text{NEt}_4)_2[\text{Fe}^{\text{III}}((\text{tame}-\text{N}_2\text{SO}_2)\text{S}_2^{\text{Me}_2})]\cdot\text{MeCN}$  (**20**)

**Table S-46.** Bond Distances (Å) and Angles (deg) for  $(\text{NEt}_4)_2[\text{Fe}^{\text{III}}((\text{tame}-\text{N}_2\text{SO}_2)\text{S}_2^{\text{Me}_2})]\cdot\text{MeCN}$  (**20**)

**Table S-47.** Anisotropic Thermal Parameters for  $(\text{NEt}_4)_2[\text{Fe}^{\text{III}}((\text{tame}-\text{N}_2\text{SO}_2)\text{S}_2^{\text{Me}_2})]\cdot\text{MeCN}$  (**20**)

**Table S-48.** Hydrogen Atoms for  $(\text{NEt}_4)_2[\text{Fe}^{\text{III}}((\text{tame}-\text{N}_2\text{SO}_2)\text{S}_2^{\text{Me}_2})]\cdot\text{MeCN}$  (**20**)

## Experimental Section

**General Methods.** All reactions were performed under an atmosphere of dinitrogen in a glove box or using standard Schlenk techniques, or using a custom-made solution cell equipped with a threaded glass connector sized to fit a dip probe. Reagents purchased from commercial vendors were of the highest purity available and used without further purification. The carboxamide ligand *N,N'*-1,2-ethane-diylbis(2-mercapto-2-methyl-propanamide) ( $S_2^{Me_2}N_2^{amide}-H_4$ ) was synthesized as previously described.<sup>34</sup> Toluene, tetrahydrofuran (THF), diethyl ether (Et<sub>2</sub>O), and acetonitrile (MeCN) were rigorously degassed and purified using solvent purification columns housed in a custom stainless steel cabinet, dispensed via a stainless steel schlenk-line (GlassContour). Methanol (MeOH) and ethanol (EtOH) were distilled from magnesium methoxide or ethoxide and degassed prior to use. Methylene chloride (DCM) was distilled from CaH<sub>2</sub> and degassed prior to use. DMF was distilled from 4 Å molecular sieves and degassed prior to use. <sup>1</sup>H NMR spectra were recorded on Bruker AV 301, Bruker AV 500, or Bruker DRX 499 FT-NMR spectrometers and are referenced to an external standard of TMS (paramagnetic compounds) or to residual protio-solvent (diamagnetic compounds). Chemical shifts are reported in ppm and coupling constants (*J*) are in Hz. EPR spectra were recorded on a Bruker EPX CW-EPR spectrometer operating at X-band frequency at 7 K. EPR spectra were fit using the program EasySpin for Matlab. IR spectra were recorded on a Perkin-Elmer 1700 FT-IR spectrometer as KBr pellets. Cyclic voltammograms were recorded in MeCN, MeOH, or DMF (100–900 mM Bu<sup>n</sup><sub>4</sub>N(PF<sub>6</sub>) solutions) on a PAR 273 potentiostat utilizing a glassy carbon working electrode, platinum auxiliary electrode, and an SCE reference electrode. Magnetic

moments (solution state) were obtained using the Evans' method as modified for superconducting solenoids.<sup>35,36</sup> Temperatures were obtained using Van Geet's method.<sup>37</sup> Solid state magnetic measurements were obtained with polycrystalline samples in gel-caps using a Quantum Design MPMS S5 SQUID magnetometer. Ambient temperature electronic absorption spectra were recorded on a Hewlett-Packard Model 8450 spectrometer, interfaced to an IBM PC. Low temperature electronic absorption spectra were recorded using a Varian Cary 50 spectrophotometer equipped with a fiber optic cable connected to a "dip" ATR probe (C-technologies), with a custom-built two-neck solution sample holder equipped with a threaded glass connector (sized to fit the dip probe). Elemental Analyses were performed by Galbraith Labs (Knoxville, TN), Atlantic Microlabs (Norcross, GA) or Canadian Microanalytical Service Ltd. (Delta, BC). 3-methyl-3mercapto-2-butanone was synthesized as previously described.<sup>21</sup>

**Synthesis of  $[\text{Fe}^{\text{III}}(\text{tame-N}_3)\text{S}_2^{\text{Me}_2}](\text{PF}_6)\cdot\text{BzCN}$  (**1**).** Two equivalents of 3-methyl-3-mercapto-2-butanone (1.17 g, 10 mmol) were combined with two equiv. of NaOMe, one equiv of 1,1,1-tris(aminomethyl)ethane (tame)<sup>40</sup> (0.59 g, 5 mmol) and one equiv of anhydrous  $\text{FeCl}_2$  (0.64 g, 5 mmol) in 50 mL of MeOH. Oxidation with  $\text{Cp}_2\text{FePF}_6$  (0.66 g, 5 mmol), followed by filtration, solvent removal under vacuum,  $\text{Et}_2\text{O}$  extraction to remove  $\text{Cp}_2\text{Fe}$ , and recrystallization from PhCN/ $\text{Et}_2\text{O}$ , afforded 1.24 g (41 % yield) of **1**. Electronic absorption (MeCN):  $\lambda_{\text{max}}$  ( $\epsilon$ ): 400 (3380), 540 (1300) nm. IR (KBr pellet)  $\nu(\text{cm}^{-1})$ : 1618 (C=N).  $E_{1/2}$  (MeCN) = -650 mV vs SCE. Solution magnetic moment (299 K; MeOH)  $\mu_{\text{eff}} = 3.74$  BM. EPR (Me-THF, 7 K):  $g_1 = 4.88$ ,  $g_2 = 2.60$ ,  $g_3 = 1.71$ . ESI-MS calcd for  $[\text{FeC}_{13}\text{H}_{21}\text{N}_2\text{O}_2\text{S}_3]^{2-}$ : 389.4, found 389.3. Anal. calcd. for  $\text{C}_{15}\text{H}_{29}\text{FeN}_3\text{S}_2\text{PF}_6$ : C, 34.89; H, 5.66; N, 8.14. Found: C, 34.82; H, 5.79; N, 8.04.



**Synthesis of Dimeric  $(\text{NMe}_4)_2[\text{Fe}^{\text{III}}(\text{Et-N}_2\text{S}_2^{\text{Me}_2})]_2 \cdot 2\text{MeOH}$  (2).**  $\text{N,N}'$ -1,2-Ethanediyldis[2-mercapto-2-methyl-propanamide] (400 mg, 1.513 mmol) was dissolved in ~ 10 ml MeOH, and NaOH (242 mg, 6.052 mmol), dissolved in 10 mL of MeOH was then added. Once all of the NaOH was dissolved, the deprotonated ligand was added to a solution consisting of  $\text{NMe}_4\text{FeCl}_4$  (411 mg, 1.513 mmol) dissolved in MeOH (~15 mL). After stirring for 3 h, the solvent was removed from the intensely colored brown solution, the residue was washed with  $\text{Et}_2\text{O}$ , and then redissolved MeOH/ $\text{Et}_2\text{O}$  (1:1; ~ 60 mL), and filtered to remove insoluble impurities. After removal of the solvent under vacuum, the residue was then dissolved in 10 mL of MeOH, and layered with  $\text{Et}_2\text{O}$  (110 mL) and cooled to - 35 °C for several days. After the mother liquid was decanted, the remaining black crystalline solid (440 mg, 0.52 mmol, 69% yield) was washed by suspending it several times in  $\text{Et}_2\text{O}$  and dried under high vacuum. Electronic absorption (MeOH):  $\lambda_{\text{max}}$  ( $\epsilon$ ): 208 (38000), 301 (16400), 420 (5700), 465 (6000) nm; (MeCN):  $\lambda_{\text{max}}$  ( $\epsilon$ ): 306 (7500), 497 (3000) nm. IR (KBr pellet)  $\nu(\text{cm}^{-1})$ : 1550 (C=O), 1583 (C=O).  $E_{1/2}$  (MeCN) = -1.13 V vs SCE. Solution magnetic moment (304 K; MeOH)  $\mu_{\text{eff}} = 4.01$  BM. EPR (MeOH/EtOH glass (9:1), 7 K):  $g_{\perp} = 4.35$ ,  $g_{\parallel} = 2.00$ . ESI-MS calcd for  $[\text{FeC}_{13}\text{H}_{21}\text{N}_2\text{O}_2\text{S}_3]^{2-}$ : 389.4, found 389.3. Anal. calcd. for  $\text{C}_{28}\text{H}_{56}\text{N}_6\text{Fe}_2\text{O}_4\text{S}_4 \cdot 3 \text{MeOH}$ : C, 42.46; H, 7.82; N, 9.58. Found: C, 42.09; H, 7.65; N, 9.51.

**Synthesis of Monomeric  $(\text{Me}_4\text{N})[\text{Fe}^{\text{III}}(\text{Et-N}_2\text{S}_2^{\text{Me}_2})(\text{Py})] \cdot 2\text{MeOH}$  (3).** In the glove box, **2** (140 mg, 0.1657 mmol) was dissolved in 15 mL of a 2:1 MeOH/pyridine mixture. The solution was layered with 100 mL of  $\text{Et}_2\text{O}$  and placed in a -35 °C refrigerator. After standing for several days at -35 °C, the mother liquor was decanted and the remaining brown crystals (0.090 g, 0.1687 mmol, 51% yield) were washed by suspending them several times in  $\text{Et}_2\text{O}$  and dried under high vacuum. Electronic absorption (pyridine):  $\lambda_{\text{max}}$  ( $\epsilon$ ): 309 (8000), 415 (2600), 494

(4800) nm. IR (KBr pellet)  $\nu(\text{cm}^{-1})$ : 1576 (C=O).  $E_{1/2}$  (pyridine) = -1.34 V vs SCE. Solution magnetic moment (304 K; MeOH)  $\mu_{\text{eff}} = 3.72$  BM. EPR (MeOH/EtOH glass (9:1), 7 K):  $g_{\perp} = 4.45$ ,  $g_{\parallel} = 1.97$ . ESI-MS calcd for  $[\text{FeC}_{13}\text{H}_{21}\text{N}_2\text{O}_2\text{S}_3]^{2-}$ : 389.4, found 389.3. Anal. Calcd for  $\text{C}_{19}\text{H}_{33}\text{N}_4\text{FeO}_2\text{S}_2 \cdot 1/2 \text{ MeOH}$ : C, 48.24; H, 7.27; N, 11.54. Found: C, 47.87; H, 7.15; N, 11.82.

**Synthesis of 2-bromomethyl-2-methyl-propane-1,3-diol (6).** To a stirred solution of (3-Methyl-oxetan-3-yl)-methanol (**5**, 17.0 mL, 170.4 mmol; Scheme 2) at ambient temperature was added HBr (25.1 mL of a 48% w/w solution in  $\text{H}_2\text{O}$ , 221.8 mmol). The reaction mixture was allowed to reflux overnight. Upon cooling to 4 °C, a white precipitate was obtained, which was washed with cold hexanes, filtered and dried to yield **6** (22.5 g, 122.9 mmol, 72%).  $^1\text{H}$  NMR ( $\text{CDCl}_3$ , 300 MHz):  $\delta$  3.70 (s, 4H), 3.58 (s, 2H), 2.23 (bs, 2H), 0.95 (s, 3H).

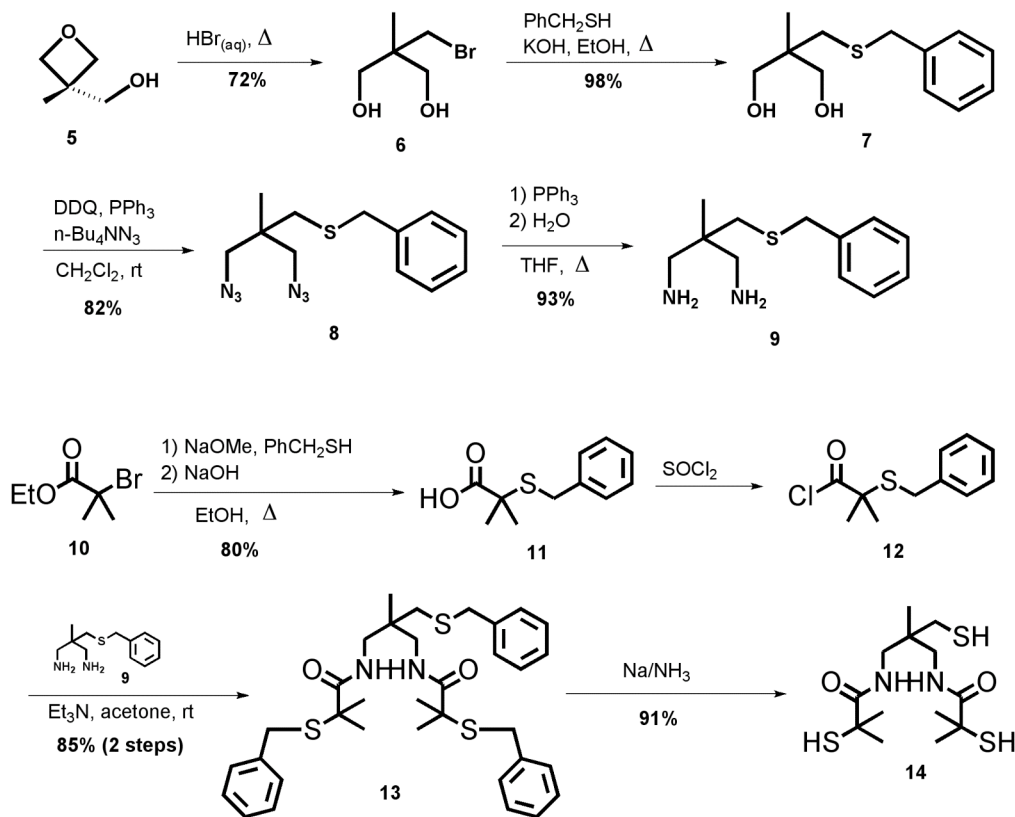

**Synthesis of 2-benzylsulfanylmethyl-2-methyl-propane-1,3-diol (7).** To a degassed ethanolic solution of benzyl mercaptan (14.0 mL, 119.2 mmol) was added KOH (6.7 g, 119.0 mmol) followed by **6** (21.8 g, 119.0 mmol; Scheme 2). The reaction mixture was refluxed for 20 h. The reaction mixture was concentrated, and suspended in acetone. KBr was filtered off, and acetone was removed *in vacuo*. The resulting solid was washed with water and cold hexanes to yield **7** (26.4 g, 116.7 mmol, 98%) as a white crystalline solid. <sup>1</sup>H NMR (CDCl<sub>3</sub>, 300 MHz): δ 7.36-7.27 (m, 5H), 3.76 (s, 2H), 3.58 (m, 4H), 2.63 (s, 2H), 2.06 (bs, 2H), 0.85 (s, 3H). <sup>13</sup>C NMR(CDCl<sub>3</sub>): δ 138.72, 129.10, 128.74, 127.31, 69.47, 40.67, 37.94, 36.83, 19.12. ESI-MS calcd for [C<sub>12</sub>H<sub>18</sub>SO<sub>2</sub> + Na]<sup>+</sup>: 249.3, found 249.1.

**Synthesis of (3-azido-2-azidomethyl-2-methyl-propylsulfanylmethyl)-benzene (8).** To a stirred solution of PPh<sub>3</sub> (338 mg, 1.3 mmol) and 2,3-dichloro-5,6-dicyano-1,4-benzoquinone (DDQ) (390 mg, 1.72 mmol) in dry CH<sub>2</sub>Cl<sub>2</sub> (5 mL) at ambient temperature was added tetra-*n*-butylammonium azide (488 mg, 1.72 mmol). After 5 min, **7** (194 mg, 858 μmol; Scheme 2) was added. The reaction mixture was allowed to stir overnight at ambient temperature. Solvent was evaporated under *vacuo*. The residue was purified by silica gel column chromatography (hexanes/ethyl acetate, 4:1, v/v) to yield **8** (194 mg, 703 μmol, 82%) as an orange oil. <sup>1</sup>H NMR (CDCl<sub>3</sub>, 300 MHz): δ 7.36-7.30 (m, 5H), 3.74 (s, 2H), 3.29 (dd, *J* = 12.0, 3.9 Hz, 4H), 2.45 (s, 2H), 0.99 (s, 3H). <sup>13</sup>C NMR (CDCl<sub>3</sub>): δ 138.16, 129.07, 128.72, 127.38, 57.01, 40.69, 38.15, 37.91, 20.63.

**Synthesis of 2-benzylsulfanylmethyl-2-methyl-propane-1,3-diamine (9).** To a stirred solution of **8** (1.0 g, 3.6 mmol; Scheme 2) in THF (20 mL) at ambient temperature was added triphenylphosphine (1.9 g, 7.2 mmol). The reaction mixture was heated at 60 °C overnight. After 12 h, H<sub>2</sub>O was added in excess and the reaction was stirred at 60 °C for an additional 3 h.

THF was removed under rotary evaporation. The aqueous solution was acidified with 1M HCl (5 mL) and extracted (3 x 5 mL) with Et<sub>2</sub>O to separate the Ph<sub>3</sub>P=O from the amine. The acidified aqueous layer was washed with 1M KOH (5 mL) and extracted (3 x 5 mL) with Et<sub>2</sub>O. The combined organic layers were washed with H<sub>2</sub>O and brine (5 mL each), dried over Na<sub>2</sub>SO<sub>4</sub>, and concentrated *in vacuo*. The combined organic layers were washed with H<sub>2</sub>O and brine (3 mL each), dried over Na<sub>2</sub>SO<sub>4</sub>, and concentrated *in vacuo*. The combined organic extract was concentrated to yield the product **9** (773 mg, 3.5 mmol, 93%) as a clear, colorless oil. <sup>1</sup>H NMR (CDCl<sub>3</sub>, 300 MHz): δ 7.34-7.32 (m, 5H), 3.72 (s, 2H), 2.62-2.53 (m, 4H), 2.46 (s, 2H), 1.29 (bs, 4H), 0.88 (s, 3H). ESI-MS calcd for [C<sub>12</sub>H<sub>20</sub>N<sub>2</sub>S + H]<sup>+</sup>: 225.3, found 225.1.

**Synthesis of 2-benzylsulfanyl-2-methyl propionic acid (11).** To a stirred solution of ethyl 2-bromo-2-methyl propionate (**10**, 15.0 mL, 102.5 mmol; Scheme 2) in EtOH (340 mL) was added NaOMe (5.5 g, 102.5 mmol) followed by benzyl mercaptan (12.0 mL, 102.2 mmol). After stirring at 90 °C for 3.5 h, NaOH (5.3 g, 133.3 mmol) was added. The reaction mixture was heated at 90 °C for an additional 5 h. The solution was filtered, and the solid recovered was washed with the minimum amount of EtOH. The solid was dissolved in H<sub>2</sub>O (25 mL), and concentrated HCl was added dropwise until the solution reached pH=2. After filtration, the solid was dried *in vacuo* overnight to afford **11** (17.3 g, 81.2, 80%) as a white powder. <sup>1</sup>H NMR (CDCl<sub>3</sub>, 301 MHz): δ 7.35-7.32 (m, 5H), 3.93 (s, 2H), 1.60 (s, 6H). <sup>13</sup>C NMR (CDCl<sub>3</sub>): δ 180.74, 137.13, 129.31, 128.71, 127.34, 47.69, 35.05, 25.51. ESI-MS calcd for [C<sub>11</sub>H<sub>14</sub>O<sub>2</sub>S + Na]<sup>+</sup>: 233.3, found 233.0.

**Synthesis of Benzyl-protected (Tame-N<sub>2</sub>S<sub>3</sub>) (13).** To a stirred solution of 2-benzylsulfanyl-2-methyl propionic acid (**11**, 3.1 g, 14.7 mmol; Scheme 2), placed in an ambient temperature H<sub>2</sub>O bath, was added thionyl chloride (5.4 mL, 73.5 mmol). After 30 min, the excess thionyl chloride

was removed under *vacuo*. The crude acid chloride derivative, 2-benzylsulfanyl-2-methyl-propionyl chloride (**12**), was used immediately in the next step without further purification.

To a stirred solution of 2-benzylsulfanyl-2-methyl-propionyl chloride (**12**; Scheme 2) (3.4 g, 14.7 mmol) in acetone (25 mL) at ambient temperature was added **9** (1.7 g, 7.4 mmol) followed by Et<sub>3</sub>N (6.1 mL, 44.1 mmol). After stirring for 6 h, saturated aqueous NH<sub>4</sub>Cl (20 mL) was added. The aqueous layer was extracted (3 x 20 mL) with Et<sub>2</sub>O. The combined organic layers were washed with H<sub>2</sub>O and brine (20 mL each), dried over Na<sub>2</sub>SO<sub>4</sub>, and concentrated *in vacuo* to yield **13** (3.8 g, 6.3 mmol, 85% (2 steps); Scheme 2) as a light yellow oil. <sup>1</sup>H NMR (CDCl<sub>3</sub>, 300 MHz): δ 7.53 (m, 2H), 7.32-7.23 (m, 15H), 3.77 (s, 4H), 3.71 (s, 2H), 3.20 (dd, *J* = 13.8, 7.8 Hz, 2H), 2.80 (dd, *J* = 14.0, 6.0 Hz, 2H), 2.37 (s, 2H), 1.58 (s, 6H), 1.54 (s, 6H), 0.92 (s, 3H). <sup>13</sup>C NMR (CDCl<sub>3</sub>): δ 175.36, 138.17, 137.35, 129.15, 128.99, 128.78, 128.73, 127.35, 127.29, 50.18, 44.43, 40.93, 37.87, 34.93, 27.19, 26.74, 20.87. ESI-MS calcd for [C<sub>34</sub>H<sub>44</sub>N<sub>2</sub>O<sub>2</sub>S<sub>3</sub> + H]<sup>+</sup>: 609.9, found 609.3.

**Synthesis of Tame–(NH)<sub>2</sub>(SH)<sub>3</sub> (**14**).** To a stirred solution of liquid ammonia (~50 mL), sodium metal (200 mg) was added to afford an intense blue solution. To this blue solution was added 1 mL aliquots of a solution of **13** (2.0 g, 3.3 mmol) dissolved in diethyl ether (5 mL). Additional sodium was periodically added in small proportions to maintain the deep blue color of the solution. The completion of the reaction was assumed once the solution maintained its deep blue color for more than 30 min. The reaction was then quenched with NH<sub>4</sub>Cl (200 mg), and the remaining liquid ammonia was evaporated under a stream of N<sub>2</sub>. The resulting solid was dissolved in MeOH (15 mL), and conc. HCl was then added until the solution reached pH=2. The solution was then concentrated *in vacuo*, redissolved in CH<sub>3</sub>CN (15 mL), then filtered, and the MeCN solvent evaporated under reduced pressure. The product was extracted from the

brown paste by stirring with Et<sub>2</sub>O, and the undesirable solids were then removed by filtration. After concentration of the Et<sub>2</sub>O solvent *in vacuo*, the resulting light yellow paste was triturated with hexanes, the solution decanted, and the remaining oily liquid dried under *vacuo* to yield **14** (1.0 g, 3.0 mmol, 91%) as a clear oil. <sup>1</sup>H NMR (CDCl<sub>3</sub>): δ 7.59 (m, 2H), 3.28 (dd, *J* = 14.0, 6.9 Hz, 2H), 3.01 (dd, *J* = 14.0, 6.6 Hz, 2H), 2.43 (d, 2H), 2.35 (bs, 1H), 1.73 (bs, 2H), 1.65 (s, 12H), 0.97 (s, 3H) (Figures S–1 and S–2). IR (KBr pellet) ν(cm<sup>-1</sup>): 3343 (N-H), 2544 (S-H), 1658 (C=O) (Figure S–3). ESI-MS calcd for [C<sub>13</sub>H<sub>26</sub>N<sub>2</sub>O<sub>2</sub>S<sub>3</sub> + H]<sup>+</sup>: 339.6, found 339.3 (Figure S–4). Anal. calcd. for C<sub>13</sub>H<sub>26</sub>N<sub>2</sub>O<sub>2</sub>S<sub>3</sub>: C, 46.1; H, 7.7; N, 8.3, found: C, 47.6; H, 7.8; N, 8.1.

**Synthesis of (NMe<sub>4</sub>)<sub>2</sub>[Fe<sup>III</sup>(tame–N<sub>2</sub>S)S<sub>2</sub><sup>Me<sub>2</sub>)]•MeCN (15).</sup>** To a stirred solution of **14** (230 mg, 0.7 mmol) and NaOMe (160 mg, 3.0 mmol) in MeOH (7 mL) at -35 °C was added a pre-cooled (-35 °C) methanolic solution (5 mL) of FeCl<sub>3</sub> (100 mg, 0.6 mmol). The resulting red orange solution was stirred for 30 min and NMe<sub>4</sub>Cl (130 mg, 1.2 mmol) was added. The reaction mixture was allowed to stir overnight at ambient temperature. The solution was concentrated to dryness, dissolved in MeCN, filtered over a bed of celite and concentrated to a minimum amount of MeCN (~2 mL). X-ray quality dark orange crystals (205 mg, 0.4 mmol, 52%) were grown from slow diffusion of diethyl ether (20 ml) into MeCN (2 mL) at -35 °C.

**(NEt<sub>4</sub>)<sub>2</sub>[Fe<sup>III</sup>(tame–N<sub>2</sub>S)S<sub>2</sub><sup>Me<sub>2</sub>)]•3H<sub>2</sub>O (15a).</sup>** To a stirred solution of **14** (100 mg, 0.3 mmol) in DMF (1 mL) at -35 °C was added dropwise a pre-cooled (-35 °C) solution of (Et<sub>4</sub>N)(FeCl<sub>4</sub>) (97 mg, 0.3 mmol) in “wet” DMF (1 mL). A pre-cooled (-35 °C) solution of NaH (71 mg of a 60% dispersion in mineral oil, 1.8 mmol) in DMF (1 mL) was added followed by a pre-cooled (-35 °C) DMF (1 mL) solution of Et<sub>4</sub>NCl (49 mg, 0.3 mmol). The resulting reaction mixture was allowed to stir overnight at ambient temperature. Diethyl ether (50 mL) was added to the solution resulting in the immediate precipitation of a red orange solid. The solid was dissolved

in MeCN and filtered. The solution was concentrated to a minimum amount of MeCN (~2 mL), layered with 10 mL of Et<sub>2</sub>O, and cooled to -35 °C overnight to afford **15a** (130 mg, 0.2 mmol, 68%) as a red orange crystalline solid. IR (KBr pellet)  $\nu(\text{cm}^{-1})$ : 1559 (C=O). Electronic absorption (CH<sub>3</sub>CN):  $\lambda_{\text{max}}(\epsilon) = 330$  (8860), 433 (2570), 471 (3250) nm; (MeOH):  $\lambda_{\text{max}}(\epsilon) = 323$  (10400), 424 (2630), 479 (2560) nm; (H<sub>2</sub>O):  $\lambda_{\text{max}}(\epsilon) = 319$  (10380), 420 (3190), 473 (2930) nm. Solution magnetic moment (298 K; MeOH)  $\mu_{\text{eff}} = 3.99$  BM. EPR (MeOH/EtOH glass (9:1), 7 K):  $g_1 = 4.60$ ,  $g_2 = 3.40$ ,  $g_3 = 1.97$ . ESI-MS calcd for [FeC<sub>13</sub>H<sub>21</sub>N<sub>2</sub>O<sub>2</sub>S<sub>3</sub>]<sup>2-</sup>: 389.4, found 389.3. Anal. calcd. for FeC<sub>29</sub>H<sub>61</sub>N<sub>4</sub>O<sub>2</sub>S<sub>3</sub>: C, 53.6; H, 9.5; N, 8.6. Found: C, 53.6; H, 9.7; N, 8.5.

**Synthesis of [Fe<sup>II</sup>((tame-N<sub>3</sub>)S<sub>2</sub><sup>Me2</sup>)(CO)]•MeCN (16).** Two equivalents of 3-methyl-3-mercapto-2-butanone (1.17 g, 10 mmol) were combined with 1,1,1-Tris(aminomethyl)ethane (0.59 g, 5 mmol) and FeCl<sub>2</sub> (0.64 g, 5 mmol), in 30 mL MeOH. Carbon monoxide was then bubbled through the resulting reaction mixture for 30 min, the solution filtered, evaporated to dryness, and the solid redissolved in ~ 20 mL MeCN, and placed in a freezer overnight to afford 0.4 g (18% yield) of **16**•MeCN, as red plates. Electronic absorption (MeCN):  $\lambda_{\text{max}}(\epsilon) = 349$  (2730) nm. IR (KBr pellet)  $\nu(\text{cm}^{-1})$ : 1895 (CO), 1602 (C=N). Anal. calcd. for C<sub>18</sub>H<sub>32</sub>FeN<sub>4</sub>OS<sub>2</sub>: C, 49.00; H, 7.30; N, 12.70. Found: C, 48.67; H, 7.42; N, 12.69.

**Synthesis of [Fe<sup>III</sup>((tame-N<sub>3</sub>)S<sub>2</sub><sup>Me2</sup>)(NO)](PF<sub>6</sub>) (18).** On a high-vacuum line, 1.15 equivalents (in a calibrated 50 mL bulb) of NO (g) was added to a frozen degassed MeCN solution (10 mL) of **1** (2.57g, 5 mmol). The resulting solution was allowed to warm to ambient temperature and then layered with ether to afford 0.63 g (23 % yield) of **18**•MeCN, as orange plates. Electronic absorption (MeCN):  $\lambda_{\text{max}}(\epsilon) = 490$  (400) nm. IR (KBr pellet)  $\nu(\text{cm}^{-1})$ : 1866

(NO), 1622 (C=N). Anal. calcd. for  $C_{17}H_{32}FeN_5OS_2PF_6$ : C, 34.70; H, 5.49; N, 11.92. Found: C, 34.61; H, 5.55; N, 11.83.

**Synthesis of  $(Et_4N)_2[Fe^{III}(Tame-N_2S_2(SO_2))]$  (**20**).** To a stirred solution of **15a** (100 mg, 0.3 mmol) in DMF (1 mL) at  $-35\text{ }^\circ\text{C}$  was added dropwise a pre-cooled ( $-35\text{ }^\circ\text{C}$ ) solution of  $(Et_4N)(FeCl_4)$  (97 mg, 0.3 mmol) in DMF (1 mL). A pre-cooled ( $-35\text{ }^\circ\text{C}$ ) solution of NaH (71 mg of a 60% dispersion in mineral oil, 1.8 mmol) in DMF (1 mL) was added followed by a pre-cooled ( $-35\text{ }^\circ\text{C}$ ) DMF (1 mL) solution of  $Et_4NCl$  (49 mg, 0.3 mmol). The resulting reaction mixture was allowed to stir overnight at ambient temperature. Diethyl ether (50 mL) was added to the solution resulting in the immediate precipitation of a red orange solid. The solid was dissolved in MeCN and filtered. The solution was concentrated to a minimum amount of MeCN ( $\sim 2$  mL), layered with 10 mL of  $Et_2O$ , and cooled to  $-35\text{ }^\circ\text{C}$  overnight to afford **20** (130 mg, 0.2 mmol, 68%) as a red orange crystalline solid. IR (KBr pellet)  $\nu(\text{cm}^{-1})$ : 1559 (C=O), 1035 (S-O). Electronic absorption ( $CH_3CN$ ):  $\lambda_{\text{max}}$  ( $\epsilon$ ) = 330 (8860), 433 (2570), 471 (3250) nm; (MeOH):  $\lambda_{\text{max}}$  ( $\epsilon$ ) = 323 (10400), 424 (2630), 479 (2560) nm; ( $H_2O$ ):  $\lambda_{\text{max}}$  ( $\epsilon$ ) = 319 (10380), 420 (3190), 473 (2930) nm. EPR (MeOH/EtOH glass (9:1), 7 K):  $g_1 = 3.74$ ,  $g_2 = 2.02$ . ESI-MS calcd for  $[FeC_{13}H_{21}N_2O_2S_3]^{2-}$ : 389.4, found 389.3. Anal. calcd. for  $FeC_{29}H_{61}N_4O_2S_3$ : C, 53.6; H, 9.5; N, 8.6. Found: C, 53.6; H, 9.7; N, 8.5.

**X-ray Crystallographic Structure Determination.** Red crystal prisms of **1** (0.13 x 0.06 x 0.06 mm) and **2** (0.25 x 0.18 x 0.09 mm) were each mounted on a glass capillary with oil. Data for both was collected at  $-112\text{ }^\circ\text{C}$ . The crystal-to-detector distance was set to 27 mm for both **1** and **2**, and the exposure time was 60 seconds per degree for **1** and 20 seconds per degree for **2** for all sets, each with a scan width of  $1^\circ$ . The data collection



for **1** was 85.8% complete to 25° in  $\vartheta$ , and for **2** 93.5% complete to 20.80° in  $\vartheta$ . A total of 82543 partial and complete reflections were collected covering the indices,  $h = -16$  to 16,  $k = -18$  to 18,  $l = -16$  to 16 for **1**, and 46010 partial and complete reflections covering the indices,  $h = -15$  to 15,  $k = -11$  to 11,  $l = -22$  to 22 for **2**. For **1**, 48000 reflections were symmetry independent, and for **2**, 4412 reflections were symmetry independent. The  $R_{\text{int}} = 0.0250$  indicated that the data for **1** was brilliant, while the  $R_{\text{int}} = 0.0765$  for **2** indicated that the quality of data was fair (average quality 0.07). Indexing and unit cell refinement indicated an orthorhombic P lattice for **1**, and monoclinic P lattice for **2**. The space group for **1** was found to be  $Pnma$  (No.62), and that of **2** was found to be  $P2_1/c$  (No. 14) based on systematic absences

A brownish crystal prism of **3** (0.10 x 0.12 x 0.17 mm), and orange prism of **15** (0.48 x 0.12 x 0.12 mm) was mounted on a glass capillary with oil. Data for each was collected at -143°C. The crystal-to-detector distance was set to 30 mm and exposure time was 40 seconds per degree for **3** for all sets, and 30 seconds per degree for **15** for all sets with a scan width of 0.7° for **3** and 1.3° for **15**. The data collection for **3** was 93.7% complete to 24.79° in  $\vartheta$ , and 99.5% complete to 25° in  $\vartheta$  for **15**. A total of 91440 partial and complete reflections were collected covering the indices,  $h = -10$  to 10,  $k = -13$  to 13,  $l = -30$  to 30 for **3**, and 53920 partial and complete reflections, covering the indices,  $h = -24$  to 24,  $k = -20$  to 20,  $l = -28$  to 28 for **15**. 8596 reflections were symmetry independent for **3**, and 7568 reflections were symmetry independent for **15**. the  $R_{\text{int}} = 0.0603$  indicated that the data was good for **3**, and that of **15** ( $R_{\text{int}} = 0.0457$ ) indicated that the data was of better than average quality (average quality 0.07). Indexing and unit cell

refinement indicated a monoclinic P lattice for **3**, and an orthorhombic P lattice for **15**. The space group was found to be  $P 2_1/c$  (No. 14) for **3**, and  $Pbca$  (No.61) for **15**.

A black crystal prism 0.24 x 0.18 x 0.3 mm of **4** was mounted on a glass capillary in epoxy. Data was collected at 20 °C. The crystal-to-detector distance was set to 27 mm and exposure time was 60 seconds per degree for all sets with a scan width of 1.5°. The data collection was 94.4% complete to 26.35° in  $\vartheta$ . A total of 28235 partial and complete reflections were collected covering the indices,  $h = -27$  to 24,  $k = -14$  to 12,  $l = -18$  to 18. 3490 reflections were symmetry independent and the  $R_{int} = 0.1224$  indicated that the quality of data was acceptable, although the average value is smaller (0.07). Indexing and unit cell refinement indicated a monoclinic P lattice. The space group was found to be  $P 2_1/c$  (No. 14). Analysis of the normalized structure factors indicated a centric cell favoring above symmetry.

A red plate of **16** (0.24 × 0.23 × 0.09 mm), and orange plate of **18** (0.25 × 0.20 × 0.13 mm) was mounted on a glass capillary in epoxy. Data was collected at -112 °C. The crystal-to-detector distance was set to 27 mm and exposure time was 10 seconds per degree for **16**, and 15 seconds per degree for **18**, for all data sets, with a scan width of 1.0° for **16** and 2.4° for **18**. The data collection for **16** and **18** was 92.7%, and 95.2% complete, respectively, to 30.5° in  $\vartheta$  for each. A total of 33204 partial and complete reflections for **16**, and 46749 partial and complete reflections for **18**, were collected covering the indices,  $h = -13$  to 14,  $k = -14$  to 15,  $l = -17$  to 17 for **16**, and  $h = -16$  to 16,  $k = -21$  to 23,  $l = -19$  to 19 for **18**. 6233 reflections for **16**, and 7487 reflections for **18**, were symmetry independent. The  $R_{int} = 0.0588$  for **16**, and that for **18** ( $R_{int} = 0.0668$ ), indicated that the data was of better than average quality for both (average quality 0.07).

Indexing and unit cell refinement indicated a triclinic P lattice for **16**, and monoclinic P lattice for **18**. The space group for **16** was found to be  $P1\bar{1}$  (No.2), and that for **18** was found to be  $P2_1/c$  (No. 14).

A purple plate  $0.34 \times 0.30 \times 0.20$  mm of **19** was mounted on a glass capillary in epoxy. Data was collected at  $-112^\circ\text{C}$ . The crystal-to-detector distance was set to 27 mm and exposure time was 30 seconds per degree for all sets with a scan width of  $1.0^\circ$ . The data collection was 97.5% complete to  $30.5^\circ$  in  $\vartheta$ . A total of 52433 partial and complete reflections were collected covering the indices,  $h = -18$  to 18,  $k = -17$  to 17,  $l = -21$  to 21. 7859 reflections were symmetry independent and the  $R_{\text{int}} = 0.051$  indicated that the data was of better than average quality (average quality 0.07). Indexing and unit cell refinement indicated a orthorhombic P lattice. The space group was found to be  $P2_12_12_1$  (No. 19).

A red prism size  $0.31 \times 0.24 \times 0.12$  mm of **20** was mounted on a glass capillary with oil. Data was collected at  $-143^\circ\text{C}$ . The crystal-to-detector distance was set to 30 mm and exposure time was 50 seconds per degree for all sets with a scan width of  $1.4^\circ$ . The data collection was 98.5% complete to  $25^\circ$  in  $\vartheta$ . A total of 117076 partial and complete reflections were collected covering the indices,  $h = -14$  to 14,  $k = -22$  to 23,  $l = -27$  to 27. 8809 reflections were symmetry independent and the  $R_{\text{int}} = 0.0973$  indicated that the data was of slightly less than average quality (average quality 0.07). Indexing and unit cell refinement indicated a monoclinic P lattice. The space group was found to be  $P2_1/c$  (No. 14).

The data for **1–4**, **16**, **18–19**, and **20**, was integrated and scaled using Denzo-hkl-SCALEPACK, while that for **15**, was integrated and scaled using hkl-2000. With the

exception of **2**, and **18**, an absorption correction was performed using SORTAV for all structures. Solution by direct methods (SIR-2004 for **15**, SIR97 for **1**, and **20**, and SIR92 for **2–16**, and **18–19**) produced a complete heavy atom phasing model consistent with each of the proposed structures. All non-hydrogen atoms were refined anisotropically by full-matrix least-squares methods, while all hydrogen atoms were refined using a riding model. All hydrogen atoms for **19** were located by fourier synthesis except those on N(3), C(10), C(11), C(12), C(14), C(17) and C(18). All hydrogen atoms for **18** were located by fourier synthesis except those on C(16) which were placed with idealized methyl geometry. With structure **2**, the H-O-C-H torsion angle, involving the methanol solvate -OH hydrogens, was refined by adding two extra parameters, one for each methanol. The methanol solvate C(21)-O(4) of **3** was found to be disordered with a smaller than full occupancy (74(1)%). The other methanol solvate of **3** was found to be present in close to full site occupancy (98.2(8)%). The asymmetric unit of structure **4** was found to contain 1.5 cobalt anions and 1.5 tetraethyl ammonium cations; Co(2) and N(5) were each found on special positions. For structure **20**, S(3) and C(7) were disordered over two positions (77.8(5)% : 22.2(5)%) involving S(4) and C(32)). Crystal data for **1–4**, **15–16**, **18–19**, and **20**, is presented in Table 1. Selected bond distances and angles are assembled in Tables 2 and 4.

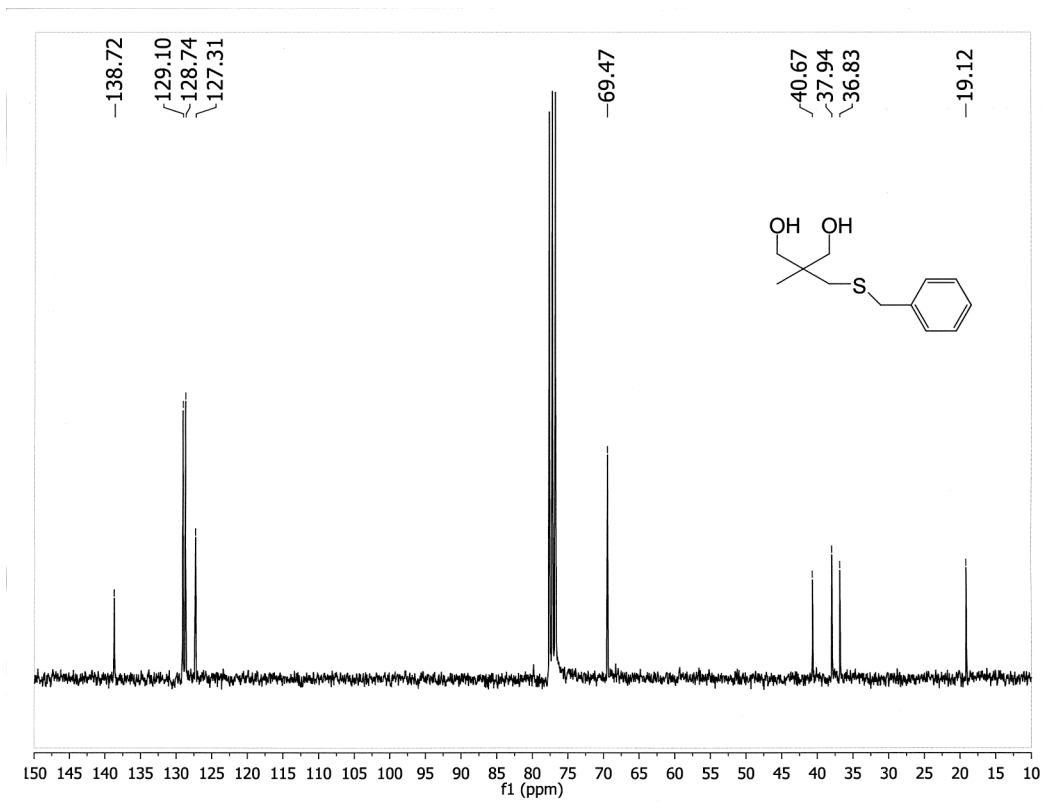

**Figure S-1.**  $^{13}\text{C}$  NMR( $\text{CDCl}_3$ ) of 2-benzylsulfanylmethyl-2-methyl-propane-1,3-diol (**7**).

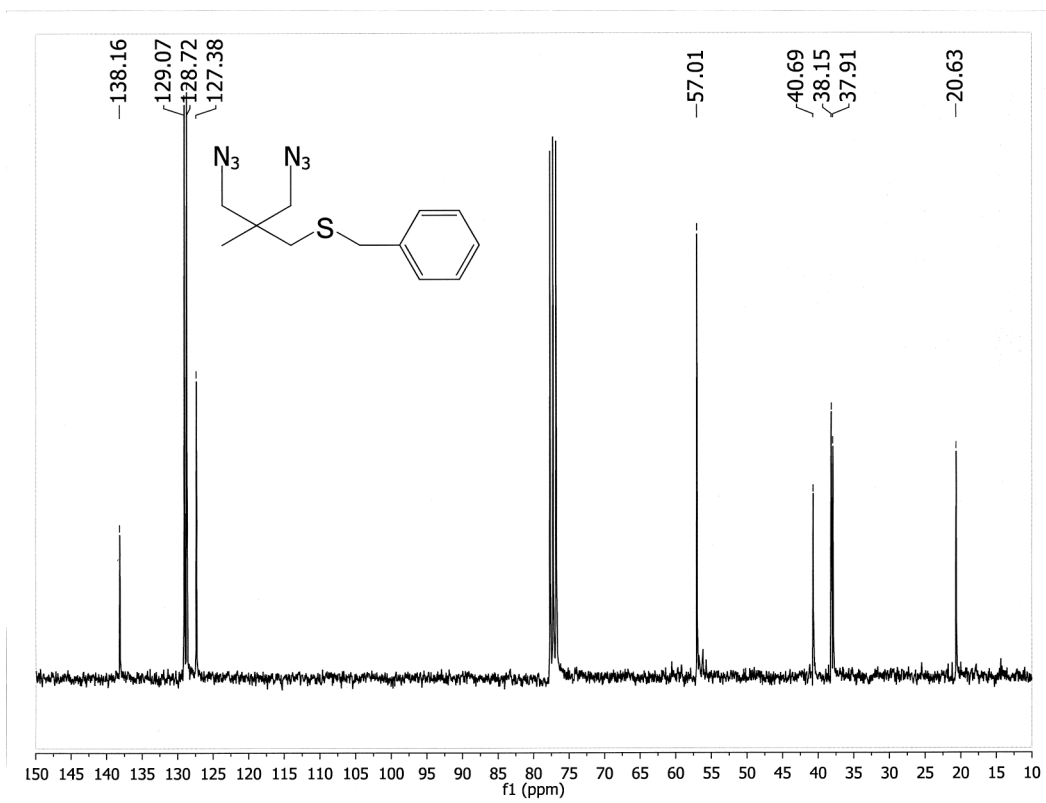

**Figure S-2.**  $^{13}\text{C}$  NMR( $\text{CDCl}_3$ ) of (3-azido-2-azidomethyl-2-methyl-propylsulfanyl)methyl-benzene (**8**).

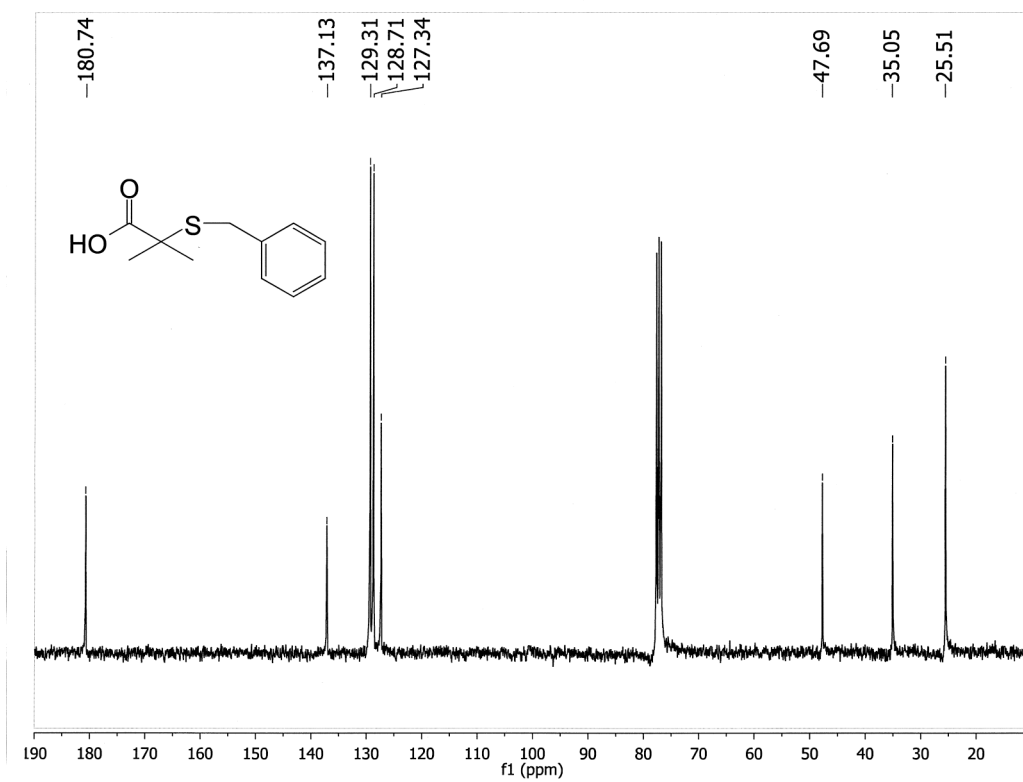

**Figure S-3.** <sup>13</sup>C NMR(CDCl<sub>3</sub>) of 2-benzylsulfanyl-2-methyl propionic acid (**11**).

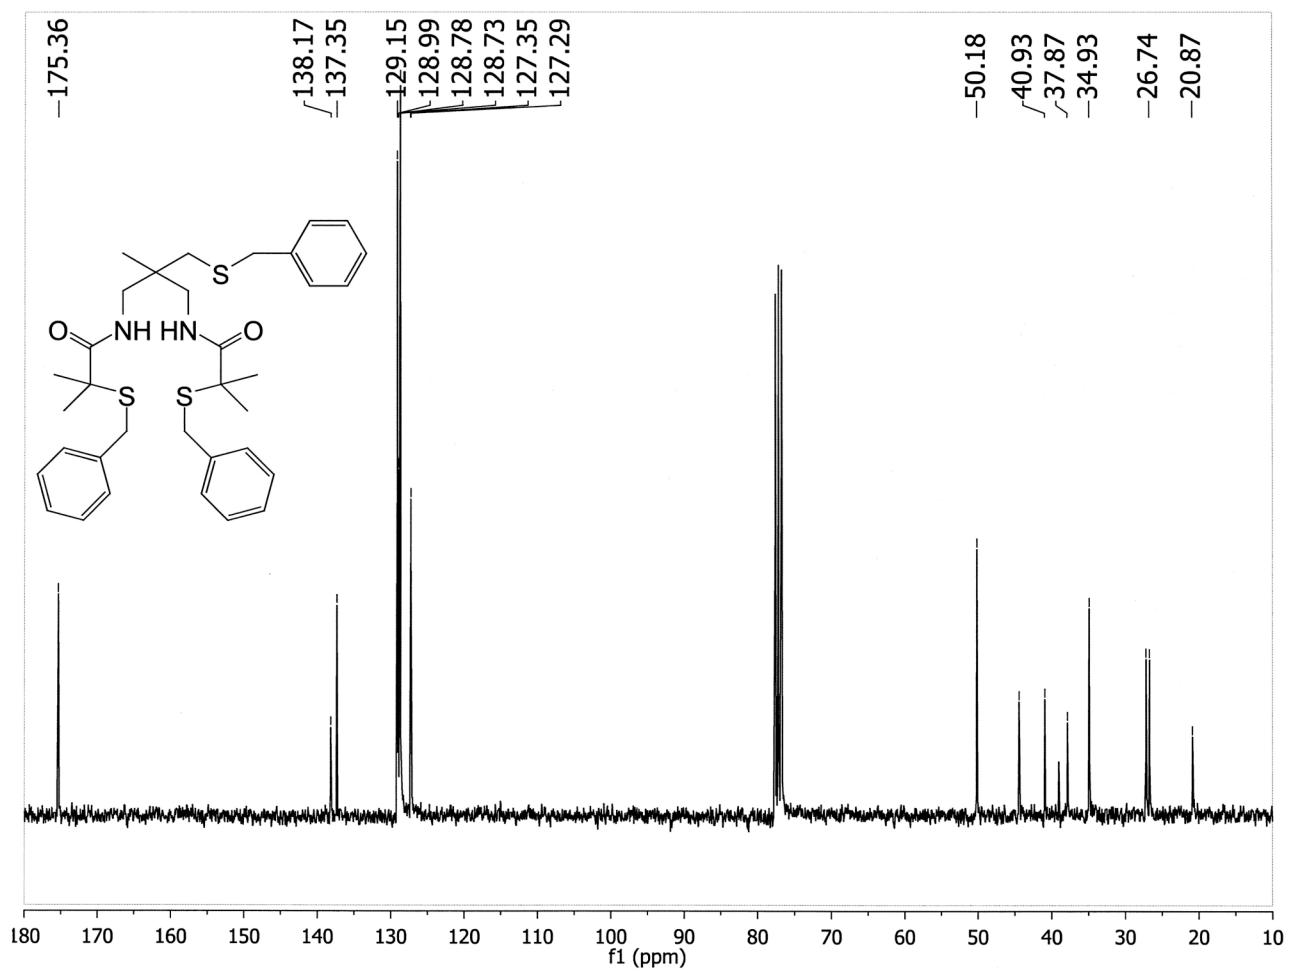

**Figure S-4a.**  $^{13}\text{C}$  NMR( $\text{CDCl}_3$ ) of benzyl-protected (Tame- $\text{N}_2\text{S}_3$ ) (**13**)



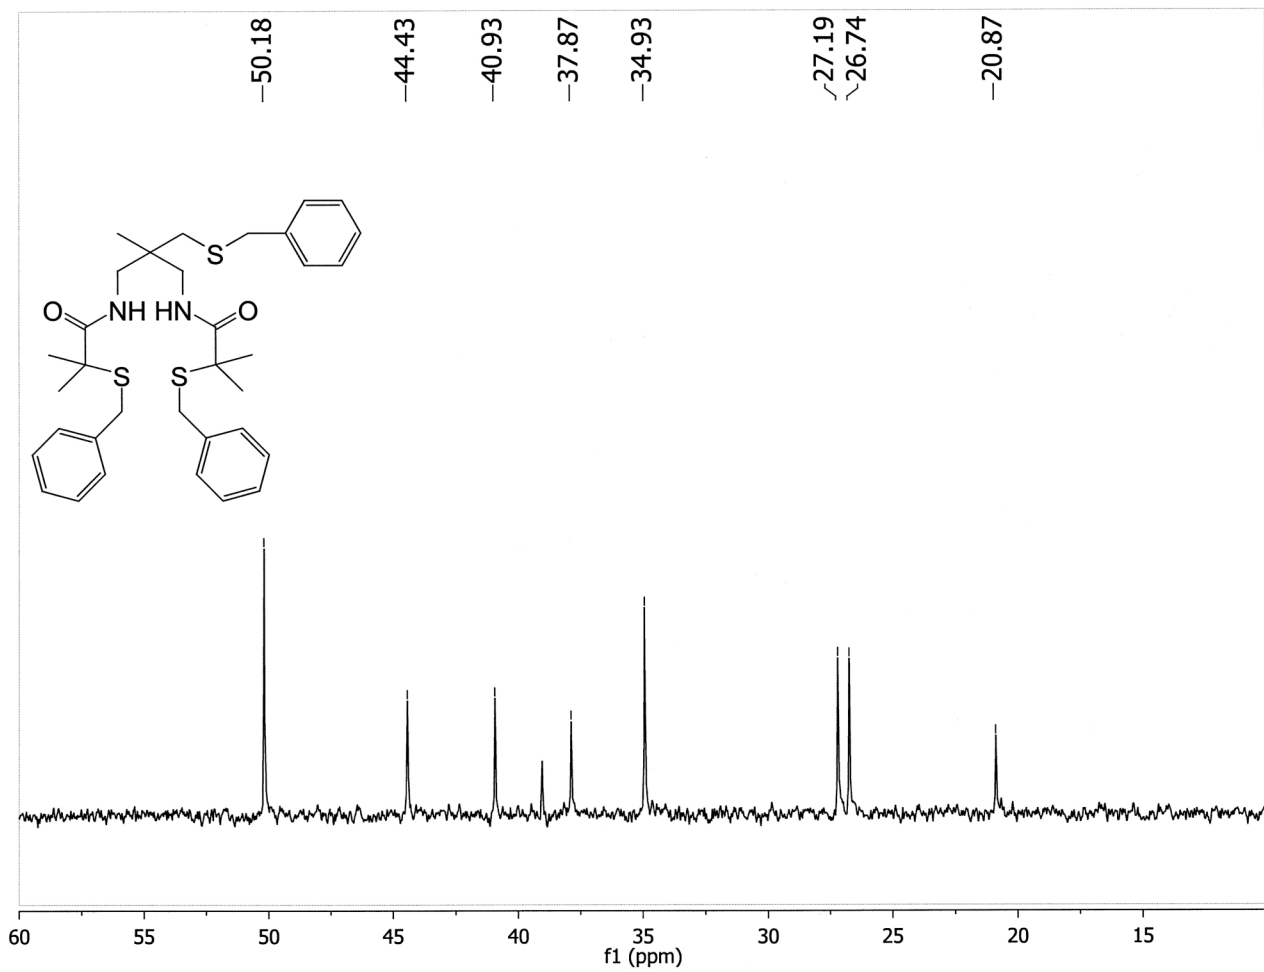

**Figure S-4b.** <sup>13</sup>C NMR(CDCl<sub>3</sub>) of benzyl-protected (Tame-N<sub>2</sub>S<sub>3</sub>) (**13**)

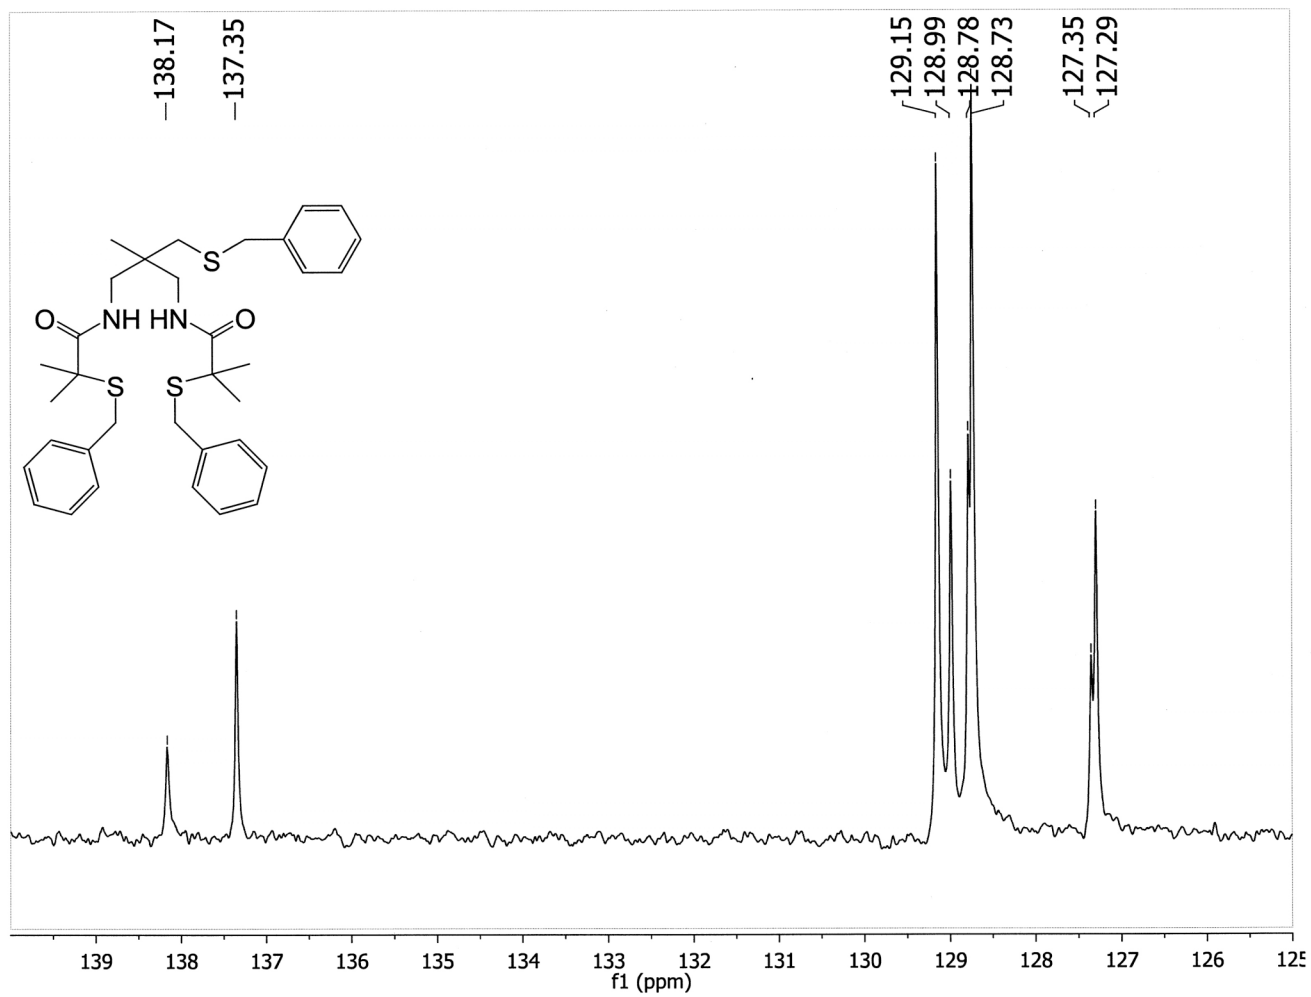

**Figure S-4c.** <sup>13</sup>C NMR(CDCl<sub>3</sub>) of benzyl-protected (Tame-N<sub>2</sub>S<sub>3</sub>) (**13**)

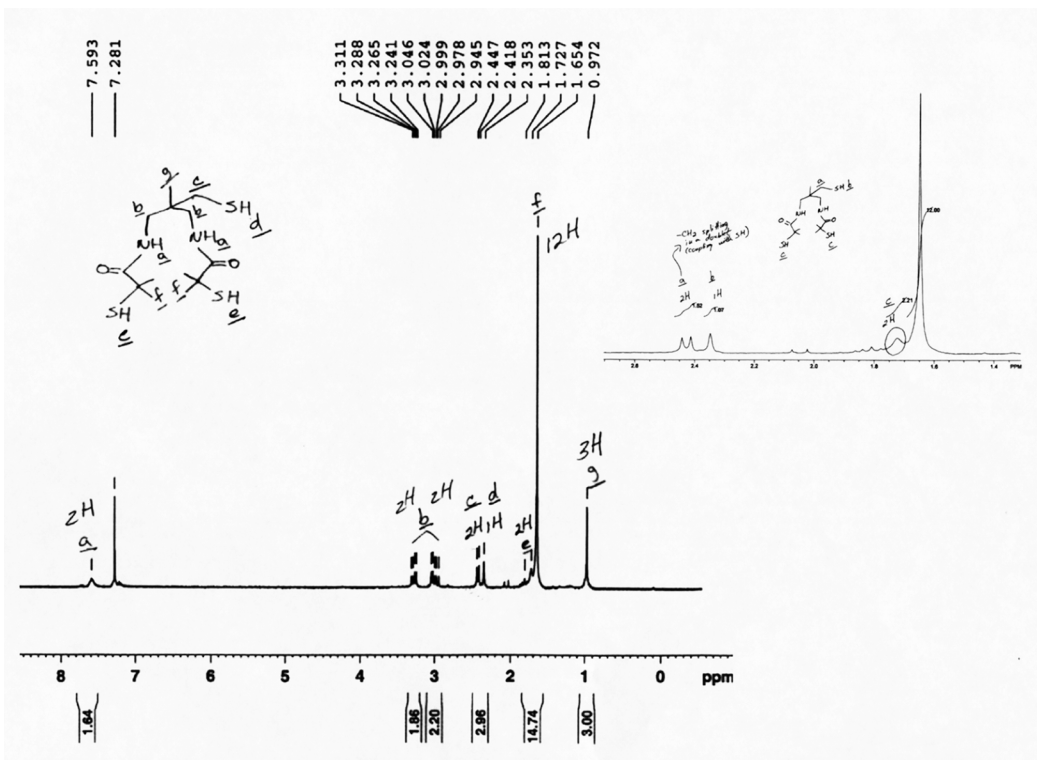

Figure S-5. <sup>1</sup>H NMR of tame-(NH)<sub>2</sub>(SH)<sub>3</sub> (14) ligand in CDCl<sub>3</sub>.

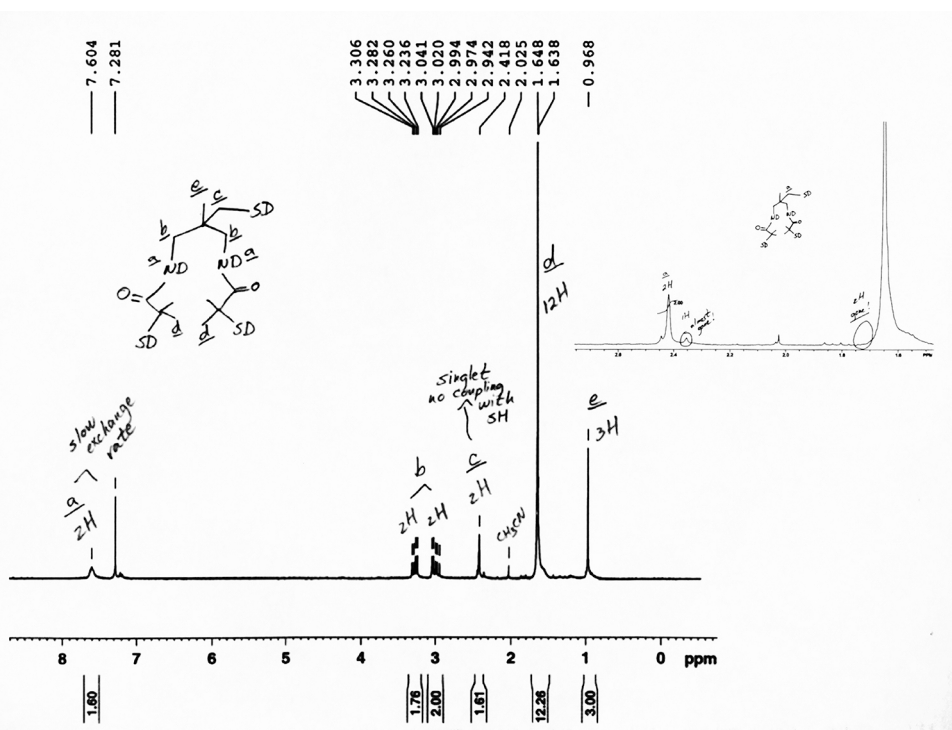

Figure S-6. <sup>1</sup>H NMR of deuterated tame-(ND)<sub>2</sub>(SD)<sub>3</sub> (14) ligand in CDCl<sub>3</sub>.

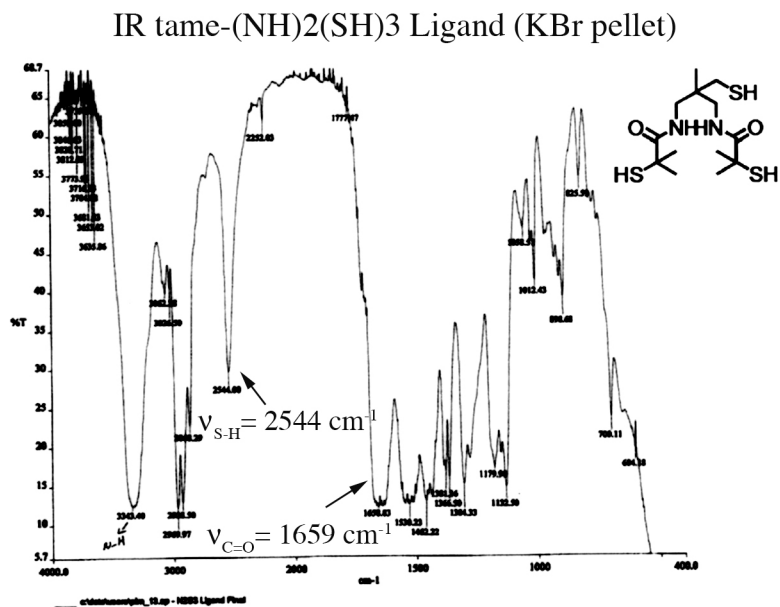

Figure S-7. IR spectrum of tame-(NH)<sub>2</sub>(SH)<sub>3</sub> (14) ligand, showing the  $\nu_{\text{SH}}$  and  $\nu_{\text{C=O}}$  stretches at 2544 cm<sup>-1</sup> and 1659 cm<sup>-1</sup>, respectively.

## ESI-MS N2S3 Ligand

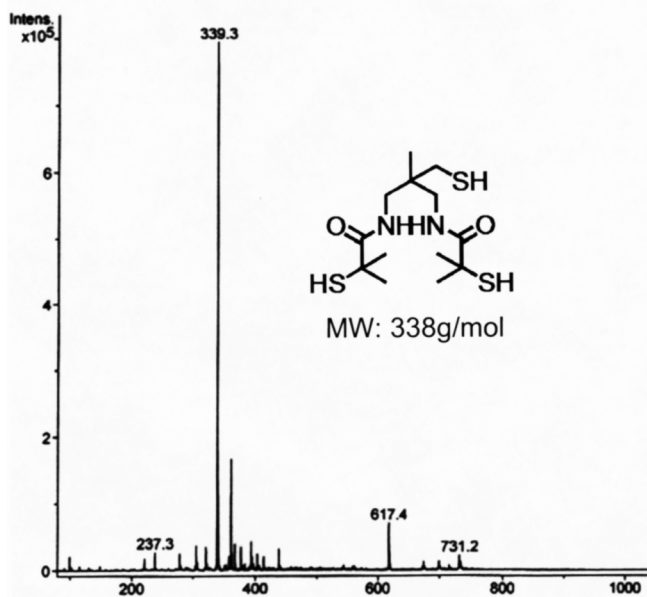

Figure S-8. ESI mass spec of tame-(NH)<sub>2</sub>(SH)<sub>3</sub> (**14**) ligand.

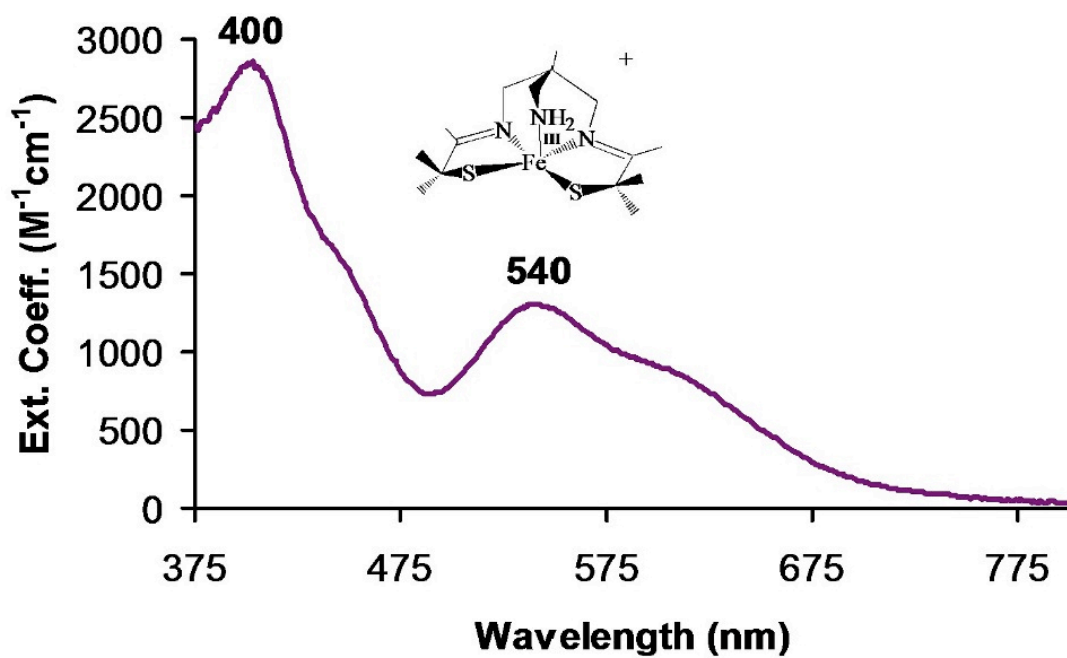

Figure S-9. Electronic absorption spectrum of  $[Fe^{III}((tame-N_3)S_2^{Me_2})](PF_6) \cdot BzCN$  (**1**) in MeCN at ambient temperature.

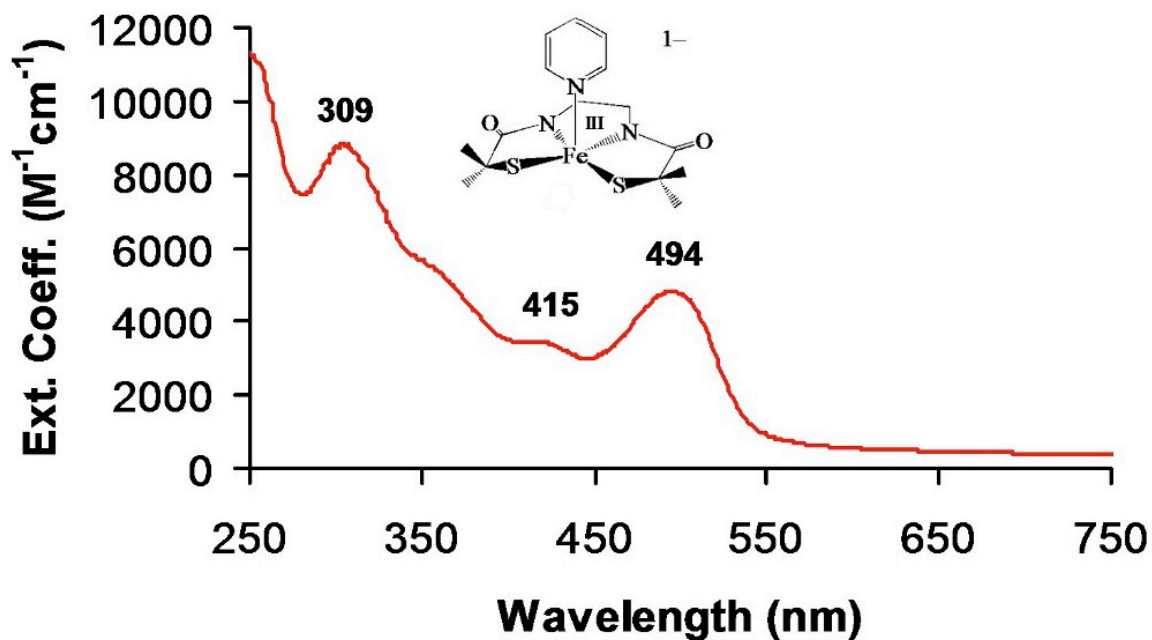

**Figure S-10.** Electronic absorption spectrum of pyridine-bound  $(\text{Me}_4\text{N})[\text{Fe}^{\text{III}}((\text{Et}-\text{N}_2)\text{S}_2^{\text{Me}_2})(\text{Py})]\cdot 2\text{MeOH}$  (**3**) in pyridine at ambient temperature.

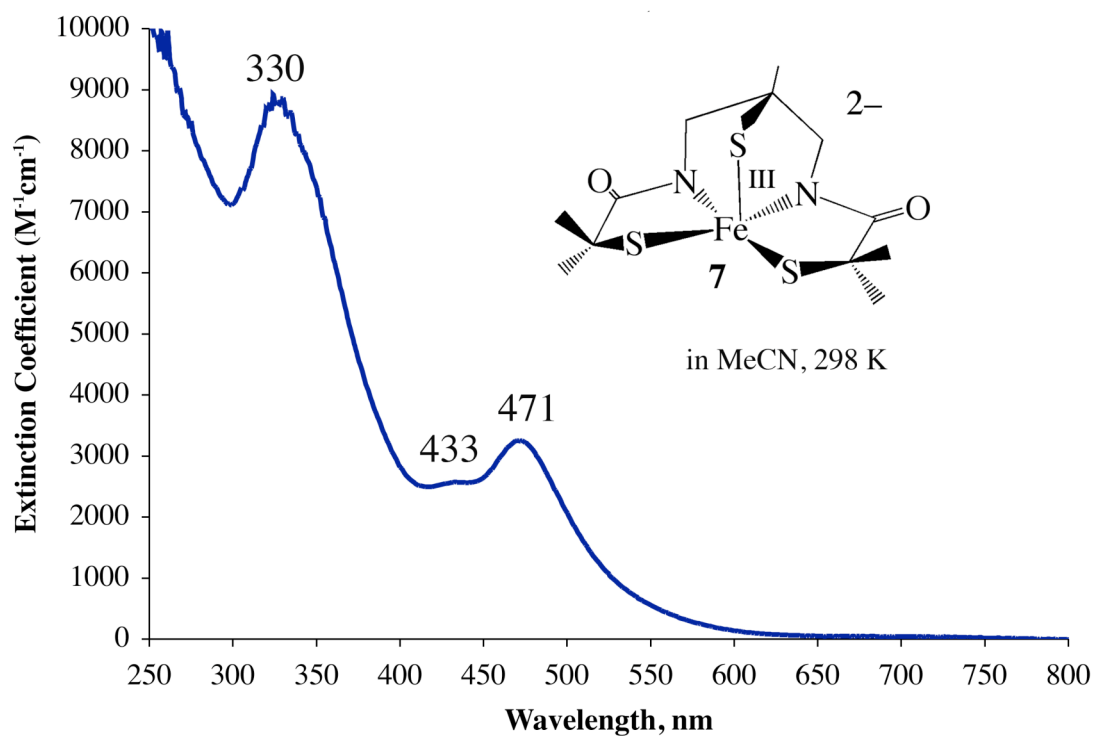

**Figure S-11.** Electronic absorption spectrum of red tris-thiolate ligated  $(\text{NMe}_4)_2[\text{Fe}^{\text{III}}((\text{tame-N}_2\text{S})\text{S}_2^{\text{Me}_2})_3]\cdot\text{MeCN}$  (**15**) in MeCN at ambient temperature.

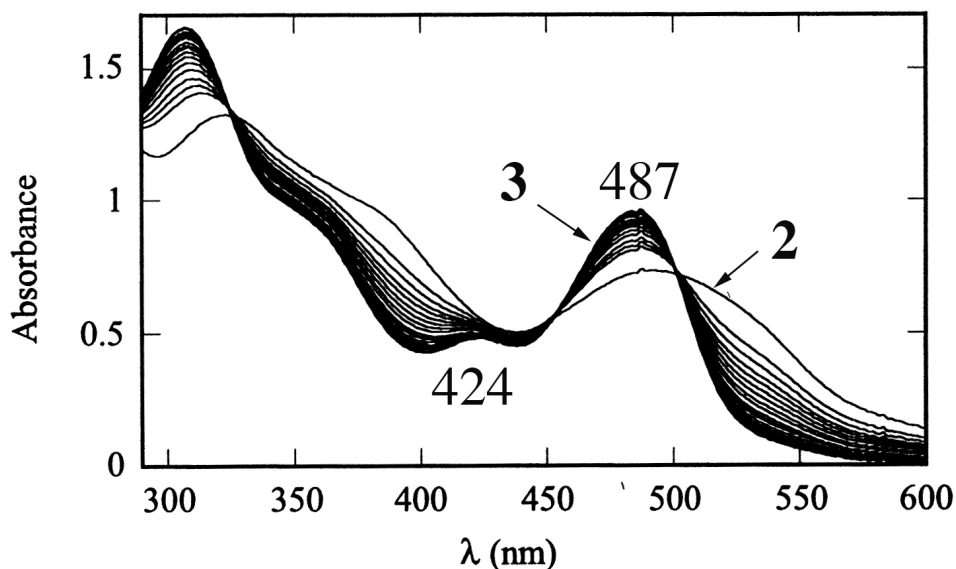

**Figure S-12.** Conversion of dimeric  $[\text{Fe}^{\text{III}}((\text{Et-N}_2)\text{S}_2^{\text{Me}_2})_2]^{2-}$  (**2**) to monomeric  $[\text{Fe}^{\text{III}}((\text{Et-N}_2)\text{S}_2^{\text{Me}_2})(\text{Py})]^{1-}$  (**3**) via the addition of 1-6 equiv pyridine in  $\text{CH}_2\text{Cl}_2$  at ambient temperature

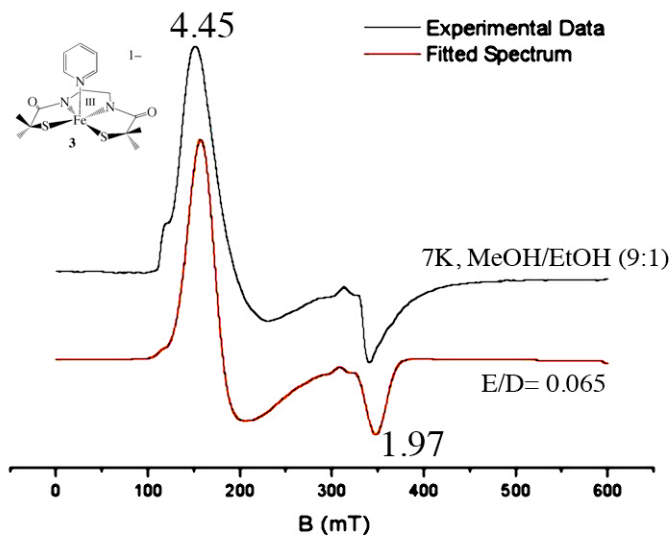

**Figure S-13.** Low temperature (7 K) X-band EPR spectrum (black) of  $(\text{Me}_4\text{N})[\text{Fe}^{\text{III}}((\text{Et}-\text{N}_2)\text{S}_2^{\text{Me}2})(\text{Py})]\cdot 2\text{MeOH}$  (**3**) in MeOH/EtOH (9:1) glass, fitted (red) to  $E/D = 0.065$ .

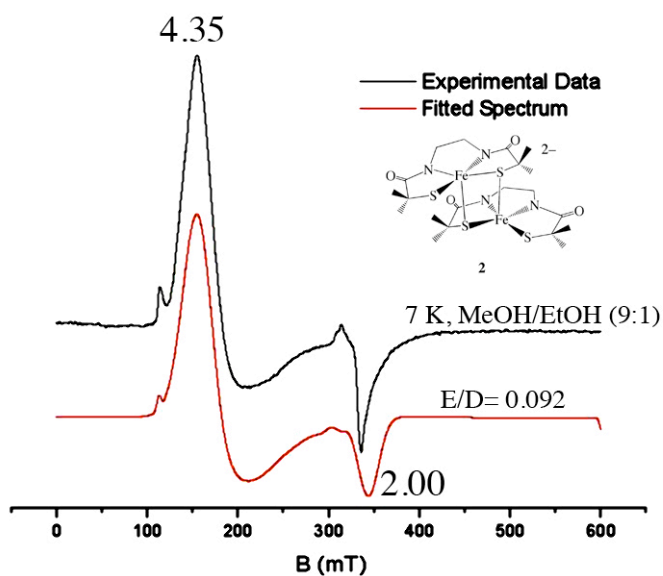

**Figure S-14.** Low temperature (7 K) X-band EPR spectrum (black) of dimeric  $(\text{NMe}_4)_2[\text{Fe}^{\text{III}}((\text{Et}-\text{N}_2)\text{S}_2^{\text{Me}2})]_2\cdot 2\text{MeOH}$  (**2**) in MeOH:EtOH (9:1) glass fitted (red) to  $E/D = 0.092$ .



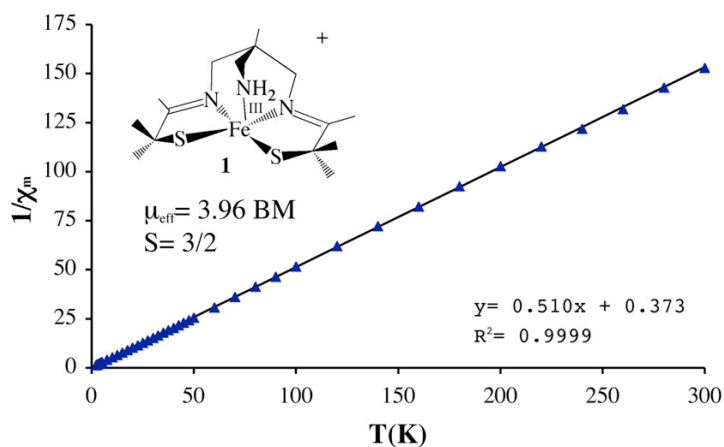

**Figure S-15.** Inverse molar magnetic susceptibility ( $1/\chi_m$ ) vs. temperature (T) plot for monomeric  $[\text{Fe}^{\text{III}}((\text{tame-N}_3)\text{S}_2^{\text{Me}_2})](\text{PF}_6)\cdot\text{BzCN}$  (**1**) fit to an  $S = 3/2$  spin-state.

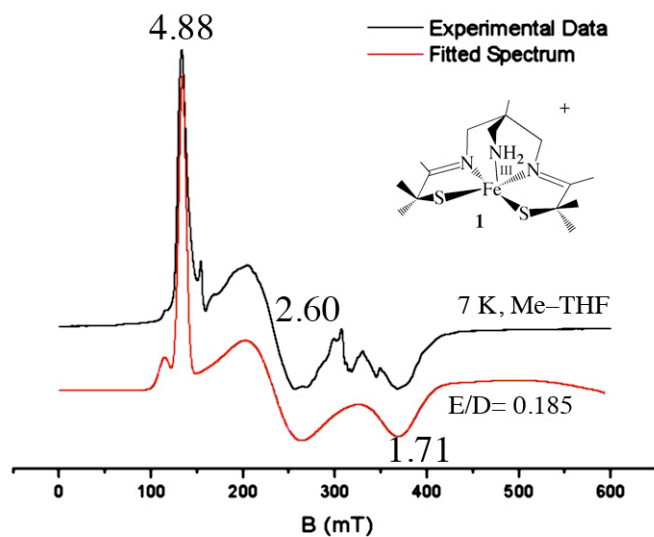

**Figure S-16.** Low temperature (7 K) X-band EPR spectrum (black) of  $[\text{Fe}^{\text{III}}((\text{tame-N}_3)\text{S}_2^{\text{Me}_2})](\text{PF}_6)\cdot\text{BzCN}$  (**1**) in Me-THF glass, fitted (red) to  $E/D = 0.185$ .

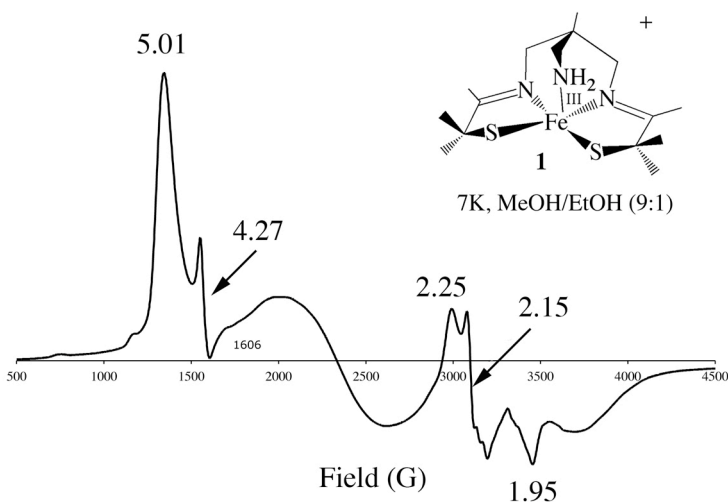

**Figure S-17.** Low temperature (7 K) X-band EPR spectrum of  $[\text{Fe}^{\text{III}}(\text{tame-N}_3\text{S}_2^{\text{Me}_2})](\text{PF}_6) \cdot \text{BzCN}$  (**1**) in MeOH/EtOH (9:1) coordinating solvent displaying a mixture of  $S=1/2$  and  $S=3/2$  spin-states.

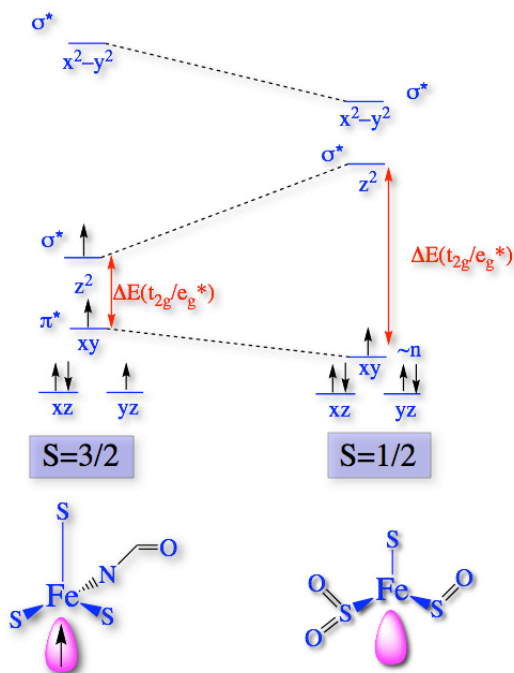

**Figure S-18.** d-orbital splitting diagram showing how the spin-state influences the Lewis acidity of the vacant apical site, and depends on the parameter  $\Delta E$ .  $\pi$ -bonding in the xy plane shrinks  $\Delta E$  favoring an  $S=3/2$  state. Oxygenation of the equatorial sulfurs would cause a spin-state change by diminishing the Fe-S  $\pi$ -interaction, increasing metal ion Lewis acidity, and consequently decreasing in the apical Fe-S bond length.

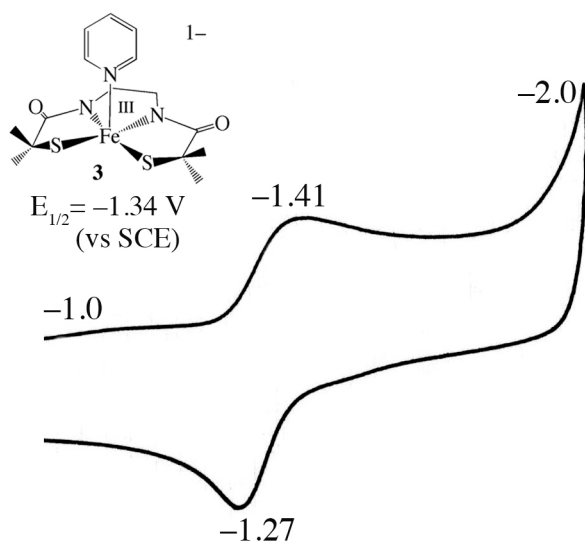

**Figure S-19.** Cyclic voltammogram of  $(\text{Me}_4\text{N})[\text{Fe}^{\text{III}}((\text{Et}-\text{N}_2)\text{S}_2^{\text{Me}2})(\text{Py})]\cdot 2\text{MeOH}$  (**3**) in pyridine at 298 K (0.1 M  $(\text{Bu}_4\text{N})\text{PF}_6$ , glassy carbon electrode, 150 mV/sec scan rate). Peak potentials versus SCE indicated.

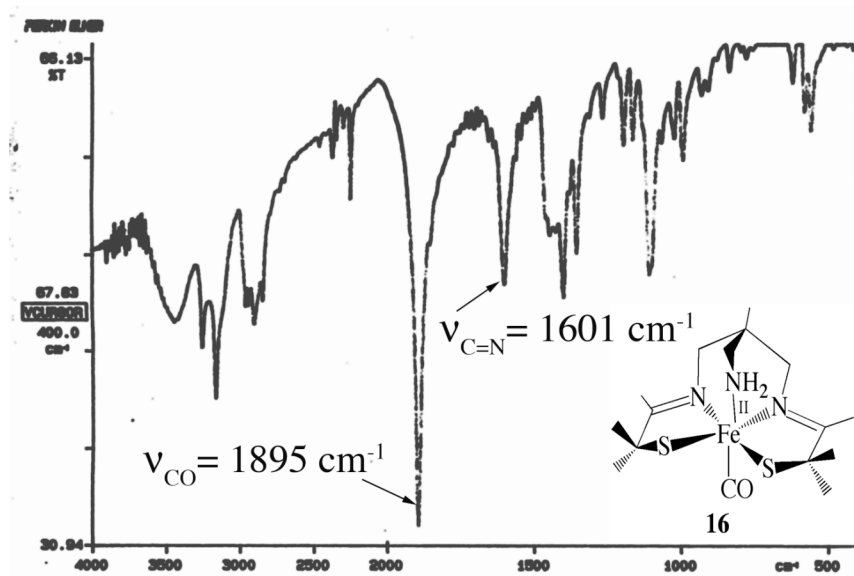

**Figure S-20.** Vibrational (IR) spectrum of  $[\text{Fe}^{\text{II}}((\text{tame}-\text{N}_3)\text{S}_2^{\text{Me}2})(\text{CO})]\cdot \text{MeCN}$  (**16**) (KBr pellet) showing the  $\nu_{\text{CO}}$  and  $\nu_{\text{C=N}}$  stretches.

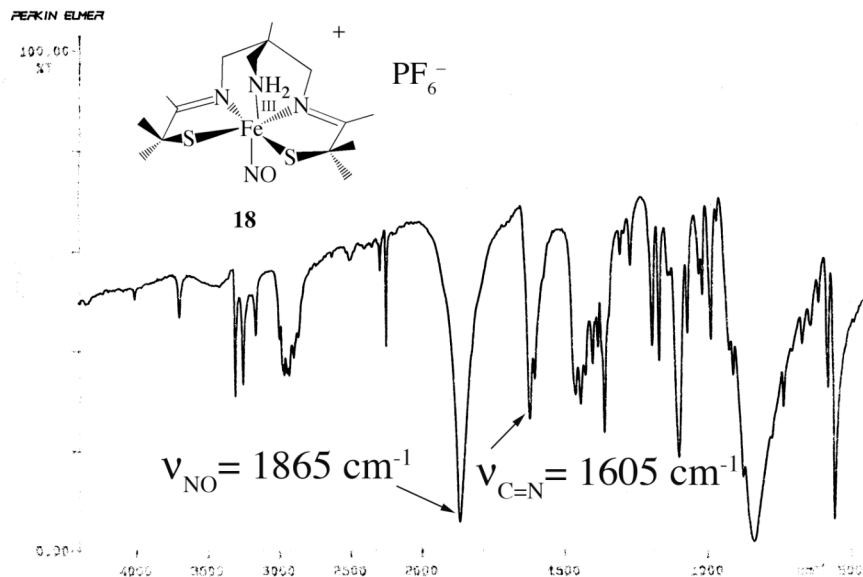

**Figure S-21.** Vibrational (IR) spectrum of [Fe<sup>III</sup>((tame-N<sub>3</sub>)S<sub>2</sub>Me<sub>2</sub>)(NO)](PF<sub>6</sub>)•MeCN (**18**) (KBr pellet) showing the  $\nu_{\text{NO}}$  and  $\nu_{\text{C=N}}$  stretches.

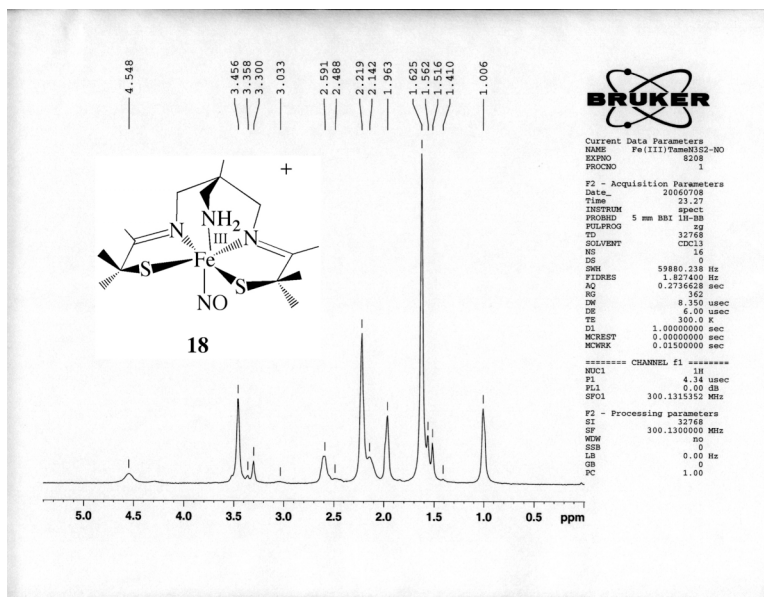

**Figure S-22.** Diamagnetic <sup>1</sup>H-NMR of [Fe<sup>III</sup>((tame-N<sub>3</sub>)S<sub>2</sub>Me<sub>2</sub>)(NO)](PF<sub>6</sub>)•MeCN (**18**).

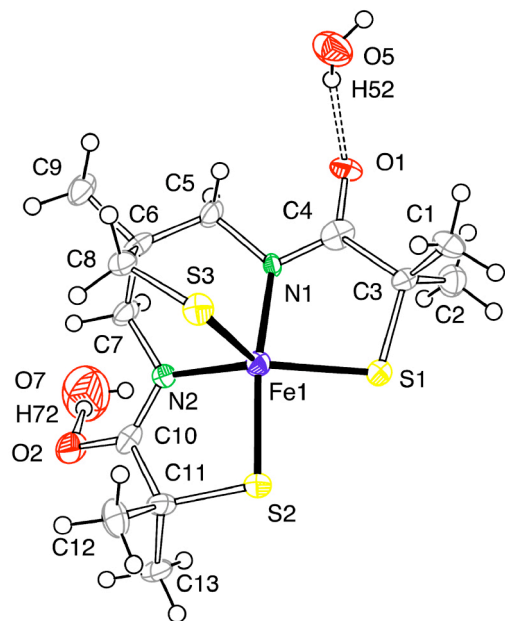

**Figure S-23.** ORTEP diagram of tris-thiolate ligated  $[\text{Fe}^{\text{III}}(\text{tame-N}_2\text{SS}_2^{\text{Me}_2})]^{2-} \cdot 3\text{H}_2\text{O}$  (**15**·**3H<sub>2</sub>O**) showing one of the two dianionic iron complexes contained in the unit cell, and three H-bonded co-crystallized  $\text{H}_2\text{O}$ 's with H-bonding metrical parameters of:  $\text{O}(1) \cdots \text{H}(52)(\text{H}_2\text{O}) = 2.010 \text{ \AA}$ ;  $\text{O}(1)-\text{H}(52)-\text{O}(5) = 163.3^\circ$ ;  $\text{O}(2) \cdots \text{H}(72)(\text{H}_2\text{O}) = 2.049 \text{ \AA}$ ;  $\text{O}(2)-\text{H}(72)-\text{O}(7) = 176.1^\circ$ ;  $\text{O}(3) \cdots \text{H}(61)(\text{H}_2\text{O}) = 1.998 \text{ \AA}$ ;  $\text{O}(3)-\text{H}(61)-\text{O}(6) = 169.0^\circ$ .

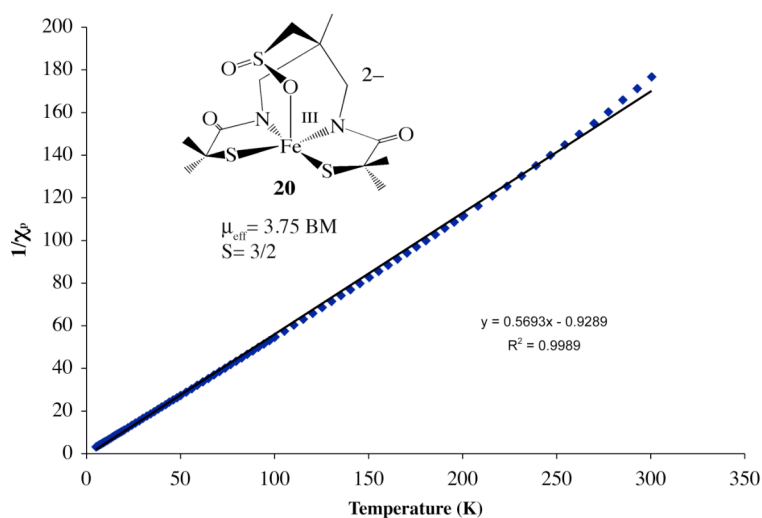

**Figure S-24.** Inverse molar magnetic susceptibility ( $1/\chi_{\text{m}}$ ) vs. temperature ( $T$ ) plot for  $(\text{Et}_4\text{N})_2[\text{Fe}^{\text{III}}(\text{tame-N}_2\text{SO}_2)_2\text{S}_2^{\text{Me}_2}]$  (**20**) fit to an  $S = 3/2$  spin-state.

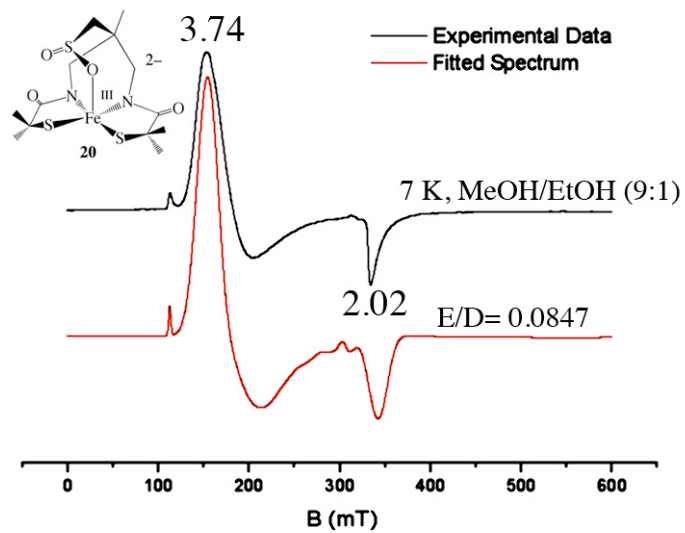

**Figure S-25.** Low temperature (7 K) X-band EPR spectrum (black) of  $(\text{Et}_4\text{N})_2[\text{Fe}^{\text{III}}(\text{tame-N}_2\text{SO}_2)_2\text{S}_2^{\text{Me}2}]$  (**20**) in 9:1 MeOH/EtOH glass, fitted (red) to  $E/D = 0.085$ .

**Table 1.** Crystal Data, Intensity Collection,<sup>a</sup> and Structure Refinement Parameters for [Fe<sup>III</sup>(tame-N<sub>3</sub>)S<sub>2</sub><sup>Me2</sup>](PF<sub>6</sub>)•BzCN (**1**), (NMe<sub>4</sub>)<sub>2</sub>[Fe<sup>III</sup>(Et-N<sub>2</sub>S<sub>2</sub><sup>Me2</sup>)<sub>2</sub>•2MeOH (**2**), (Me<sub>4</sub>N)[Fe<sup>III</sup>(N<sub>2</sub>-Et)S<sub>2</sub><sup>Me2</sup>](Py)]•2MeOH (**3**), (NMe<sub>4</sub>)<sub>2</sub>[Fe<sup>III</sup>(tame-N<sub>2</sub>S)S<sub>2</sub><sup>Me2</sup>)]•MeCN (**15**), [Fe<sup>II</sup>(tame-N<sub>3</sub>)S<sub>2</sub><sup>Me2</sup>](CO)]•MeCN (**16**), [Fe<sup>III</sup>(tame-N<sub>3</sub>)S<sub>2</sub><sup>Me2</sup>](NO)](PF<sub>6</sub>)•MeCN (**18**), and [Fe<sup>III</sup>((tame-N<sub>3</sub>)S<sub>2</sub><sup>Me2</sup>)(MeCN)](PF<sub>6</sub>)•MeCN(**19**), and (NEt<sub>4</sub>)<sub>2</sub>[Fe<sup>III</sup>(tame-N<sub>2</sub>SO<sub>2</sub>)S<sub>2</sub><sup>Me2</sup>)]•MeCN (**20**).

|                               | <b>1</b>                                                                      | <b>2</b>                                                                                        | <b>3</b>                                                                          | <b>15</b>                                                                         | <b>16</b>                                                           | <b>18</b>                                                                           | <b>19</b>                                                                          | <b>20</b>                                                                         |
|-------------------------------|-------------------------------------------------------------------------------|-------------------------------------------------------------------------------------------------|-----------------------------------------------------------------------------------|-----------------------------------------------------------------------------------|---------------------------------------------------------------------|-------------------------------------------------------------------------------------|------------------------------------------------------------------------------------|-----------------------------------------------------------------------------------|
| formula                       | C <sub>22</sub> H <sub>34</sub> F <sub>6</sub> N <sub>4</sub> PS <sub>2</sub> | Fe <sub>2</sub> C <sub>30</sub> H <sub>64</sub> N <sub>6</sub><br>O <sub>6</sub> S <sub>4</sub> | FeC <sub>21</sub> H <sub>40</sub> N <sub>4</sub><br>O <sub>4</sub> S <sub>2</sub> | FeC <sub>23</sub> H <sub>48</sub> N <sub>5</sub> O <sub>2</sub><br>S <sub>3</sub> | FeC <sub>18</sub> H <sub>32</sub> N <sub>4</sub><br>OS <sub>2</sub> | FeC <sub>17</sub> H <sub>32</sub> N <sub>5</sub> F <sub>6</sub><br>OPS <sub>2</sub> | FeC <sub>19</sub> H <sub>41</sub> F <sub>6</sub> N <sub>5</sub><br>PS <sub>2</sub> | FeC <sub>31</sub> H <sub>64</sub> N <sub>5</sub><br>O <sub>4</sub> S <sub>3</sub> |
| MW                            | 619.47                                                                        | 844.81                                                                                          | 524.76                                                                            | 578.69                                                                            | 440.45                                                              | 587.42                                                                              | 604.51                                                                             | 722.90                                                                            |
| T, K                          | 161(2)                                                                        | 161(2)                                                                                          | 130(2)                                                                            | 130(2)                                                                            | 161(2)                                                              | 161(2)                                                                              | 161(2)                                                                             | 130(2)                                                                            |
| unit cell                     | orthorhombic                                                                  | monoclinic                                                                                      | monoclinic                                                                        | orthorhombic                                                                      | triclinic                                                           | monoclinic                                                                          | orthorhombic                                                                       | monoclinic                                                                        |
| a, Å                          | 13.4465(3)                                                                    | 15.6210(5)                                                                                      | 9.0629(3)                                                                         | 18.6780(3)                                                                        | 9.8660(2)                                                           | 11.8332(4)                                                                          | 13.1206(3)                                                                         | 11.1840(4)                                                                        |
| b, Å                          | 14.8447(4)                                                                    | 11.8659(6)                                                                                      | 11.0976(3)                                                                        | 15.0370(3)                                                                        | 10.6971(2)                                                          | 16.5201(6)                                                                          | 13.6458(2)                                                                         | 17.9000(6)                                                                        |
| c, Å                          | 13.7368(4)                                                                    | 22.8715(10)                                                                                     | 26.0129(9)                                                                        | 21.9230(5)                                                                        | 12.0377(3)                                                          | 13.3947(3)                                                                          | 14.9657(4)                                                                         | 20.8980(7)                                                                        |
| α, deg                        | 90                                                                            | 90                                                                                              | 90                                                                                | 90                                                                                | 69.978(1)                                                           | 90                                                                                  | 90                                                                                 | 90                                                                                |
| β, deg                        | 90                                                                            | 92.556(2)                                                                                       | 93.499(2)                                                                         | 90                                                                                | 75.412(1)                                                           | 106.785(2)                                                                          | 90                                                                                 | 112.903(1)                                                                        |
| γ, deg                        | 90                                                                            | 90                                                                                              | 90                                                                                | 90                                                                                | 68.508(1)                                                           | 90                                                                                  | 90                                                                                 | 90                                                                                |
| V, Å <sup>3</sup>             | 2741.99(12)                                                                   | 4235.2(3)                                                                                       | 2611.4(1)                                                                         | 6157.3(2)                                                                         | 1098.97(4)                                                          | 2506.91(1)                                                                          | 2679.5(1)                                                                          | 3853.8(2)                                                                         |
| Z                             | 4                                                                             | 4                                                                                               | 4                                                                                 | 8                                                                                 | 2                                                                   | 4                                                                                   | 4                                                                                  | 4                                                                                 |
| d(calc),<br>g/cm <sup>3</sup> | 1.501                                                                         | 1.325                                                                                           | 1.335                                                                             | 1.249                                                                             | 1.331                                                               | 1.556                                                                               | 1.499                                                                              | 1.246                                                                             |
| space<br>group                | <i>Pnma</i>                                                                   | <i>P2<sub>1</sub>/c</i>                                                                         | <i>P2<sub>1</sub>/c</i>                                                           | <i>Pbca</i>                                                                       | <i>P1</i> (bar)                                                     | <i>P2<sub>1</sub>/c</i>                                                             | <i>P2<sub>1</sub>2<sub>1</sub>2<sub>1</sub></i>                                    | <i>P2<sub>1</sub>/c</i>                                                           |
| R                             | 0.0732 <sup>b</sup>                                                           | 0.0923 <sup>b</sup>                                                                             | 0.0446 <sup>b</sup>                                                               | 0.0426 <sup>b</sup>                                                               | 0.0446 <sup>b</sup>                                                 | 0.0503 <sup>b</sup>                                                                 | 0.0534 <sup>b</sup>                                                                | 0.0647 <sup>b</sup>                                                               |
| R <sub>w</sub>                | 0.2017 <sup>c</sup>                                                           | 0.2514 <sup>c</sup>                                                                             | 0.1047 <sup>c</sup>                                                               | 0.1095 <sup>c</sup>                                                               | 0.1256 <sup>c</sup>                                                 | 0.1508 <sup>c</sup>                                                                 | 0.1691 <sup>c</sup>                                                                | 0.2015 <sup>c</sup>                                                               |
| GOF                           | 0.965                                                                         | 1.021                                                                                           | 0.935                                                                             | 0.940                                                                             | 1.09                                                                | 1.06                                                                                | 1.036                                                                              | 0.960                                                                             |

<sup>a</sup> Mo K $\alpha$ ( $\lambda = 0.71073$  Å) radiation; graphite monochromator; -90 °C. <sup>b</sup>  $R = \sum ||F_o| - |F_c|| / \sum |F_o|$ . <sup>c</sup>  $R_w = \{\sum [w(F_o^2 - F_c^2)^2] / \sum [w(F_o^2)^2]\}^{1/2}$ ;  $w = 1/[\sigma^2(F_o^2) + (0.1155P)^2 + 10.6657P]$ , where  $P = [F_o^2 + 2F_c^2]/3$  and  $x = 0.1155$  (**1**), 0.1138 (**2**), 0.0481 (**3**), 0.0591 (**15**), 0.0703 (**16**), 0.0792 (**18**), 0.1061 (**19**), 0.0906 (**20**); and  $y = 10.6657$  (**1**), 0.000 (**2, 3, 15, 16, 19, 20**), 0.310 (**18**).

**Table S-2.** Selected bond distances (Å) and bond angles (deg) for Five-Coordinate [Fe<sup>III</sup>(tame-N<sub>3</sub>S<sub>2</sub><sup>Me2</sup>)](PF<sub>6</sub>)•BzCN (**1**), (NMe<sub>4</sub>)<sub>2</sub>[Fe<sup>III</sup>(Et-N<sub>2</sub>S<sub>2</sub><sup>Me2</sup>)<sub>2</sub>]•2MeOH (**2**), (Me<sub>4</sub>N)[Fe<sup>III</sup>(Et-N<sub>2</sub>S<sub>2</sub><sup>Me2</sup>)(Py)]•2MeOH (**3**), (NMe<sub>4</sub>)<sub>2</sub>[Fe<sup>III</sup>((tame-N<sub>2</sub>S)<sub>2</sub><sup>Me2</sup>)]•MeCN (**15**) and (NEt<sub>4</sub>)<sub>2</sub>[Fe<sup>III</sup>((tame-N<sub>2</sub>SO<sub>2</sub>)<sub>2</sub><sup>Me2</sup>)]•MeCN (**20**).

|              | <b>1</b>   | <b>2</b>   | <b>3</b>  | <b>15</b>  | <b>20</b> |
|--------------|------------|------------|-----------|------------|-----------|
| Fe-S(1)      | 2.189(1)   | 2.251(2)   | 2.216(1)  | 2.2171(7)  | 2.225(1)  |
| Fe-S(2)      | 2.189(1)   | 2.199(2)   | 2.204(1)  | 2.2219(6)  | 2.222(1)  |
| Fe-S(3)      | N/A        | 2.4464(18) | N/A       | 2.4058(7)  | N/A       |
| Fe-N(1)      | 1.999(4)   | 1.915(5)   | 1.920(3)  | 1.9572(18) | 1.941(4)  |
| Fe-N(2)      | 1.999(4)   | 1.900(4)   | 1.898(3)  | 1.9573(18) | 1.942(4)  |
| Fe-N(3)      | 2.132(6)   | N/A        | 2.167(3)  | N/A        | N/A       |
| Fe-O(3)      | N/A        | N/A        | N/A       | N/A        | 2.025(3)  |
| N(1)-C(#)    | 1.291(6)   | 1.325(8)   | 1.332(4)  | 1.337(3)   | 1.352(7)  |
| C(#)-O(1)    | N/A        | 1.261(7)   | 1.251(4)  | 1.259(3)   | 1.249(6)  |
| N(2)-C(#)    | 1.291(6)   | 1.318(8)   | 1.342(4)  | 1.337(3)   | 1.340(6)  |
| C(#)-O(2)    | N/A        | 1.245(7)   | 1.250(4)  | 1.252(3)   | 1.255(5)  |
| S(3)-O(3)    | N/A        | N/A        | N/A       | N/A        | 1.511(3)  |
| S(3)-O(4)    | N/A        | N/A        | N/A       | N/A        | 1.498(4)  |
| S(1)-Fe-S(2) | 89.55(8)   | 94.93(6)   | 94.83(4)  | 86.91(2)   | 87.23(5)  |
| S(2)-Fe-N(1) | 163.42(13) | 153.82(18) | 153.77(9) | 161.81(6)  | 154.6(1)  |
| S(1)-Fe-N(2) | 163.42(13) | 154.47(18) | 159.22(9) | 151.92(6)  | 164.3(1)  |
| N(1)-Fe-N(2) | 97.0(2)    | 83.5(2)    | 82.91(12) | 95.12(7)   | 93.7(2)   |
| S(1)-Fe-S(3) | N/A        | 99.14(6)   | N/A       | 117.19(2)  | N/A       |
| S(2)-Fe-S(3) | N/A        | 92.85(6)   | N/A       | 109.72(3)  | N/A       |
| S(1)-Fe-N(3) | 110.96(12) | N/A        | 100.86(8) | N/A        | N/A       |
| S(2)-Fe-N(3) | 110.96(12) | N/A        | 102.87(8) | N/A        | N/A       |
| S(1)-Fe-O(3) | N/A        | N/A        | N/A       | N/A        | 101.8(1)  |
| S(2)-Fe-O(3) | N/A        | N/A        | N/A       | N/A        | 107.9(1)  |
| τ-value      | 0.0        | 0.011      | 0.090     | 0.165      | 0.162     |



**Table S-3.** Selected Bond Distances (Å) and Angles (deg) for oxidized  $[\text{Fe}^{\text{III}}(\text{tame-N}_3\text{S}_2^{\text{Me}_2})]^+$  (**1**),  $[\text{Fe}^{\text{III}}(\text{tame-N}_3\text{S}_2^{\text{Me}_2})(\text{NO})]^+$  (**18**), and  $[\text{Fe}^{\text{III}}(\text{N}_3(\text{tame})\text{S}_2^{\text{Me}_2})(\text{MeCN})]^+$  (**19**). And reduced  $[\text{Fe}^{\text{II}}(\text{tame-N}_3\text{S}_2^{\text{Me}_2})(\text{CO})]$  (**16**).

|              | <b>1</b>   | <b>16</b>                   | <b>18</b>               | <b>19</b>             |
|--------------|------------|-----------------------------|-------------------------|-----------------------|
| Fe-S(1)      | 2.1887(14) | 2.2790(4)                   | 2.2582(6)               | 2.1884(12)            |
| Fe-S(2)      | 2.1886(14) | 2.2782(4)                   | 2.2504(6)               | 2.1852(12)            |
| Fe-N(1)      | 1.999(4)   | 1.9876(12)                  | 1.9996(18)              | 2.012(3)              |
| Fe-N(2)      | 1.999(4)   | 1.9947(13)                  | 2.0035(17)              | 2.002(4)              |
| Fe-N(3)      | 2.132(6)   | 2.0663(13)                  | 2.0324(17)              | 2.188(3)              |
| Fe-X         | N/A        | 1.7281(17) <sup>&amp;</sup> | 1.6359(18) <sup>@</sup> | 2.63 <sup>#</sup>     |
| X-Y          | N/A        | 1.155(2) <sup>&amp;</sup>   | 1.144(2) <sup>@</sup>   | 1.159(7) <sup>#</sup> |
| N(1)-C(#)    | 1.291(6)   | 1.2831(19)                  | 1.288(3)                | 1.276(5)              |
| N(2)-C(#)    | 1.291(6)   | 1.2862(19)                  | 1.286(3)                | 1.287(5)              |
| S(1)-Fe-S(2) | 89.55(8)   | 92.612(16)                  | 89.27(2)                | 91.38(4)              |
| N(1)-Fe-N(2) | 97.0(2)    | 100.43(5)                   | 101.64(7)               | 97.91(12)             |
| N(3)-Fe-X    | N/A        | 174.60(6) <sup>&amp;</sup>  | 174.29(8) <sup>@</sup>  | 153.4                 |
| S(1)-Fe-N(3) | 110.96(12) | 92.91(4)                    | 89.45(5)                | 105.22(10)            |
| S(2)-Fe-N(3) | 110.96(12) | 93.07(3)                    | 91.08(5)                | 105.99(10)            |

<sup>&</sup>X= C(16); Y= O(1); C(16)-O(1); <sup>@</sup> X= N(4); Y= O(1); N(4)-O(1); <sup>#</sup> X= N(4); Y= C(16); N(4)-C((16)-C(17))

**Table S-4.** Crystal data and structure refinement for  
 $[\text{Fe}(\text{III})(\text{tame-N}_3)\text{S}_2^{\text{Me}_2}](\text{PF}_6) \cdot \text{BzCN} (\mathbf{1})$ .

|                                                                                              |                                                                                                                                   |
|----------------------------------------------------------------------------------------------|-----------------------------------------------------------------------------------------------------------------------------------|
| Empirical formula                                                                            | C22 H34 F6 Fe N4 P S2                                                                                                             |
| Formula weight                                                                               | 619.47                                                                                                                            |
| Temperature                                                                                  | 161(2) K                                                                                                                          |
| Wavelength                                                                                   | 0.71073 Å                                                                                                                         |
| Crystal description/color                                                                    | prism / red                                                                                                                       |
| Crystal system, space group                                                                  | Orthorhombic, Pnma                                                                                                                |
| Unit cell dimensions                                                                         | a = 13.4460(3)Å alpha = 90 deg.<br>b = 14.8450(4)Å beta = 90 deg.<br>c = 13.7370(4)Å gamma = 90 deg.                              |
| Volume                                                                                       | 2741.99(12) Å <sup>3</sup>                                                                                                        |
| Z, Calculated density                                                                        | 4, 1.501 Mg/m <sup>3</sup>                                                                                                        |
| Absorption coefficient                                                                       | 0.821 mm <sup>-1</sup>                                                                                                            |
| F(000)                                                                                       | 1284                                                                                                                              |
| Crystal size                                                                                 | 0.13 x 0.06 x 0.06 mm                                                                                                             |
| Reflections for indexing                                                                     | 259                                                                                                                               |
| Theta range for data collection                                                              | 2.97 to 25.68 deg.                                                                                                                |
| Index ranges                                                                                 | -16<=h<=16, 18<=k<=18,<br>-16<=l<=16                                                                                              |
| Reflections collected/unique                                                                 | 4800 / 2604 [R(int) = 0.0250]                                                                                                     |
| Completeness to theta                                                                        | 25.00 95.8%                                                                                                                       |
| Absorption correction                                                                        | Semi-empirical from equivalents                                                                                                   |
| Max. and min. transmission                                                                   | 0.953 and 0.901                                                                                                                   |
| Refinement method                                                                            | Full-matrix least-squares on F <sup>2</sup>                                                                                       |
| Data / restraints / parameters                                                               | 2604 / 7 / 187                                                                                                                    |
| Goodness-of-fit on F <sup>2</sup>                                                            | S = 0.965                                                                                                                         |
| S = root(sum(w*D*D)/(n-p)), where D = (Fo*Fo - Fc*Fc)                                        |                                                                                                                                   |
| Final R indices [I>2sigma(I)]                                                                | *R1 = 0.0732, wR2 = 0.1901                                                                                                        |
| R indices (all data)                                                                         | R1 = 0.0896, *wR2 = 0.2017                                                                                                        |
| R1 = sum  Fo - Fc  /sum Fo , wR2=root(sum(w*D*D)/sum(w*Fo*Fo)),<br>where D = (Fo*Fo - Fc*Fc) |                                                                                                                                   |
| Weighting scheme                                                                             | calc w=1/[\s <sup>2</sup> (Fo <sup>2</sup> )+(0.1155P) <sup>2</sup><br>+10.6657P] where P=(Fo <sup>2</sup> + 2Fc <sup>2</sup> )/3 |
| Largest diff. peak and hole                                                                  | 1.426 and -0.853 e.Å <sup>-3</sup>                                                                                                |

**Table S-5.** Atomic coordinates ( $\times 10^4$ ) and equivalent isotropic displacement parameters ( $\text{Å}^2 \times 10^3$ ) for  $[\text{Fe}(\text{III})(\text{tame}-\text{N}_3)\text{S}_2^{\text{Me}_2}]](\text{PF}_6) \cdot \text{BzCN}$  (**1**).  $U(\text{eq})$  is defined as one third of the trace of the orthogonalized  $U_{ij}$  tensor.

|       | x       | y       | z       | U(eq)  |
|-------|---------|---------|---------|--------|
| Fe(1) | 3909(1) | 7500    | 2175(1) | 30(1)  |
| S(1)  | 4608(1) | 6462(1) | 1274(1) | 44(1)  |
| P(1)  | 5000    | 0       | 5000    | 49(1)  |
| F(1)  | 4469(4) | 813(4)  | 5483(7) | 162(4) |
| F(2)  | 5559(6) | 633(4)  | 4265(4) | 134(3) |
| F(3)  | 5879(5) | 187(4)  | 5710(5) | 133(3) |
| N(1)  | 3049(3) | 6491(3) | 2644(3) | 34(1)  |
| N(2)  | 4517(4) | 7500    | 3608(4) | 37(1)  |
| N(3)  | 3160(7) | 2500    | 6066(7) | 92(3)  |
| C(1)  | 3239(5) | 5269(5) | 521(4)  | 58(2)  |
| C(2)  | 4445(5) | 4680(4) | 1763(6) | 62(2)  |
| C(3)  | 3789(4) | 5479(4) | 1468(4) | 42(1)  |
| C(4)  | 3064(4) | 5690(3) | 2279(4) | 39(1)  |
| C(5)  | 2377(5) | 4958(4) | 2595(5) | 54(2)  |
| C(6)  | 2396(4) | 6651(4) | 3475(4) | 43(1)  |
| C(7)  | 2664(5) | 7500    | 4035(6) | 39(2)  |
| C(8)  | 3752(5) | 7500    | 4386(5) | 37(2)  |
| C(9)  | 2004(7) | 7500    | 4975(6) | 50(2)  |
| C(10) | 2561(6) | 2500    | 4279(7) | 74(3)  |
| C(11) | 3264(7) | 2500    | 3539(6) | 78(3)  |
| C(12) | 2881(8) | 2500    | 2599(8) | 119(6) |
| C(13) | 1878(7) | 2500    | 2352(7) | 78(3)  |
| C(14) | 1215(9) | 2500    | 3129(7) | 98(4)  |
| C(15) | 1544(7) | 2500    | 4086(8) | 88(4)  |
| C(16) | 2887(8) | 2500    | 5245(9) | 76(3)  |

**Table S-6.** Bond lengths [Å] and angles [deg] for [Fe(III)(tame-  
N<sub>3</sub>)S<sub>2</sub><sup>Me2</sup>)](PF<sub>6</sub>)•BzCN (**1**).

---

|              |            |
|--------------|------------|
| Fe(1)-N(1)   | 1.999(4)   |
| Fe(1)-N(1)#1 | 1.999(4)   |
| Fe(1)-N(2)   | 2.132(6)   |
| Fe(1)-S(1)#1 | 2.1886(14) |
| Fe(1)-S(1)   | 2.1887(14) |
| S(1)-C(3)    | 1.848(5)   |
| P(1)-F(1)    | 1.551(5)   |
| P(1)-F(1)#2  | 1.551(5)   |
| P(1)-F(3)#2  | 1.558(5)   |
| P(1)-F(3)    | 1.558(5)   |
| P(1)-F(2)    | 1.571(6)   |
| P(1)-F(2)#2  | 1.571(6)   |
| N(1)-C(4)    | 1.291(6)   |
| N(1)-C(6)    | 1.460(6)   |
| N(2)-C(8)    | 1.484(9)   |
| N(2)-H(2E)   | 0.9200     |
| N(2)-H(2D)   | 0.9200     |
| N(3)-C(16)   | 1.186(14)  |
| C(1)-C(3)    | 1.527(8)   |
| C(1)-H(1A)   | 0.9800     |
| C(1)-H(1B)   | 0.9800     |
| C(1)-H(1C)   | 0.9800     |
| C(2)-C(3)    | 1.533(8)   |
| C(2)-H(2A)   | 0.9800     |
| C(2)-H(2B)   | 0.9800     |
| C(2)-H(2C)   | 0.9800     |
| C(3)-C(4)    | 1.513(7)   |
| C(4)-C(5)    | 1.490(7)   |
| C(5)-H(5A)   | 0.9800     |
| C(5)-H(5B)   | 0.9800     |
| C(5)-H(5C)   | 0.9800     |
| C(6)-C(7)    | 1.520(7)   |
| C(6)-H(6A)   | 0.9900     |
| C(6)-H(6B)   | 0.9900     |
| C(7)-C(6)#1  | 1.520(7)   |
| C(7)-C(8)    | 1.539(10)  |
| C(7)-C(9)    | 1.568(10)  |
| C(8)-H(8A)   | 0.9900     |
| C(8)-H(8B)   | 0.9900     |
| C(9)-H(9A)   | 0.9800     |
| C(9)-H(9B)   | 0.9800     |
| C(9)-H(9C)   | 0.9800     |
| C(10)-C(11)  | 1.388(13)  |

|                     |            |
|---------------------|------------|
| C(10)-C(15)         | 1.393(12)  |
| C(10)-C(16)         | 1.397(15)  |
| C(11)-C(12)         | 1.390(14)  |
| C(11)-H(11)         | 0.9500     |
| C(12)-C(13)         | 1.391(14)  |
| C(12)-H(12)         | 0.9500     |
| C(13)-C(14)         | 1.391(14)  |
| C(13)-H(13)         | 0.9500     |
| C(14)-C(15)         | 1.387(15)  |
| C(14)-H(14)         | 0.9500     |
| C(15)-H(15)         | 0.9500     |
| N(1)-Fe(1)-N(1)#1   | 97.0(2)    |
| N(1)-Fe(1)-N(2)     | 85.62(16)  |
| N(1)#1-Fe(1)-N(2)   | 85.62(16)  |
| N(1)-Fe(1)-S(1)#1   | 163.42(13) |
| N(1)#1-Fe(1)-S(1)#1 | 84.44(12)  |
| N(2)-Fe(1)-S(1)#1   | 110.96(12) |
| N(1)-Fe(1)-S(1)     | 84.44(12)  |
| N(1)#1-Fe(1)-S(1)   | 163.42(13) |
| N(2)-Fe(1)-S(1)     | 110.96(12) |
| S(1)#1-Fe(1)-S(1)   | 89.55(8)   |
| C(3)-S(1)-Fe(1)     | 102.64(17) |
| F(1)-P(1)-F(1)#2    | 179.999(1) |
| F(1)-P(1)-F(3)#2    | 93.2(4)    |
| F(1)#2-P(1)-F(3)#2  | 86.8(4)    |
| F(1)-P(1)-F(3)      | 86.8(4)    |
| F(1)#2-P(1)-F(3)    | 93.2(4)    |
| F(3)#2-P(1)-F(3)    | 179.998(1) |
| F(1)-P(1)-F(2)      | 91.7(4)    |
| F(1)#2-P(1)-F(2)    | 88.3(4)    |
| F(3)#2-P(1)-F(2)    | 93.9(4)    |
| F(3)-P(1)-F(2)      | 86.1(4)    |
| F(1)-P(1)-F(2)#2    | 88.3(4)    |
| F(1)#2-P(1)-F(2)#2  | 91.7(4)    |
| F(3)#2-P(1)-F(2)#2  | 86.1(4)    |
| F(3)-P(1)-F(2)#2    | 93.9(4)    |
| F(2)-P(1)-F(2)#2    | 179.999(1) |
| C(4)-N(1)-C(6)      | 117.6(4)   |
| C(4)-N(1)-Fe(1)     | 123.8(3)   |
| C(6)-N(1)-Fe(1)     | 118.6(3)   |
| C(8)-N(2)-Fe(1)     | 113.5(4)   |
| C(8)-N(2)-H(2E)     | 108.9      |
| Fe(1)-N(2)-H(2E)    | 108.9      |
| C(8)-N(2)-H(2D)     | 108.9      |
| Fe(1)-N(2)-H(2D)    | 108.9      |
| H(2E)-N(2)-H(2D)    | 107.7      |
| C(3)-C(1)-H(1A)     | 109.5      |
| C(3)-C(1)-H(1B)     | 109.5      |

|                  |          |
|------------------|----------|
| H(1A)-C(1)-H(1B) | 109.5    |
| C(3)-C(1)-H(1C)  | 109.5    |
| H(1A)-C(1)-H(1C) | 109.5    |
| H(1B)-C(1)-H(1C) | 109.5    |
| C(3)-C(2)-H(2A)  | 109.5    |
| C(3)-C(2)-H(2B)  | 109.5    |
| H(2A)-C(2)-H(2B) | 109.5    |
| C(3)-C(2)-H(2C)  | 109.5    |
| H(2A)-C(2)-H(2C) | 109.5    |
| H(2B)-C(2)-H(2C) | 109.5    |
| C(4)-C(3)-C(1)   | 110.9(4) |
| C(4)-C(3)-C(2)   | 109.7(5) |
| C(1)-C(3)-C(2)   | 110.3(5) |
| C(4)-C(3)-S(1)   | 109.1(3) |
| C(1)-C(3)-S(1)   | 109.0(4) |
| C(2)-C(3)-S(1)   | 107.8(4) |
| N(1)-C(4)-C(5)   | 123.3(5) |
| N(1)-C(4)-C(3)   | 119.1(4) |
| C(5)-C(4)-C(3)   | 117.5(5) |
| C(4)-C(5)-H(5A)  | 109.5    |
| C(4)-C(5)-H(5B)  | 109.5    |
| H(5A)-C(5)-H(5B) | 109.5    |
| C(4)-C(5)-H(5C)  | 109.5    |
| H(5A)-C(5)-H(5C) | 109.5    |
| H(5B)-C(5)-H(5C) | 109.5    |
| N(1)-C(6)-C(7)   | 112.8(4) |
| N(1)-C(6)-H(6A)  | 109.0    |
| C(7)-C(6)-H(6A)  | 109.0    |
| N(1)-C(6)-H(6B)  | 109.0    |
| C(7)-C(6)-H(6B)  | 109.0    |
| H(6A)-C(6)-H(6B) | 107.8    |
| C(6)-C(7)-C(6)#1 | 112.0(7) |
| C(6)-C(7)-C(8)   | 112.6(4) |
| C(6)#1-C(7)-C(8) | 112.6(4) |
| C(6)-C(7)-C(9)   | 106.4(4) |
| C(6)#1-C(7)-C(9) | 106.4(4) |
| C(8)-C(7)-C(9)   | 106.2(6) |
| N(2)-C(8)-C(7)   | 115.6(6) |
| N(2)-C(8)-H(8A)  | 108.4    |
| C(7)-C(8)-H(8A)  | 108.4    |
| N(2)-C(8)-H(8B)  | 108.4    |
| C(7)-C(8)-H(8B)  | 108.4    |
| H(8A)-C(8)-H(8B) | 107.4    |
| C(7)-C(9)-H(9A)  | 109.5    |
| C(7)-C(9)-H(9B)  | 109.5    |
| H(9A)-C(9)-H(9B) | 109.5    |
| C(7)-C(9)-H(9C)  | 109.5    |
| H(9A)-C(9)-H(9C) | 109.5    |

|                   |           |
|-------------------|-----------|
| H(9B)-C(9)-H(9C)  | 109.5     |
| C(11)-C(10)-C(15) | 121.9(10) |
| C(11)-C(10)-C(16) | 118.8(9)  |
| C(15)-C(10)-C(16) | 119.3(9)  |
| C(10)-C(11)-C(12) | 115.4(11) |
| C(10)-C(11)-H(11) | 122.3     |
| C(12)-C(11)-H(11) | 122.3     |
| C(11)-C(12)-C(13) | 125.9(11) |
| C(11)-C(12)-H(12) | 117.1     |
| C(13)-C(12)-H(12) | 117.1     |
| C(14)-C(13)-C(12) | 115.8(11) |
| C(14)-C(13)-H(13) | 122.1     |
| C(12)-C(13)-H(13) | 122.1     |
| C(15)-C(14)-C(13) | 121.5(11) |
| C(15)-C(14)-H(14) | 119.3     |
| C(13)-C(14)-H(14) | 119.3     |
| C(14)-C(15)-C(10) | 119.6(10) |
| C(14)-C(15)-H(15) | 120.2     |
| C(10)-C(15)-H(15) | 120.2     |
| N(3)-C(16)-C(10)  | 179.7(12) |

---

Symmetry transformations used to generate equivalent atoms:  
 #1  $x, -y+3/2, z$       #2  $-x+1, -y, -z+1$

**Table S-7.** Anisotropic displacement parameters ( $\text{Å}^2 \times 10^3$ ) for  $[\text{Fe}(\text{III})(\text{tame}-\text{N}_3)\text{S}_2^{\text{Me}_2}](\text{PF}_6) \cdot \text{BzCN}$  (**1**). The anisotropic displacement factor exponent takes the form:  $-2 \pi^2 [ h^2 a^*^2 U_{11} + \dots + 2 h k a^* b^* U_{12} ]$

|       | U11     | U22     | U33     | U23    | U13     | U12    |
|-------|---------|---------|---------|--------|---------|--------|
| Fe(1) | 26(1)   | 31(1)   | 33(1)   | 0      | 3(1)    | 0      |
| S(1)  | 38(1)   | 42(1)   | 51(1)   | -12(1) | 15(1)   | -5(1)  |
| P(1)  | 42(1)   | 42(1)   | 65(1)   | -16(1) | -1(1)   | -3(1)  |
| F(1)  | 97(4)   | 83(4)   | 306(11) | -96(5) | 62(5)   | -19(3) |
| F(2)  | 200(6)  | 108(4)  | 94(4)   | -27(3) | 34(4)   | -91(5) |
| F(3)  | 134(5)  | 119(5)  | 146(5)  | -1(4)  | -70(4)  | -58(4) |
| N(1)  | 30(2)   | 35(2)   | 38(2)   | 0(2)   | 4(2)    | -4(2)  |
| N(2)  | 33(3)   | 35(3)   | 43(3)   | 0      | -7(3)   | 0      |
| N(3)  | 66(6)   | 145(10) | 64(6)   | 0      | 1(5)    | 0      |
| C(1)  | 65(4)   | 57(4)   | 53(3)   | -15(3) | 3(3)    | -8(3)  |
| C(2)  | 54(4)   | 46(3)   | 87(5)   | 0(3)   | 17(3)   | 4(3)   |
| C(3)  | 40(3)   | 35(3)   | 51(3)   | -11(2) | 7(2)    | -4(2)  |
| C(4)  | 29(2)   | 40(3)   | 48(3)   | -6(2)  | -1(2)   | -5(2)  |
| C(5)  | 52(3)   | 37(3)   | 74(4)   | -10(3) | 18(3)   | -14(3) |
| C(6)  | 38(3)   | 40(3)   | 50(3)   | -7(2)  | 13(2)   | -8(2)  |
| C(7)  | 41(4)   | 28(3)   | 47(4)   | 0      | 11(3)   | 0      |
| C(8)  | 49(4)   | 32(3)   | 32(3)   | 0      | -3(3)   | 0      |
| C(9)  | 64(5)   | 40(4)   | 47(5)   | 0      | 21(4)   | 0      |
| C(10) | 92(8)   | 51(5)   | 78(7)   | 0      | 0(6)    | 0      |
| C(11) | 69(7)   | 65(6)   | 99(8)   | 0      | -14(6)  | 0      |
| C(12) | 153(14) | 51(6)   | 153(13) | 0      | -97(12) | 0      |
| C(13) | 112(9)  | 65(6)   | 57(6)   | 0      | -9(6)   | 0      |
| C(14) | 112(10) | 93(9)   | 88(9)   | 0      | 49(8)   | 0      |
| C(15) | 62(7)   | 120(10) | 82(8)   | 0      | 14(6)   | 0      |
| C(16) | 67(6)   | 97(8)   | 65(7)   | 0      | 4(5)    | 0      |



**Table S-8.** Hydrogen coordinates (  $\times 10^4$ ) and isotropic displacement parameters ( $\text{Å}^2 \times 10^3$ ) for  $[\text{Fe}(\text{III})(\text{tame-N}_3)\text{S}_2^{\text{Me}_2}](\text{PF}_6) \cdot \text{BzCN}$  (**1**).

|       | x    | y    | z    | U(eq) |
|-------|------|------|------|-------|
| H(2E) | 4914 | 7000 | 3682 | 45    |
| H(2D) | 4914 | 8000 | 3682 | 45    |
| H(1A) | 2834 | 4726 | 607  | 70    |
| H(1B) | 3723 | 5170 | -1   | 70    |
| H(1C) | 2808 | 5778 | 350  | 70    |
| H(2A) | 4038 | 4135 | 1807 | 75    |
| H(2B) | 4751 | 4803 | 2397 | 75    |
| H(2C) | 4967 | 4593 | 1274 | 75    |
| H(5A) | 1711 | 5208 | 2701 | 65    |
| H(5B) | 2622 | 4692 | 3202 | 65    |
| H(5C) | 2346 | 4493 | 2089 | 65    |
| H(6A) | 2432 | 6128 | 3920 | 51    |
| H(6B) | 1702 | 6701 | 3241 | 51    |
| H(8A) | 3856 | 8038 | 4800 | 45    |
| H(8B) | 3856 | 6962 | 4800 | 45    |
| H(9A) | 2150 | 8039 | 5362 | 75    |
| H(9B) | 2149 | 6961 | 5361 | 75    |
| H(9C) | 1300 | 7501 | 4790 | 75    |
| H(11) | 3959 | 2500 | 3667 | 93    |
| H(12) | 3347 | 2500 | 2079 | 143   |
| H(13) | 1660 | 2500 | 1694 | 94    |
| H(14) | 520  | 2500 | 3002 | 118   |
| H(15) | 1079 | 2500 | 4607 | 106   |

**Table S-9.** Crystal data and structure refinement  
for  $(\text{NMe}_4)_2[\text{Fe}(\text{III})(\text{Et}-\text{N}_2\text{S}_2^{\text{Me}_2})]_2 \cdot 2\text{MeOH}$  (**2**).

|                                                                                               |                                                                                                                                  |
|-----------------------------------------------------------------------------------------------|----------------------------------------------------------------------------------------------------------------------------------|
| Empirical formula                                                                             | C30 H64 Fe2 N6 O6 S4                                                                                                             |
| Formula weight                                                                                | 844.81                                                                                                                           |
| Temperature                                                                                   | 161(2) K                                                                                                                         |
| Wavelength                                                                                    | 0.71070 Å                                                                                                                        |
| Crystal description/color                                                                     | prism / red                                                                                                                      |
| Crystal system, space group                                                                   | Monoclinic, P 21/c                                                                                                               |
| Unit cell dimensions                                                                          | a = 15.6210(5)Å alpha = 90 deg.<br>b = 11.8659(6)Å beta = 92.556(2) deg.<br>c = 22.8715(10)Å gamma = 90 deg.                     |
| Volume                                                                                        | 4235.2(3) Å <sup>3</sup>                                                                                                         |
| Z, Calculated density                                                                         | 4, 1.325 Mg/m <sup>3</sup>                                                                                                       |
| Absorption coefficient                                                                        | 0.926 mm <sup>-1</sup>                                                                                                           |
| F(000)                                                                                        | 1800                                                                                                                             |
| Crystal size                                                                                  | 0.18 x 0.13 x 0.10 mm                                                                                                            |
| Reflections for indexing                                                                      | 812                                                                                                                              |
| Theta range for data collection                                                               | 1.93 to 30.02 deg.                                                                                                               |
| Index ranges                                                                                  | -20<=h<=20, -15<=k<=16, -31<=l<=31                                                                                               |
| Reflections collected / unique                                                                | 19609 / 11435 [R(int) = 0.1148]                                                                                                  |
| Completeness to theta = 25.00                                                                 | 98.0%                                                                                                                            |
| Absorption correction                                                                         | Semi-empirical from equivalents                                                                                                  |
| Max. and min. transmission                                                                    | 0.9131 and 0.8510                                                                                                                |
| Refinement method                                                                             | Full-matrix least-squares on F <sup>2</sup>                                                                                      |
| Data / restraints / parameters                                                                | 11435 / 1 / 453                                                                                                                  |
| Goodness-of-fit on F <sup>2</sup>                                                             | S = 1.021                                                                                                                        |
| S = root(sum(w*D*D)/(n-p)), where D = (Fo*Fo - Fc*Fc)                                         |                                                                                                                                  |
| Final R indices [I>2sigma(I)]                                                                 | *R1 = 0.0923, wR2 = 0.2132                                                                                                       |
| R indices (all data)                                                                          | R1 = 0.1908, *wR2 = 0.2514                                                                                                       |
| R1 = sum  Fo - Fc  /sum Fo , wR2= root(sum(w*D*D)/sum(w*Fo*Fo)),<br>where D = (Fo*Fo - Fc*Fc) |                                                                                                                                  |
| Weighting scheme                                                                              | calc w=1/[\s <sup>2</sup> (Fo <sup>2</sup> )+(0.1138P) <sup>2</sup> +0.0000P]<br>where P=(Fo <sup>2</sup> + 2Fc <sup>2</sup> )/3 |
| Largest diff. peak and hole                                                                   | 1.557 and -0.793 e.Å <sup>-3</sup>                                                                                               |

**Table S-10.** Atomic coordinates ( $\times 10^4$ ) and equivalent isotropic displacement parameters ( $\text{Å}^2 \times 10^3$ ) for  $(\text{NMe}_4)_2[\text{Fe}(\text{III})(\text{Et}-\text{N}_2\text{S}_2^{\text{Me}_2})]_2 \cdot 2\text{MeOH}$  (**2**).  $U(\text{eq})$  is defined as one third of the trace of the orthogonalized  $U_{ij}$  tensor.

|       | x        | y        | z        | U(eq) |
|-------|----------|----------|----------|-------|
| C(1)  | 7292(5)  | 4372(7)  | 6043(3)  | 49(2) |
| C(2)  | 8666(4)  | 3466(7)  | 5764(3)  | 47(2) |
| C(3)  | 7748(4)  | 3253(6)  | 5954(3)  | 36(1) |
| C(4)  | 7193(4)  | 2583(6)  | 5501(3)  | 35(1) |
| C(5)  | 5955(4)  | 1409(7)  | 5342(3)  | 46(2) |
| C(6)  | 5140(4)  | 1418(8)  | 5689(3)  | 48(2) |
| C(7)  | 4756(4)  | 1273(6)  | 6687(3)  | 37(2) |
| C(8)  | 5038(4)  | 1151(6)  | 7334(3)  | 37(2) |
| C(9)  | 5040(4)  | -108(6)  | 7489(3)  | 38(2) |
| C(10) | 4425(4)  | 1797(7)  | 7725(3)  | 45(2) |
| C(11) | 7625(4)  | -2412(6) | 6344(3)  | 42(2) |
| C(12) | 6315(4)  | -1532(6) | 5866(3)  | 40(2) |
| C(13) | 7220(4)  | -1311(5) | 6122(3)  | 32(1) |
| C(14) | 7810(4)  | -813(5)  | 5676(3)  | 31(1) |
| C(15) | 9017(4)  | 392(6)   | 5507(3)  | 36(1) |
| C(16) | 9813(4)  | 490(6)   | 5912(3)  | 38(2) |
| C(17) | 10166(4) | 950(6)   | 6910(3)  | 34(1) |
| C(18) | 9879(4)  | 1190(6)  | 7521(3)  | 33(1) |
| C(19) | 9916(4)  | 2454(6)  | 7610(3)  | 36(1) |
| C(20) | 10467(4) | 613(7)   | 7982(3)  | 45(2) |
| C(21) | 7991(5)  | -7025(8) | 8642(4)  | 63(2) |
| C(22) | 7368(4)  | -5540(6) | 8023(3)  | 39(2) |
| C(23) | 7625(4)  | -5225(7) | 9079(3)  | 41(2) |
| C(24) | 6497(4)  | -6489(7) | 8731(3)  | 43(2) |
| C(25) | 7058(4)  | -1745(6) | 9312(3)  | 43(2) |
| C(26) | 8113(4)  | -294(7)  | 9116(3)  | 48(2) |
| C(27) | 6947(5)  | -657(7)  | 8410(3)  | 51(2) |
| C(28) | 8084(5)  | -2026(7) | 8558(3)  | 49(2) |
| C(29) | 5218(6)  | 981(11)  | 9465(5)  | 97(4) |
| C(30) | 9672(5)  | -2089(9) | 10426(4) | 71(3) |
| Fe(1) | 6565(1)  | 1488(1)  | 6535(1)  | 29(1) |
| Fe(2) | 8370(1)  | 632(1)   | 6645(1)  | 27(1) |
| N(1)  | 6636(3)  | 1882(5)  | 5727(2)  | 33(1) |
| N(2)  | 5388(3)  | 1255(5)  | 6324(2)  | 33(1) |
| N(3)  | 8321(3)  | 11(5)    | 5864(2)  | 30(1) |
| N(4)  | 9556(3)  | 801(4)   | 6506(2)  | 27(1) |
| N(5)  | 7361(3)  | -6074(5) | 8619(2)  | 37(1) |
| N(6)  | 7558(3)  | -1183(5) | 8850(2)  | 36(1) |

|      |          |          |         |       |
|------|----------|----------|---------|-------|
| O(1) | 7243(3)  | 2832(5)  | 4967(2) | 48(1) |
| O(2) | 3985(3)  | 1346(5)  | 6530(2) | 46(1) |
| O(3) | 7823(3)  | -1268(4) | 5186(2) | 37(1) |
| O(4) | 10947(3) | 904(4)   | 6816(2) | 43(1) |
| O(5) | 6048(4)  | 674(7)   | 9527(3) | 90(2) |
| O(6) | 9155(4)  | -2341(6) | 9936(2) | 65(2) |
| S(1) | 7760(1)  | 2534(1)  | 6672(1) | 31(1) |
| S(2) | 6132(1)  | 1734(2)  | 7428(1) | 35(1) |
| S(3) | 7167(1)  | -371(1)  | 6767(1) | 30(1) |
| S(4) | 8778(1)  | 665(2)   | 7583(1) | 33(1) |

---

**Table S-11.** Bond lengths [Å] and angles [deg] for (NMe<sub>4</sub>)<sub>2</sub>[Fe(III)(Et-N<sub>2</sub>S<sub>2</sub><sup>Me2</sup>)<sub>2</sub>•2MeOH (2).

---

|              |           |
|--------------|-----------|
| C(1)-C(3)    | 1.524(10) |
| C(1)-H(1A)   | 0.9800    |
| C(1)-H(1B)   | 0.9800    |
| C(1)-H(1C)   | 0.9800    |
| C(2)-C(3)    | 1.538(9)  |
| C(2)-H(2A)   | 0.9800    |
| C(2)-H(2B)   | 0.9800    |
| C(2)-H(2C)   | 0.9800    |
| C(3)-C(4)    | 1.541(9)  |
| C(3)-S(1)    | 1.850(7)  |
| C(4)-O(1)    | 1.261(7)  |
| C(4)-N(1)    | 1.325(8)  |
| C(5)-N(1)    | 1.463(8)  |
| C(5)-C(6)    | 1.531(9)  |
| C(5)-H(5A)   | 0.9900    |
| C(5)-H(5B)   | 0.9900    |
| C(6)-N(2)    | 1.498(8)  |
| C(6)-H(6A)   | 0.9900    |
| C(6)-H(6B)   | 0.9900    |
| C(7)-O(2)    | 1.245(7)  |
| C(7)-N(2)    | 1.318(8)  |
| C(7)-C(8)    | 1.531(9)  |
| C(8)-C(9)    | 1.535(10) |
| C(8)-C(10)   | 1.543(9)  |
| C(8)-S(2)    | 1.847(6)  |
| C(9)-H(9A)   | 0.9800    |
| C(9)-H(9B)   | 0.9800    |
| C(9)-H(9C)   | 0.9800    |
| C(10)-H(10A) | 0.9800    |
| C(10)-H(10B) | 0.9800    |
| C(10)-H(10C) | 0.9800    |
| C(11)-C(13)  | 1.528(9)  |
| C(11)-H(11A) | 0.9800    |
| C(11)-H(11B) | 0.9800    |
| C(11)-H(11C) | 0.9800    |
| C(12)-C(13)  | 1.528(8)  |
| C(12)-H(12A) | 0.9800    |
| C(12)-H(12B) | 0.9800    |
| C(12)-H(12C) | 0.9800    |
| C(13)-C(14)  | 1.525(8)  |
| C(13)-S(3)   | 1.853(6)  |
| C(14)-O(3)   | 1.244(7)  |
| C(14)-N(3)   | 1.323(8)  |
| C(15)-N(3)   | 1.460(7)  |

|              |          |
|--------------|----------|
| C(15)-C(16)  | 1.522(8) |
| C(15)-H(15A) | 0.9900   |
| C(15)-H(15B) | 0.9900   |
| C(16)-N(4)   | 1.481(7) |
| C(16)-H(16A) | 0.9900   |
| C(16)-H(16B) | 0.9900   |
| C(17)-O(4)   | 1.249(7) |
| C(17)-N(4)   | 1.309(7) |
| C(17)-C(18)  | 1.515(9) |
| C(18)-C(19)  | 1.515(9) |
| C(18)-C(20)  | 1.528(9) |
| C(18)-S(4)   | 1.841(6) |
| C(19)-H(19A) | 0.9800   |
| C(19)-H(19B) | 0.9800   |
| C(19)-H(19C) | 0.9800   |
| C(20)-H(20A) | 0.9800   |
| C(20)-H(20B) | 0.9800   |
| C(20)-H(20C) | 0.9800   |
| C(21)-N(5)   | 1.496(9) |
| C(21)-H(21A) | 0.9800   |
| C(21)-H(21B) | 0.9800   |
| C(21)-H(21C) | 0.9800   |
| C(22)-N(5)   | 1.504(8) |
| C(22)-H(22A) | 0.9800   |
| C(22)-H(22B) | 0.9800   |
| C(22)-H(22C) | 0.9800   |
| C(23)-N(5)   | 1.502(8) |
| C(23)-H(23A) | 0.9800   |
| C(23)-H(23B) | 0.9800   |
| C(23)-H(23C) | 0.9800   |
| C(24)-N(5)   | 1.470(8) |
| C(24)-H(24A) | 0.9800   |
| C(24)-H(24B) | 0.9800   |
| C(24)-H(24C) | 0.9800   |
| C(25)-N(6)   | 1.500(8) |
| C(25)-H(25A) | 0.9800   |
| C(25)-H(25B) | 0.9800   |
| C(25)-H(25C) | 0.9800   |
| C(26)-N(6)   | 1.479(9) |
| C(26)-H(26A) | 0.9800   |
| C(26)-H(26B) | 0.9800   |
| C(26)-H(26C) | 0.9800   |
| C(27)-N(6)   | 1.492(8) |
| C(27)-H(27A) | 0.9800   |
| C(27)-H(27B) | 0.9800   |
| C(27)-H(27C) | 0.9800   |
| C(28)-N(6)   | 1.472(9) |
| C(28)-H(28A) | 0.9800   |

|                  |            |
|------------------|------------|
| C(28)-H(28B)     | 0.9800     |
| C(28)-H(28C)     | 0.9800     |
| C(29)-O(5)       | 1.349(11)  |
| C(29)-H(29A)     | 0.9800     |
| C(29)-H(29B)     | 0.9800     |
| C(29)-H(29C)     | 0.9800     |
| C(30)-O(6)       | 1.385(9)   |
| C(30)-H(30A)     | 0.9800     |
| C(30)-H(30B)     | 0.9800     |
| C(30)-H(30C)     | 0.9800     |
| Fe(1)-N(2)       | 1.900(4)   |
| Fe(1)-N(1)       | 1.915(5)   |
| Fe(1)-S(2)       | 2.1993(17) |
| Fe(1)-S(1)       | 2.2513(17) |
| Fe(1)-S(3)       | 2.4464(18) |
| Fe(2)-N(4)       | 1.904(4)   |
| Fe(2)-N(3)       | 1.930(5)   |
| Fe(2)-S(4)       | 2.2104(16) |
| Fe(2)-S(3)       | 2.2520(16) |
| Fe(2)-S(1)       | 2.4513(18) |
| O(5)-H(5)        | 1.0100     |
| O(6)-H(6)        | 1.0100     |
| C(3)-C(1)-H(1A)  | 109.5      |
| C(3)-C(1)-H(1B)  | 109.5      |
| H(1A)-C(1)-H(1B) | 109.5      |
| C(3)-C(1)-H(1C)  | 109.5      |
| H(1A)-C(1)-H(1C) | 109.5      |
| H(1B)-C(1)-H(1C) | 109.5      |
| C(3)-C(2)-H(2A)  | 109.5      |
| C(3)-C(2)-H(2B)  | 109.5      |
| H(2A)-C(2)-H(2B) | 109.5      |
| C(3)-C(2)-H(2C)  | 109.5      |
| H(2A)-C(2)-H(2C) | 109.5      |
| H(2B)-C(2)-H(2C) | 109.5      |
| C(1)-C(3)-C(2)   | 110.0(6)   |
| C(1)-C(3)-C(4)   | 106.7(5)   |
| C(2)-C(3)-C(4)   | 113.5(5)   |
| C(1)-C(3)-S(1)   | 105.6(4)   |
| C(2)-C(3)-S(1)   | 110.7(5)   |
| C(4)-C(3)-S(1)   | 110.0(5)   |
| O(1)-C(4)-N(1)   | 126.4(6)   |
| O(1)-C(4)-C(3)   | 118.2(6)   |
| N(1)-C(4)-C(3)   | 114.9(5)   |
| N(1)-C(5)-C(6)   | 106.5(5)   |
| N(1)-C(5)-H(5A)  | 110.4      |
| C(6)-C(5)-H(5A)  | 110.4      |
| N(1)-C(5)-H(5B)  | 110.4      |
| C(6)-C(5)-H(5B)  | 110.4      |

|                     |          |
|---------------------|----------|
| H(5A)-C(5)-H(5B)    | 108.6    |
| N(2)-C(6)-C(5)      | 108.4(5) |
| N(2)-C(6)-H(6A)     | 110.0    |
| C(5)-C(6)-H(6A)     | 110.0    |
| N(2)-C(6)-H(6B)     | 110.0    |
| C(5)-C(6)-H(6B)     | 110.0    |
| H(6A)-C(6)-H(6B)    | 108.4    |
| O(2)-C(7)-N(2)      | 124.2(6) |
| O(2)-C(7)-C(8)      | 121.2(6) |
| N(2)-C(7)-C(8)      | 114.6(5) |
| C(7)-C(8)-C(9)      | 108.3(6) |
| C(7)-C(8)-C(10)     | 110.8(5) |
| C(9)-C(8)-C(10)     | 110.1(5) |
| C(7)-C(8)-S(2)      | 107.5(4) |
| C(9)-C(8)-S(2)      | 110.2(4) |
| C(10)-C(8)-S(2)     | 109.9(5) |
| C(8)-C(9)-H(9A)     | 109.5    |
| C(8)-C(9)-H(9B)     | 109.5    |
| H(9A)-C(9)-H(9B)    | 109.5    |
| C(8)-C(9)-H(9C)     | 109.5    |
| H(9A)-C(9)-H(9C)    | 109.5    |
| H(9B)-C(9)-H(9C)    | 109.5    |
| C(8)-C(10)-H(10A)   | 109.5    |
| C(8)-C(10)-H(10B)   | 109.5    |
| H(10A)-C(10)-H(10B) | 109.5    |
| C(8)-C(10)-H(10C)   | 109.5    |
| H(10A)-C(10)-H(10C) | 109.5    |
| H(10B)-C(10)-H(10C) | 109.5    |
| C(13)-C(11)-H(11A)  | 109.5    |
| C(13)-C(11)-H(11B)  | 109.5    |
| H(11A)-C(11)-H(11B) | 109.5    |
| C(13)-C(11)-H(11C)  | 109.5    |
| H(11A)-C(11)-H(11C) | 109.5    |
| H(11B)-C(11)-H(11C) | 109.5    |
| C(13)-C(12)-H(12A)  | 109.5    |
| C(13)-C(12)-H(12B)  | 109.5    |
| H(12A)-C(12)-H(12B) | 109.5    |
| C(13)-C(12)-H(12C)  | 109.5    |
| H(12A)-C(12)-H(12C) | 109.5    |
| H(12B)-C(12)-H(12C) | 109.5    |
| C(14)-C(13)-C(11)   | 107.4(5) |
| C(14)-C(13)-C(12)   | 112.7(5) |
| C(11)-C(13)-C(12)   | 110.1(6) |
| C(14)-C(13)-S(3)    | 110.4(4) |
| C(11)-C(13)-S(3)    | 106.5(4) |
| C(12)-C(13)-S(3)    | 109.5(4) |
| O(3)-C(14)-N(3)     | 125.5(6) |
| O(3)-C(14)-C(13)    | 118.0(6) |



|                     |          |
|---------------------|----------|
| N(3)-C(14)-C(13)    | 116.3(5) |
| N(3)-C(15)-C(16)    | 106.9(5) |
| N(3)-C(15)-H(15A)   | 110.3    |
| C(16)-C(15)-H(15A)  | 110.3    |
| N(3)-C(15)-H(15B)   | 110.3    |
| C(16)-C(15)-H(15B)  | 110.3    |
| H(15A)-C(15)-H(15B) | 108.6    |
| N(4)-C(16)-C(15)    | 109.3(5) |
| N(4)-C(16)-H(16A)   | 109.8    |
| C(15)-C(16)-H(16A)  | 109.8    |
| N(4)-C(16)-H(16B)   | 109.8    |
| C(15)-C(16)-H(16B)  | 109.8    |
| H(16A)-C(16)-H(16B) | 108.3    |
| O(4)-C(17)-N(4)     | 124.0(6) |
| O(4)-C(17)-C(18)    | 119.9(5) |
| N(4)-C(17)-C(18)    | 116.1(5) |
| C(19)-C(18)-C(17)   | 107.4(5) |
| C(19)-C(18)-C(20)   | 109.5(5) |
| C(17)-C(18)-C(20)   | 111.0(5) |
| C(19)-C(18)-S(4)    | 110.8(4) |
| C(17)-C(18)-S(4)    | 108.8(4) |
| C(20)-C(18)-S(4)    | 109.3(5) |
| C(18)-C(19)-H(19A)  | 109.5    |
| C(18)-C(19)-H(19B)  | 109.5    |
| H(19A)-C(19)-H(19B) | 109.5    |
| C(18)-C(19)-H(19C)  | 109.5    |
| H(19A)-C(19)-H(19C) | 109.5    |
| H(19B)-C(19)-H(19C) | 109.5    |
| C(18)-C(20)-H(20A)  | 109.5    |
| C(18)-C(20)-H(20B)  | 109.5    |
| H(20A)-C(20)-H(20B) | 109.5    |
| C(18)-C(20)-H(20C)  | 109.5    |
| H(20A)-C(20)-H(20C) | 109.5    |
| H(20B)-C(20)-H(20C) | 109.5    |
| N(5)-C(21)-H(21A)   | 109.5    |
| N(5)-C(21)-H(21B)   | 109.5    |
| H(21A)-C(21)-H(21B) | 109.5    |
| N(5)-C(21)-H(21C)   | 109.5    |
| H(21A)-C(21)-H(21C) | 109.5    |
| H(21B)-C(21)-H(21C) | 109.5    |
| N(5)-C(22)-H(22A)   | 109.5    |
| N(5)-C(22)-H(22B)   | 109.5    |
| H(22A)-C(22)-H(22B) | 109.5    |
| N(5)-C(22)-H(22C)   | 109.5    |
| H(22A)-C(22)-H(22C) | 109.5    |
| H(22B)-C(22)-H(22C) | 109.5    |
| N(5)-C(23)-H(23A)   | 109.5    |
| N(5)-C(23)-H(23B)   | 109.5    |

|                     |           |
|---------------------|-----------|
| H(23A)-C(23)-H(23B) | 109.5     |
| N(5)-C(23)-H(23C)   | 109.5     |
| H(23A)-C(23)-H(23C) | 109.5     |
| H(23B)-C(23)-H(23C) | 109.5     |
| N(5)-C(24)-H(24A)   | 109.5     |
| N(5)-C(24)-H(24B)   | 109.5     |
| H(24A)-C(24)-H(24B) | 109.5     |
| N(5)-C(24)-H(24C)   | 109.5     |
| H(24A)-C(24)-H(24C) | 109.5     |
| H(24B)-C(24)-H(24C) | 109.5     |
| N(6)-C(25)-H(25A)   | 109.5     |
| N(6)-C(25)-H(25B)   | 109.5     |
| H(25A)-C(25)-H(25B) | 109.5     |
| N(6)-C(25)-H(25C)   | 109.5     |
| H(25A)-C(25)-H(25C) | 109.5     |
| H(25B)-C(25)-H(25C) | 109.5     |
| N(6)-C(26)-H(26A)   | 109.5     |
| N(6)-C(26)-H(26B)   | 109.5     |
| H(26A)-C(26)-H(26B) | 109.5     |
| N(6)-C(26)-H(26C)   | 109.5     |
| H(26A)-C(26)-H(26C) | 109.5     |
| H(26B)-C(26)-H(26C) | 109.5     |
| N(6)-C(27)-H(27A)   | 109.5     |
| N(6)-C(27)-H(27B)   | 109.5     |
| H(27A)-C(27)-H(27B) | 109.5     |
| N(6)-C(27)-H(27C)   | 109.5     |
| H(27A)-C(27)-H(27C) | 109.5     |
| H(27B)-C(27)-H(27C) | 109.5     |
| N(6)-C(28)-H(28A)   | 109.5     |
| N(6)-C(28)-H(28B)   | 109.5     |
| H(28A)-C(28)-H(28B) | 109.5     |
| N(6)-C(28)-H(28C)   | 109.5     |
| H(28A)-C(28)-H(28C) | 109.5     |
| H(28B)-C(28)-H(28C) | 109.5     |
| O(5)-C(29)-H(29A)   | 109.5     |
| O(5)-C(29)-H(29B)   | 109.5     |
| H(29A)-C(29)-H(29B) | 109.5     |
| O(5)-C(29)-H(29C)   | 109.5     |
| H(29A)-C(29)-H(29C) | 109.5     |
| H(29B)-C(29)-H(29C) | 109.5     |
| O(6)-C(30)-H(30A)   | 109.5     |
| O(6)-C(30)-H(30B)   | 109.5     |
| H(30A)-C(30)-H(30B) | 109.5     |
| O(6)-C(30)-H(30C)   | 109.5     |
| H(30A)-C(30)-H(30C) | 109.5     |
| H(30B)-C(30)-H(30C) | 109.5     |
| N(2)-Fe(1)-N(1)     | 83.5(2)   |
| N(2)-Fe(1)-S(2)     | 85.43(16) |

|                  |            |
|------------------|------------|
| N(1)-Fe(1)-S(2)  | 153.82(18) |
| N(2)-Fe(1)-S(1)  | 154.47(18) |
| N(1)-Fe(1)-S(1)  | 85.20(15)  |
| S(2)-Fe(1)-S(1)  | 94.93(6)   |
| N(2)-Fe(1)-S(3)  | 106.34(18) |
| N(1)-Fe(1)-S(3)  | 113.02(18) |
| S(2)-Fe(1)-S(3)  | 92.85(6)   |
| S(1)-Fe(1)-S(3)  | 99.14(6)   |
| N(4)-Fe(2)-N(3)  | 83.36(19)  |
| N(4)-Fe(2)-S(4)  | 85.35(15)  |
| N(3)-Fe(2)-S(4)  | 154.43(17) |
| N(4)-Fe(2)-S(3)  | 154.12(17) |
| N(3)-Fe(2)-S(3)  | 85.06(15)  |
| S(4)-Fe(2)-S(3)  | 95.50(6)   |
| N(4)-Fe(2)-S(1)  | 106.81(16) |
| N(3)-Fe(2)-S(1)  | 112.04(17) |
| S(4)-Fe(2)-S(1)  | 93.18(6)   |
| S(3)-Fe(2)-S(1)  | 98.98(6)   |
| C(4)-N(1)-C(5)   | 118.6(5)   |
| C(4)-N(1)-Fe(1)  | 126.6(4)   |
| C(5)-N(1)-Fe(1)  | 114.5(4)   |
| C(7)-N(2)-C(6)   | 116.1(5)   |
| C(7)-N(2)-Fe(1)  | 125.5(4)   |
| C(6)-N(2)-Fe(1)  | 115.7(4)   |
| C(14)-N(3)-C(15) | 120.0(5)   |
| C(14)-N(3)-Fe(2) | 125.6(4)   |
| C(15)-N(3)-Fe(2) | 113.6(4)   |
| C(17)-N(4)-C(16) | 117.5(5)   |
| C(17)-N(4)-Fe(2) | 125.5(4)   |
| C(16)-N(4)-Fe(2) | 115.6(4)   |
| C(24)-N(5)-C(21) | 110.3(6)   |
| C(24)-N(5)-C(23) | 109.1(5)   |
| C(21)-N(5)-C(23) | 108.8(5)   |
| C(24)-N(5)-C(22) | 110.1(5)   |
| C(21)-N(5)-C(22) | 108.7(5)   |
| C(23)-N(5)-C(22) | 109.9(6)   |
| C(28)-N(6)-C(26) | 110.0(5)   |
| C(28)-N(6)-C(27) | 109.4(5)   |
| C(26)-N(6)-C(27) | 109.0(6)   |
| C(28)-N(6)-C(25) | 109.6(6)   |
| C(26)-N(6)-C(25) | 109.9(5)   |
| C(27)-N(6)-C(25) | 108.9(5)   |
| C(29)-O(5)-H(5)  | 109.5      |
| C(30)-O(6)-H(6)  | 109.5      |
| C(3)-S(1)-Fe(1)  | 98.9(2)    |
| C(3)-S(1)-Fe(2)  | 113.0(2)   |
| Fe(1)-S(1)-Fe(2) | 79.04(6)   |
| C(8)-S(2)-Fe(1)  | 99.4(2)    |

|                  |           |
|------------------|-----------|
| C(13)-S(3)-Fe(2) | 98.80(19) |
| C(13)-S(3)-Fe(1) | 113.7(2)  |
| Fe(2)-S(3)-Fe(1) | 79.13(6)  |
| C(18)-S(4)-Fe(2) | 99.32(19) |

---

**Table S-12.** Anisotropic displacement parameters ( $\text{\AA}^2 \times 10^3$ ) for  $(\text{NMe}_4)_2[\text{Fe}(\text{III})(\text{Et-N}_2\text{S}_2^{\text{Me}_2})]_2 \cdot 2\text{MeOH}$  (**2**). The anisotropic displacement factor exponent takes the form:  $-2 \pi^2 [h^2 a^{*2} U_{11} + \dots + 2 h k a^* b^* U_{12}]$

|       | U11   | U22    | U33    | U23    | U13    | U12    |
|-------|-------|--------|--------|--------|--------|--------|
| C(1)  | 74(5) | 37(5)  | 36(4)  | -1(3)  | -4(3)  | 2(4)   |
| C(2)  | 48(4) | 53(5)  | 39(4)  | 3(4)   | -2(3)  | -10(3) |
| C(3)  | 46(4) | 26(4)  | 38(3)  | -7(3)  | 2(3)   | -5(3)  |
| C(4)  | 46(4) | 33(4)  | 26(3)  | -2(3)  | 1(2)   | 8(3)   |
| C(5)  | 51(4) | 63(6)  | 24(3)  | -7(3)  | 1(3)   | -10(4) |
| C(6)  | 31(3) | 72(6)  | 39(4)  | 11(4)  | -9(3)  | -4(3)  |
| C(7)  | 39(4) | 28(4)  | 44(4)  | 2(3)   | -3(3)  | 7(3)   |
| C(8)  | 33(3) | 43(4)  | 35(3)  | -2(3)  | 5(3)   | -3(3)  |
| C(9)  | 41(3) | 36(4)  | 36(3)  | -1(3)  | 3(3)   | 0(3)   |
| C(10) | 46(4) | 45(5)  | 46(4)  | -14(4) | 14(3)  | 2(3)   |
| C(11) | 61(4) | 23(4)  | 43(4)  | 8(3)   | 10(3)  | 3(3)   |
| C(12) | 39(3) | 40(4)  | 39(3)  | -12(3) | 2(3)   | -8(3)  |
| C(13) | 40(3) | 25(3)  | 31(3)  | 2(3)   | 5(2)   | -4(2)  |
| C(14) | 36(3) | 26(3)  | 32(3)  | 1(3)   | -1(2)  | 7(2)   |
| C(15) | 45(4) | 34(4)  | 29(3)  | -3(3)  | 9(3)   | -13(3) |
| C(16) | 35(3) | 44(4)  | 36(3)  | -7(3)  | 13(3)  | -3(3)  |
| C(17) | 34(3) | 29(4)  | 39(3)  | 2(3)   | 2(3)   | -2(3)  |
| C(18) | 33(3) | 38(4)  | 29(3)  | -3(3)  | 0(2)   | -4(3)  |
| C(19) | 48(4) | 24(3)  | 36(3)  | 3(3)   | 1(3)   | -5(3)  |
| C(20) | 51(4) | 39(4)  | 44(4)  | -1(3)  | -10(3) | 0(3)   |
| C(21) | 80(6) | 50(6)  | 58(5)  | 4(4)   | 10(4)  | 28(4)  |
| C(22) | 43(4) | 40(4)  | 33(3)  | 3(3)   | 5(3)   | -5(3)  |
| C(23) | 44(4) | 48(5)  | 29(3)  | -14(3) | -6(3)  | 2(3)   |
| C(24) | 58(4) | 47(5)  | 25(3)  | -10(3) | 6(3)   | -13(3) |
| C(25) | 51(4) | 39(4)  | 39(3)  | 8(3)   | 5(3)   | -1(3)  |
| C(26) | 56(4) | 45(5)  | 42(4)  | 1(3)   | -1(3)  | -8(3)  |
| C(27) | 59(4) | 55(5)  | 37(4)  | 14(4)  | -5(3)  | 8(4)   |
| C(28) | 60(5) | 40(5)  | 48(4)  | -8(4)  | 0(3)   | 7(3)   |
| C(29) | 78(7) | 93(10) | 120(9) | -29(8) | -4(6)  | -5(6)  |
| C(30) | 81(6) | 67(7)  | 64(5)  | -5(5)  | -4(5)  | -23(5) |
| Fe(1) | 31(1) | 30(1)  | 26(1)  | -3(1)  | 0(1)   | 0(1)   |
| Fe(2) | 30(1) | 27(1)  | 26(1)  | -2(1)  | 3(1)   | -2(1)  |
| N(1)  | 34(3) | 34(3)  | 32(3)  | -5(2)  | 1(2)   | -5(2)  |
| N(2)  | 25(2) | 36(3)  | 37(3)  | 1(2)   | -6(2)  | -2(2)  |
| N(3)  | 29(2) | 36(3)  | 25(2)  | 1(2)   | 5(2)   | -6(2)  |
| N(4)  | 26(2) | 26(3)  | 30(2)  | -6(2)  | 6(2)   | -5(2)  |
| N(5)  | 45(3) | 35(3)  | 31(3)  | -9(2)  | 3(2)   | 5(2)   |
| N(6)  | 42(3) | 38(3)  | 27(2)  | 2(2)   | 2(2)   | 4(2)   |

|      |       |       |        |        |       |        |
|------|-------|-------|--------|--------|-------|--------|
| O(1) | 52(3) | 60(4) | 31(2)  | -5(2)  | 3(2)  | -14(2) |
| O(2) | 30(2) | 58(4) | 49(3)  | 10(3)  | -1(2) | -3(2)  |
| O(3) | 50(3) | 36(3) | 25(2)  | -5(2)  | 0(2)  | -5(2)  |
| O(4) | 27(2) | 49(3) | 51(3)  | -4(2)  | -2(2) | 0(2)   |
| O(5) | 86(5) | 71(5) | 114(6) | -38(5) | 1(4)  | 12(4)  |
| O(6) | 70(4) | 70(4) | 54(3)  | 18(3)  | 3(3)  | -12(3) |
| S(1) | 35(1) | 27(1) | 31(1)  | -3(1)  | -1(1) | -1(1)  |
| S(2) | 40(1) | 36(1) | 28(1)  | -7(1)  | 3(1)  | -4(1)  |
| S(3) | 32(1) | 25(1) | 32(1)  | -2(1)  | 4(1)  | -4(1)  |
| S(4) | 38(1) | 36(1) | 27(1)  | 1(1)   | 2(1)  | -5(1)  |

---

**Table S-13.** Hydrogen coordinates (  $\times 10^4$ ) and isotropic displacement parameters ( $\text{\AA}^2 \times 10^3$ ) for  $(\text{NMe}_4)_2[\text{Fe}(\text{III})(\text{Et-N}_2\text{S}_2^{\text{Me}_2})]_2 \cdot 2\text{MeOH}$  (**2**).

|        | x     | y     | z    | U(eq) |
|--------|-------|-------|------|-------|
| H(1A)  | 7289  | 4811  | 5680 | 74    |
| H(1B)  | 7593  | 4795  | 6358 | 74    |
| H(1C)  | 6701  | 4229  | 6150 | 74    |
| H(2A)  | 8647  | 3859  | 5387 | 70    |
| H(2B)  | 8963  | 2744  | 5726 | 70    |
| H(2C)  | 8974  | 3930  | 6059 | 70    |
| H(5A)  | 6100  | 629   | 5228 | 51    |
| H(5B)  | 5875  | 1869  | 4983 | 51    |
| H(6A)  | 4837  | 2146  | 5632 | 53    |
| H(6B)  | 4751  | 806   | 5551 | 53    |
| H(9A)  | 4467  | -422  | 7407 | 57    |
| H(9B)  | 5200  | -202  | 7905 | 57    |
| H(9C)  | 5454  | -503  | 7253 | 57    |
| H(10A) | 3860  | 1439  | 7702 | 67    |
| H(10B) | 4375  | 2580  | 7592 | 67    |
| H(10C) | 4653  | 1781  | 8132 | 67    |
| H(11A) | 7716  | -2913 | 6012 | 63    |
| H(11B) | 7243  | -2778 | 6614 | 63    |
| H(11C) | 8176  | -2250 | 6548 | 63    |
| H(12A) | 6344  | -2024 | 5524 | 59    |
| H(12B) | 6046  | -816  | 5749 | 59    |
| H(12C) | 5974  | -1898 | 6162 | 59    |
| H(15A) | 8874  | 1132  | 5328 | 39    |
| H(15B) | 9114  | -156  | 5191 | 39    |
| H(16A) | 10123 | -238  | 5927 | 42    |
| H(16B) | 10201 | 1072  | 5762 | 42    |
| H(19A) | 10492 | 2728  | 7534 | 54    |
| H(19B) | 9781  | 2635  | 8013 | 54    |
| H(19C) | 9498  | 2819  | 7339 | 54    |
| H(20A) | 11052 | 899   | 7954 | 68    |
| H(20B) | 10462 | -203  | 7914 | 68    |
| H(20C) | 10264 | 772   | 8373 | 68    |
| H(21A) | 8003  | -7369 | 9032 | 94    |
| H(21B) | 8562  | -6738 | 8562 | 94    |
| H(21C) | 7819  | -7591 | 8348 | 94    |
| H(22A) | 7019  | -4853 | 8018 | 58    |
| H(22B) | 7131  | -6069 | 7729 | 58    |
| H(22C) | 7958  | -5349 | 7932 | 58    |
| H(23A) | 7210  | -4604 | 9072 | 61    |
| H(23B) | 8194  | -4930 | 9001 | 61    |

|        |       |       |       |     |
|--------|-------|-------|-------|-----|
| H(23C) | 7641  | -5586 | 9465  | 61  |
| H(24A) | 6106  | -5849 | 8761  | 65  |
| H(24B) | 6514  | -6914 | 9099  | 65  |
| H(24C) | 6297  | -6981 | 8410  | 65  |
| H(25A) | 6681  | -1192 | 9488  | 64  |
| H(25B) | 7454  | -2055 | 9615  | 64  |
| H(25C) | 6712  | -2356 | 9136  | 64  |
| H(26A) | 7760  | 252   | 9318  | 72  |
| H(26B) | 8420  | 90    | 8809  | 72  |
| H(26C) | 8527  | -636  | 9398  | 72  |
| H(27A) | 6566  | -140  | 8609  | 76  |
| H(27B) | 6606  | -1246 | 8211  | 76  |
| H(27C) | 7268  | -238  | 8122  | 76  |
| H(28A) | 8448  | -2421 | 8852  | 74  |
| H(28B) | 8444  | -1649 | 8278  | 74  |
| H(28C) | 7708  | -2570 | 8351  | 74  |
| H(29A) | 5030  | 1292  | 9835  | 146 |
| H(29B) | 4868  | 321   | 9358  | 146 |
| H(29C) | 5151  | 1553  | 9158  | 146 |
| H(30A) | 9575  | -1306 | 10543 | 106 |
| H(30B) | 10275 | -2187 | 10335 | 106 |
| H(30C) | 9533  | -2594 | 10747 | 106 |
| H(5)   | 6382  | 1280  | 9748  | 136 |
| H(6)   | 8765  | -2990 | 10027 | 97  |

---



**Table S-14.** Crystal data and structure refinement for (NMe<sub>4</sub>) [Fe<sup>III</sup>(Et-N<sub>2</sub>)S<sub>2</sub><sup>Me2</sup>](Py)]•2MeOH (3).

|                                                                                               |                                                                                                                                   |
|-----------------------------------------------------------------------------------------------|-----------------------------------------------------------------------------------------------------------------------------------|
| Empirical formula                                                                             | C20.73 H39.90 Fe N4 O3.72 S2                                                                                                      |
| Formula weight                                                                                | 524.76                                                                                                                            |
| Temperature                                                                                   | 130(2) K                                                                                                                          |
| Wavelength                                                                                    | 0.71070 Å                                                                                                                         |
| Crystal description/color                                                                     | prism / brown                                                                                                                     |
| Crystal system, space group                                                                   | Monoclinic, P 21/c                                                                                                                |
| Unit cell dimensions                                                                          | a = 9.0629(3)Å alpha = 90 deg.<br>b = 11.0976(3)Å beta = 93.4992(18)deg.<br>c = 26.0129(9)Å gamma = 90 deg.                       |
| Volume                                                                                        | 2611.41(14) Å <sup>3</sup>                                                                                                        |
| Z, Calculated density                                                                         | 4, 1.335 Mg/m <sup>3</sup>                                                                                                        |
| Absorption coefficient                                                                        | 0.768 mm <sup>-1</sup>                                                                                                            |
| F(000)                                                                                        | 1120.2                                                                                                                            |
| Crystal size                                                                                  | 0.17 x 0.12 x 0.10 mm                                                                                                             |
| Reflections for indexing                                                                      | 170                                                                                                                               |
| Theta range for data collection                                                               | 2.00 to 24.79 deg.                                                                                                                |
| Index ranges                                                                                  | 0<=h<=10, -13<=k<=13, -30<=l<=30                                                                                                  |
| Reflections collected / unique                                                                | 8560 / 4427 [R(int) = 0.0619]                                                                                                     |
| Completeness to theta = 25.00                                                                 | 98.5%                                                                                                                             |
| Absorption correction                                                                         | Semi-empirical from equivalents                                                                                                   |
| Max. and min. transmission                                                                    | 0.9271 and 0.8805                                                                                                                 |
| Refinement method                                                                             | Full-matrix least-squares on F <sup>2</sup>                                                                                       |
| Data / restraints / parameters                                                                | 4427 / 0 / 304                                                                                                                    |
| Goodness-of-fit on F <sup>2</sup>                                                             | S = 0.935                                                                                                                         |
| S = root(sum(w*D*D)/(n-p)), where D = (Fo*Fo - Fc*Fc)                                         |                                                                                                                                   |
| Final R indices [I>2sigma(I)]                                                                 | *R1 = 0.0446, wR2 = 0.0934                                                                                                        |
| R indices (all data)                                                                          | R1 = 0.0899, *wR2 = 0.1047                                                                                                        |
| *Report these R factors.                                                                      |                                                                                                                                   |
| R1 = sum  Fo - Fc  /sum Fo , wR2= root(sum(w*D*D)/sum(w*Fo*Fo)),<br>where D = (Fo*Fo - Fc*Fc) |                                                                                                                                   |
| Weighting scheme                                                                              | calc w=1/[\s <sup>2</sup> (Fo <sup>2</sup> )+( 0.0481P) <sup>2</sup> +0.0000P]<br>where P=(Fo <sup>2</sup> + 2Fc <sup>2</sup> )/3 |
| Extinction coefficient                                                                        | 0.0051(9)                                                                                                                         |
| Largest diff. peak and hole                                                                   | 0.514 and -0.314 e.Å <sup>-3</sup>                                                                                                |

**Table S-15.** Atomic coordinates ( $\times 10^4$ ) and equivalent isotropic displacement parameters ( $\text{Å}^2 \times 10^3$ ) for  $(\text{NMe}_4)[\text{Fe}^{\text{III}}(\text{Et-N}_2)\text{S}_2^{\text{Me}_2}](\text{Py})] \cdot 2\text{MeOH}$  (**3**).  $U(\text{eq})$  is defined as one third of the trace of the orthogonalized  $U_{ij}$  tensor.

|       | x        | y        | z       | U(eq)  |
|-------|----------|----------|---------|--------|
| C(1)  | 8293(4)  | 1306(4)  | 5907(2) | 43(1)  |
| C(2)  | 7105(5)  | 3308(3)  | 6039(2) | 45(1)  |
| C(3)  | 6878(4)  | 1949(3)  | 6033(1) | 31(1)  |
| C(4)  | 5658(4)  | 1655(3)  | 5624(1) | 31(1)  |
| C(5)  | 3218(4)  | 836(3)   | 5411(1) | 31(1)  |
| C(6)  | 2247(4)  | -71(3)   | 5674(1) | 35(1)  |
| C(7)  | 1499(4)  | -475(3)  | 6526(1) | 33(1)  |
| C(8)  | 1642(4)  | -190(3)  | 7102(1) | 31(1)  |
| C(9)  | 491(4)   | 758(3)   | 7217(2) | 40(1)  |
| C(10) | 1412(4)  | -1322(3) | 7424(2) | 43(1)  |
| C(11) | 1869(4)  | 3290(3)  | 6222(1) | 36(1)  |
| C(12) | 1227(4)  | 4410(3)  | 6251(2) | 39(1)  |
| C(13) | 1746(4)  | 5195(3)  | 6626(2) | 38(1)  |
| C(14) | 2893(4)  | 4840(3)  | 6960(2) | 37(1)  |
| C(15) | 3504(4)  | 3719(3)  | 6904(1) | 34(1)  |
| C(16) | 4751(4)  | -2436(3) | 6599(2) | 46(1)  |
| C(17) | 7330(4)  | -1954(3) | 6788(2) | 41(1)  |
| C(18) | 6267(5)  | -1759(3) | 5908(2) | 47(1)  |
| C(19) | 6646(5)  | -3756(3) | 6293(2) | 51(1)  |
| C(20) | 85(7)    | 6953(5)  | 5243(2) | 89(2)  |
| C(21) | 3759(14) | -5050(8) | 5189(4) | 157(5) |
| N(1)  | 4417(3)  | 1167(2)  | 5788(1) | 30(1)  |
| N(2)  | 2296(3)  | 204(2)   | 6224(1) | 29(1)  |
| N(3)  | 3003(3)  | 2931(2)  | 6539(1) | 31(1)  |
| N(4)  | 6244(3)  | -2473(2) | 6398(1) | 35(1)  |
| O(1)  | 5854(3)  | 1894(2)  | 5163(1) | 42(1)  |
| O(2)  | 636(3)   | -1293(2) | 6368(1) | 44(1)  |
| O(3)  | -230(4)  | 6934(3)  | 5728(1) | 73(1)  |
| O(4)  | 3718(8)  | -3890(5) | 5426(2) | 117(3) |
| S(1)  | 6322(1)  | 1468(1)  | 6676(1) | 33(1)  |
| S(2)  | 3519(1)  | 415(1)   | 7259(1) | 32(1)  |
| Fe(1) | 3950(1)  | 1145(1)  | 6490(1) | 29(1)  |

**Table S-16.** Bond lengths [Å] and angles [deg] for (NMe<sub>4</sub>)[Fe<sup>III</sup>(Et-N<sub>2</sub>)S<sub>2</sub><sup>Me2</sup>](Py)]•2MeOH (3).

---

|              |          |
|--------------|----------|
| C(1)-C(3)    | 1.521(5) |
| C(1)-H(1A)   | 0.9800   |
| C(1)-H(1B)   | 0.9800   |
| C(1)-H(1C)   | 0.9800   |
| C(2)-C(3)    | 1.522(5) |
| C(2)-H(2A)   | 0.9800   |
| C(2)-H(2B)   | 0.9800   |
| C(2)-H(2C)   | 0.9800   |
| C(3)-C(4)    | 1.523(5) |
| C(3)-S(1)    | 1.854(4) |
| C(4)-O(1)    | 1.250(4) |
| C(4)-N(1)    | 1.342(4) |
| C(5)-N(1)    | 1.466(4) |
| C(5)-C(6)    | 1.526(5) |
| C(5)-H(5A)   | 0.9900   |
| C(5)-H(5B)   | 0.9900   |
| C(6)-N(2)    | 1.462(4) |
| C(6)-H(6A)   | 0.9900   |
| C(6)-H(6B)   | 0.9900   |
| C(7)-O(2)    | 1.251(4) |
| C(7)-N(2)    | 1.332(4) |
| C(7)-C(8)    | 1.529(5) |
| C(8)-C(9)    | 1.525(5) |
| C(8)-C(10)   | 1.532(5) |
| C(8)-S(2)    | 1.851(3) |
| C(9)-H(9A)   | 0.9800   |
| C(9)-H(9B)   | 0.9800   |
| C(9)-H(9C)   | 0.9800   |
| C(10)-H(10A) | 0.9800   |
| C(10)-H(10B) | 0.9800   |
| C(10)-H(10C) | 0.9800   |
| C(11)-N(3)   | 1.338(4) |
| C(11)-C(12)  | 1.377(5) |
| C(11)-H(11)  | 0.9500   |
| C(12)-C(13)  | 1.370(5) |
| C(12)-H(12)  | 0.9500   |
| C(13)-C(14)  | 1.372(5) |
| C(13)-H(13)  | 0.9500   |
| C(14)-C(15)  | 1.374(5) |
| C(14)-H(14)  | 0.9500   |
| C(15)-N(3)   | 1.348(4) |
| C(15)-H(15)  | 0.9500   |
| C(16)-N(4)   | 1.480(5) |

|                  |            |
|------------------|------------|
| C(16)-H(16A)     | 0.9800     |
| C(16)-H(16B)     | 0.9800     |
| C(16)-H(16C)     | 0.9800     |
| C(17)-N(4)       | 1.486(4)   |
| C(17)-H(17A)     | 0.9800     |
| C(17)-H(17B)     | 0.9800     |
| C(17)-H(17C)     | 0.9800     |
| C(18)-N(4)       | 1.501(4)   |
| C(18)-H(18A)     | 0.9800     |
| C(18)-H(18B)     | 0.9800     |
| C(18)-H(18C)     | 0.9800     |
| C(19)-N(4)       | 1.499(4)   |
| C(19)-H(19A)     | 0.9800     |
| C(19)-H(19B)     | 0.9800     |
| C(19)-H(19C)     | 0.9800     |
| C(20)-O(3)       | 1.309(6)   |
| C(20)-H(20A)     | 0.9800     |
| C(20)-H(20B)     | 0.9800     |
| C(20)-H(20C)     | 0.9800     |
| C(21)-O(4)       | 1.429(10)  |
| C(21)-H(21A)     | 0.9800     |
| C(21)-H(21B)     | 0.9800     |
| C(21)-H(21C)     | 0.9800     |
| N(1)-Fe(1)       | 1.898(3)   |
| N(2)-Fe(1)       | 1.920(3)   |
| N(3)-Fe(1)       | 2.167(3)   |
| O(3)-H(3)        | 0.8400     |
| O(4)-H(4)        | 0.8400     |
| S(1)-Fe(1)       | 2.2037(10) |
| S(2)-Fe(1)       | 2.2162(11) |
| C(3)-C(1)-H(1A)  | 109.5      |
| C(3)-C(1)-H(1B)  | 109.5      |
| H(1A)-C(1)-H(1B) | 109.5      |
| C(3)-C(1)-H(1C)  | 109.5      |
| H(1A)-C(1)-H(1C) | 109.5      |
| H(1B)-C(1)-H(1C) | 109.5      |
| C(3)-C(2)-H(2A)  | 109.5      |
| C(3)-C(2)-H(2B)  | 109.5      |
| H(2A)-C(2)-H(2B) | 109.5      |
| C(3)-C(2)-H(2C)  | 109.5      |
| H(2A)-C(2)-H(2C) | 109.5      |
| H(2B)-C(2)-H(2C) | 109.5      |
| C(1)-C(3)-C(2)   | 110.5(3)   |
| C(1)-C(3)-C(4)   | 109.5(3)   |
| C(2)-C(3)-C(4)   | 108.1(3)   |
| C(1)-C(3)-S(1)   | 109.8(2)   |
| C(2)-C(3)-S(1)   | 108.7(3)   |
| C(4)-C(3)-S(1)   | 110.1(2)   |

|                     |          |
|---------------------|----------|
| O(1)-C(4)-N(1)      | 124.2(3) |
| O(1)-C(4)-C(3)      | 119.1(3) |
| N(1)-C(4)-C(3)      | 116.7(3) |
| N(1)-C(5)-C(6)      | 106.8(3) |
| N(1)-C(5)-H(5A)     | 110.4    |
| C(6)-C(5)-H(5A)     | 110.4    |
| N(1)-C(5)-H(5B)     | 110.4    |
| C(6)-C(5)-H(5B)     | 110.4    |
| H(5A)-C(5)-H(5B)    | 108.6    |
| N(2)-C(6)-C(5)      | 108.5(3) |
| N(2)-C(6)-H(6A)     | 110.0    |
| C(5)-C(6)-H(6A)     | 110.0    |
| N(2)-C(6)-H(6B)     | 110.0    |
| C(5)-C(6)-H(6B)     | 110.0    |
| H(6A)-C(6)-H(6B)    | 108.4    |
| O(2)-C(7)-N(2)      | 124.6(3) |
| O(2)-C(7)-C(8)      | 119.1(3) |
| N(2)-C(7)-C(8)      | 116.3(3) |
| C(9)-C(8)-C(7)      | 108.5(3) |
| C(9)-C(8)-C(10)     | 109.9(3) |
| C(7)-C(8)-C(10)     | 111.1(3) |
| C(9)-C(8)-S(2)      | 109.7(2) |
| C(7)-C(8)-S(2)      | 108.3(2) |
| C(10)-C(8)-S(2)     | 109.3(2) |
| C(8)-C(9)-H(9A)     | 109.5    |
| C(8)-C(9)-H(9B)     | 109.5    |
| H(9A)-C(9)-H(9B)    | 109.5    |
| C(8)-C(9)-H(9C)     | 109.5    |
| H(9A)-C(9)-H(9C)    | 109.5    |
| H(9B)-C(9)-H(9C)    | 109.5    |
| C(8)-C(10)-H(10A)   | 109.5    |
| C(8)-C(10)-H(10B)   | 109.5    |
| H(10A)-C(10)-H(10B) | 109.5    |
| C(8)-C(10)-H(10C)   | 109.5    |
| H(10A)-C(10)-H(10C) | 109.5    |
| H(10B)-C(10)-H(10C) | 109.5    |
| N(3)-C(11)-C(12)    | 123.1(3) |
| N(3)-C(11)-H(11)    | 118.5    |
| C(12)-C(11)-H(11)   | 118.5    |
| C(13)-C(12)-C(11)   | 119.0(4) |
| C(13)-C(12)-H(12)   | 120.5    |
| C(11)-C(12)-H(12)   | 120.5    |
| C(12)-C(13)-C(14)   | 118.9(4) |
| C(12)-C(13)-H(13)   | 120.6    |
| C(14)-C(13)-H(13)   | 120.6    |
| C(13)-C(14)-C(15)   | 119.1(4) |
| C(13)-C(14)-H(14)   | 120.4    |
| C(15)-C(14)-H(14)   | 120.4    |

|                     |          |
|---------------------|----------|
| N(3)-C(15)-C(14)    | 122.8(3) |
| N(3)-C(15)-H(15)    | 118.6    |
| C(14)-C(15)-H(15)   | 118.6    |
| N(4)-C(16)-H(16A)   | 109.5    |
| N(4)-C(16)-H(16B)   | 109.5    |
| H(16A)-C(16)-H(16B) | 109.5    |
| N(4)-C(16)-H(16C)   | 109.5    |
| H(16A)-C(16)-H(16C) | 109.5    |
| H(16B)-C(16)-H(16C) | 109.5    |
| N(4)-C(17)-H(17A)   | 109.5    |
| N(4)-C(17)-H(17B)   | 109.5    |
| H(17A)-C(17)-H(17B) | 109.5    |
| N(4)-C(17)-H(17C)   | 109.5    |
| H(17A)-C(17)-H(17C) | 109.5    |
| H(17B)-C(17)-H(17C) | 109.5    |
| N(4)-C(18)-H(18A)   | 109.5    |
| N(4)-C(18)-H(18B)   | 109.5    |
| H(18A)-C(18)-H(18B) | 109.5    |
| N(4)-C(18)-H(18C)   | 109.5    |
| H(18A)-C(18)-H(18C) | 109.5    |
| H(18B)-C(18)-H(18C) | 109.5    |
| N(4)-C(19)-H(19A)   | 109.5    |
| N(4)-C(19)-H(19B)   | 109.5    |
| H(19A)-C(19)-H(19B) | 109.5    |
| N(4)-C(19)-H(19C)   | 109.5    |
| H(19A)-C(19)-H(19C) | 109.5    |
| H(19B)-C(19)-H(19C) | 109.5    |
| O(3)-C(20)-H(20A)   | 109.5    |
| O(3)-C(20)-H(20B)   | 109.5    |
| H(20A)-C(20)-H(20B) | 109.5    |
| O(3)-C(20)-H(20C)   | 109.5    |
| H(20A)-C(20)-H(20C) | 109.5    |
| H(20B)-C(20)-H(20C) | 109.5    |
| O(4)-C(21)-H(21A)   | 109.5    |
| O(4)-C(21)-H(21B)   | 109.5    |
| H(21A)-C(21)-H(21B) | 109.5    |
| O(4)-C(21)-H(21C)   | 109.5    |
| H(21A)-C(21)-H(21C) | 109.5    |
| H(21B)-C(21)-H(21C) | 109.5    |
| C(4)-N(1)-C(5)      | 119.3(3) |
| C(4)-N(1)-Fe(1)     | 123.5(2) |
| C(5)-N(1)-Fe(1)     | 116.1(2) |
| C(7)-N(2)-C(6)      | 118.2(3) |
| C(7)-N(2)-Fe(1)     | 122.4(2) |
| C(6)-N(2)-Fe(1)     | 116.2(2) |
| C(11)-N(3)-C(15)    | 117.0(3) |
| C(11)-N(3)-Fe(1)    | 121.8(2) |
| C(15)-N(3)-Fe(1)    | 121.1(2) |

|                  |            |
|------------------|------------|
| C(16)-N(4)-C(17) | 109.3(3)   |
| C(16)-N(4)-C(19) | 109.2(3)   |
| C(17)-N(4)-C(19) | 109.5(3)   |
| C(16)-N(4)-C(18) | 110.2(3)   |
| C(17)-N(4)-C(18) | 109.4(3)   |
| C(19)-N(4)-C(18) | 109.3(3)   |
| C(20)-O(3)-H(3)  | 109.5      |
| C(21)-O(4)-H(4)  | 109.5      |
| C(3)-S(1)-Fe(1)  | 99.40(12)  |
| C(8)-S(2)-Fe(1)  | 98.22(11)  |
| N(1)-Fe(1)-N(2)  | 82.91(12)  |
| N(1)-Fe(1)-N(3)  | 99.06(11)  |
| N(2)-Fe(1)-N(3)  | 102.43(11) |
| N(1)-Fe(1)-S(1)  | 86.44(9)   |
| N(2)-Fe(1)-S(1)  | 153.77(9)  |
| N(3)-Fe(1)-S(1)  | 102.87(8)  |
| N(1)-Fe(1)-S(2)  | 159.22(9)  |
| N(2)-Fe(1)-S(2)  | 87.06(9)   |
| N(3)-Fe(1)-S(2)  | 100.86(8)  |
| S(1)-Fe(1)-S(2)  | 94.83(4)   |

---

**Table S-17.** Anisotropic displacement parameters ( $\text{\AA}^2 \times 10^3$ ) for  $(\text{NMe}_4)[\text{Fe}^{\text{III}}(\text{Et-N}_2)\text{S}_2^{\text{Me}_2}(\text{Py})] \cdot 2\text{MeOH}$  (**3**). The anisotropic displacement factor exponent takes the form:  $-2 \pi^2 [ h^2 a^{*2} U_{11} + \dots + 2 h k a^* b^* U_{12} ]$

|       | U11     | U22   | U33    | U23    | U13    | U12    |
|-------|---------|-------|--------|--------|--------|--------|
| C(1)  | 38(2)   | 51(3) | 40(3)  | 7(2)   | 8(2)   | -1(2)  |
| C(2)  | 61(3)   | 36(2) | 37(3)  | 1(2)   | -6(2)  | -13(2) |
| C(3)  | 33(2)   | 29(2) | 29(2)  | -1(2)  | 3(2)   | -7(2)  |
| C(4)  | 40(2)   | 25(2) | 27(2)  | -1(2)  | 7(2)   | 2(2)   |
| C(5)  | 36(2)   | 33(2) | 25(2)  | 0(2)   | 2(2)   | -2(2)  |
| C(6)  | 35(2)   | 38(2) | 33(2)  | -5(2)  | 0(2)   | -6(2)  |
| C(7)  | 33(2)   | 31(2) | 35(2)  | -3(2)  | 0(2)   | 2(2)   |
| C(8)  | 36(2)   | 31(2) | 24(2)  | 1(2)   | 3(2)   | -5(2)  |
| C(9)  | 41(2)   | 44(2) | 35(2)  | -1(2)  | 6(2)   | 2(2)   |
| C(10) | 47(2)   | 41(2) | 41(3)  | 9(2)   | 0(2)   | -6(2)  |
| C(11) | 41(2)   | 35(2) | 30(2)  | -1(2)  | -2(2)  | -2(2)  |
| C(12) | 37(2)   | 40(2) | 40(3)  | 3(2)   | 0(2)   | 0(2)   |
| C(13) | 42(2)   | 29(2) | 43(3)  | 3(2)   | 7(2)   | 1(2)   |
| C(14) | 45(2)   | 29(2) | 38(3)  | -3(2)  | 5(2)   | -5(2)  |
| C(15) | 34(2)   | 37(2) | 32(2)  | 1(2)   | 3(2)   | -5(2)  |
| C(16) | 45(2)   | 33(2) | 59(3)  | 2(2)   | 4(2)   | -3(2)  |
| C(17) | 44(2)   | 38(2) | 41(3)  | 2(2)   | -3(2)  | -4(2)  |
| C(18) | 68(3)   | 38(2) | 35(3)  | 4(2)   | 5(2)   | 7(2)   |
| C(19) | 78(3)   | 33(2) | 41(3)  | 0(2)   | 2(2)   | 13(2)  |
| C(20) | 122(5)  | 80(4) | 67(4)  | -9(3)  | 12(4)  | -10(4) |
| C(21) | 271(14) | 79(6) | 112(9) | 21(6)  | -58(8) | -22(8) |
| N(1)  | 34(2)   | 32(2) | 25(2)  | 0(1)   | 0(1)   | -2(1)  |
| N(2)  | 33(2)   | 28(2) | 26(2)  | 3(1)   | 1(1)   | -2(1)  |
| N(3)  | 35(2)   | 29(2) | 29(2)  | 1(1)   | 0(1)   | -3(1)  |
| N(4)  | 47(2)   | 26(2) | 32(2)  | 0(1)   | 1(2)   | 2(1)   |
| O(1)  | 48(2)   | 47(2) | 34(2)  | 1(1)   | 4(1)   | -10(1) |
| O(2)  | 48(2)   | 44(2) | 40(2)  | -8(1)  | 4(1)   | -18(1) |
| O(3)  | 121(3)  | 50(2) | 48(2)  | -12(2) | 11(2)  | -20(2) |
| O(4)  | 211(8)  | 72(4) | 62(4)  | 13(3)  | -35(4) | -57(4) |
| S(1)  | 35(1)   | 35(1) | 30(1)  | 1(1)   | -1(1)  | -1(1)  |
| S(2)  | 36(1)   | 32(1) | 27(1)  | 0(1)   | 0(1)   | -1(1)  |
| Fe(1) | 34(1)   | 26(1) | 27(1)  | -1(1)  | 0(1)   | -1(1)  |



**Table S-18.** Hydrogen coordinates (  $\times 10^4$  ) and isotropic displacement parameters ( $\text{Å}^2 \times 10^3$ ) for  $(\text{NMe}_4)[\text{Fe}^{\text{III}}(\text{Et-N}_2)\text{S}_2^{\text{Me}_2}](\text{Py})] \cdot 2\text{MeOH}$  (**3**).

|        | x    | y     | z    | U(eq) |
|--------|------|-------|------|-------|
| H(1A)  | 8116 | 435   | 5891 | 65    |
| H(1B)  | 9071 | 1480  | 6175 | 65    |
| H(1C)  | 8605 | 1589  | 5574 | 65    |
| H(2A)  | 6181 | 3708  | 6117 | 67    |
| H(2B)  | 7401 | 3573  | 5701 | 67    |
| H(2C)  | 7881 | 3518  | 6303 | 67    |
| H(5A)  | 3625 | 471   | 5102 | 38    |
| H(5B)  | 2635 | 1557  | 5303 | 38    |
| H(6A)  | 1217 | -18   | 5526 | 42    |
| H(6B)  | 2612 | -899  | 5620 | 42    |
| H(9A)  | 702  | 1506  | 7036 | 60    |
| H(9B)  | 525  | 912   | 7589 | 60    |
| H(9C)  | -495 | 466   | 7102 | 60    |
| H(10A) | 2139 | -1935 | 7341 | 65    |
| H(10B) | 412  | -1636 | 7346 | 65    |
| H(10C) | 1537 | -1120 | 7791 | 65    |
| H(11)  | 1490 | 2746  | 5965 | 43    |
| H(12)  | 434  | 4635  | 6014 | 47    |
| H(13)  | 1320 | 5972  | 6654 | 45    |
| H(14)  | 3260 | 5363  | 7228 | 45    |
| H(15)  | 4314 | 3488  | 7131 | 41    |
| H(16A) | 4494 | -1600 | 6677 | 69    |
| H(16B) | 4742 | -2921 | 6913 | 69    |
| H(16C) | 4028 | -2760 | 6339 | 69    |
| H(17A) | 7060 | -1119 | 6860 | 62    |
| H(17B) | 8319 | -1975 | 6656 | 62    |
| H(17C) | 7327 | -2428 | 7106 | 62    |
| H(18A) | 6053 | -912  | 5979 | 70    |
| H(18B) | 5517 | -2076 | 5656 | 70    |
| H(18C) | 7245 | -1824 | 5770 | 70    |
| H(19A) | 6630 | -4225 | 6612 | 76    |
| H(19B) | 7639 | -3786 | 6164 | 76    |
| H(19C) | 5933 | -4096 | 6034 | 76    |
| H(20A) | -220 | 7727  | 5090 | 134   |
| H(20B) | -443 | 6298  | 5058 | 134   |
| H(20C) | 1152 | 6847  | 5219 | 134   |
| H(21A) | 4030 | -5659 | 5451 | 235   |
| H(21B) | 4492 | -5048 | 4927 | 235   |
| H(21C) | 2783 | -5240 | 5026 | 235   |
| H(3)   | 239  | 7484  | 5888 | 109   |
| H(4)   | 3082 | -3459 | 5265 | 175   |

**Table S-19.** Crystal data and structure refinement for  
 $(\text{NMe}_4)_2[\text{Fe}(\text{III})(\text{N}_2\text{S-tame})\text{S}_2^{\text{Me}_2}]\cdot\text{MeCN}$  (**15**).

|                                                               |                                                                                                      |
|---------------------------------------------------------------|------------------------------------------------------------------------------------------------------|
| Empirical formula                                             | C23 H48 Fe N5 O2 S3                                                                                  |
| Formula weight                                                | 578.69                                                                                               |
| Temperature                                                   | 130(2) K                                                                                             |
| Wavelength                                                    | 0.71073 Å                                                                                            |
| Crystal description/color                                     | prism / orange                                                                                       |
| Crystal system, space group                                   | Orthorhombic, P b c a                                                                                |
| Unit cell dimensions                                          | a = 18.6780(3)Å alpha = 90 deg.<br>b = 15.0370(3)Å beta = 90 deg.<br>c = 21.9230(5)Å gamma = 90 deg. |
| Volume                                                        | 6157.3(2) Å <sup>3</sup>                                                                             |
| Z, Calculated density                                         | 8, 1.249 Mg/m <sup>3</sup>                                                                           |
| Absorption coefficient                                        | 0.720 mm <sup>-1</sup>                                                                               |
| F(000)                                                        | 2488                                                                                                 |
| Crystal size                                                  | 0.48 x 0.12 x 0.12 mm                                                                                |
| Reflections for indexing                                      | 1025                                                                                                 |
| Theta range for data collection                               | 3.06 to 28.34 deg.                                                                                   |
| Index ranges                                                  | -24<=h<=24, -20<=k<=20, -28<=l<=28                                                                   |
| Reflections collected / unique                                | 14120 / 7568 [R(int) = 0.0457]                                                                       |
| Completeness to theta                                         | = 25.00 99.5%                                                                                        |
| Absorption correction                                         | Semi-empirical from equivalents                                                                      |
| Max. and min. transmission                                    | 0.9185 and 0.7237                                                                                    |
| Refinement method                                             | Full-matrix least-squares on F <sup>2</sup>                                                          |
| Data / restraints / parameters                                | 7568 / 0 / 321                                                                                       |
| Goodness-of-fit on F <sup>2</sup>                             | S = 0.940                                                                                            |
| S = root(sum(w*D*D)/(n-p)), where D = (Fo*Fo - Fc*Fc)         |                                                                                                      |
| Final R indices [I>2sigma(I)]                                 | *R1 = 0.0426, wR2 = 0.0964                                                                           |
| R indices (all data)                                          | R1 = 0.0835, *wR2 = 0.1095                                                                           |
| *Report these R factors. R1 = sum  Fo - Fc  /sum Fo ,         |                                                                                                      |
| wR2= root(sum(w*D*D)/sum(w*Fo*Fo)), where D = (Fo*Fo - Fc*Fc) |                                                                                                      |
| Weighting scheme                                              | calcw=1/[\s^2^(Fo^2^)+(0.0591P)^2^+0.0000P]                                                          |
| where P=(Fo^2^+2Fc^2^)/3                                      |                                                                                                      |
| Largest diff. peak and hole                                   | 0.427 and -0.437 e.Å <sup>-3</sup>                                                                   |

**Table S-20.** Atomic coordinates ( $\times 10^4$ ) and equivalent isotropic displacement parameters ( $\text{Å}^2 \times 10^3$ ) for  $(\text{NMe}_4)_2[\text{Fe}(\text{III})(\text{N}_2\text{S-tame})\text{S}_2^{\text{Me}_2}]\cdot\text{MeCN}$  (**15**).  $U(\text{eq})$  is defined as one third of the trace of the orthogonalized  $U_{ij}$  tensor.

|       | x       | y       | z       | $U(\text{eq})$ |
|-------|---------|---------|---------|----------------|
| Fe(1) | 1793(1) | 117(1)  | 3162(1) | 26(1)          |
| S(1)  | 1979(1) | -412(1) | 2231(1) | 29(1)          |
| S(2)  | 2702(1) | -730(1) | 3461(1) | 32(1)          |
| S(3)  | 715(1)  | -344(1) | 3673(1) | 36(1)          |
| O(5)  | 645(1)  | 1549(1) | 1895(1) | 34(1)          |
| O(8)  | 2564(1) | 990(1)  | 4807(1) | 37(1)          |
| N(1)  | 1233(1) | 1035(1) | 2746(1) | 30(1)          |
| N(2)  | 2056(1) | 868(1)  | 3855(1) | 28(1)          |
| N(3)  | 3467(1) | 1831(2) | 1102(1) | 44(1)          |
| N(4)  | 1325(1) | 3632(1) | 1225(1) | 30(1)          |
| N(5)  | 3670(1) | 1983(1) | 2860(1) | 29(1)          |
| C(1)  | 1331(1) | 218(1)  | 1785(1) | 29(1)          |
| C(2)  | 1055(1) | 1004(1) | 2156(1) | 28(1)          |
| C(3)  | 813(1)  | 1680(2) | 3092(1) | 40(1)          |
| C(4)  | 868(1)  | 1593(1) | 3773(1) | 30(1)          |
| C(5)  | 1642(1) | 1676(1) | 3984(1) | 33(1)          |
| C(6)  | 2466(1) | 583(1)  | 4316(1) | 29(1)          |
| C(7)  | 2822(1) | -331(2) | 4242(1) | 31(1)          |
| C(8)  | 678(1)  | -367(2) | 1636(1) | 40(1)          |
| C(9)  | 1680(1) | 531(2)  | 1193(1) | 38(1)          |
| C(10) | 514(1)  | 739(2)  | 4023(1) | 45(1)          |
| C(11) | 463(1)  | 2397(2) | 4040(1) | 38(1)          |
| C(12) | 2442(1) | -963(2) | 4683(1) | 41(1)          |
| C(13) | 3616(1) | -260(2) | 4400(1) | 41(1)          |
| C(14) | 3620(1) | 2185(2) | 664(1)  | 39(1)          |
| C(15) | 3816(1) | 2647(2) | 102(1)  | 53(1)          |
| C(16) | 2011(1) | 3129(2) | 1171(1) | 36(1)          |
| C(17) | 1095(1) | 3672(2) | 1875(1) | 37(1)          |
| C(18) | 760(1)  | 3165(2) | 863(1)  | 36(1)          |
| C(19) | 1427(1) | 4559(2) | 986(1)  | 41(1)          |
| C(20) | 2926(1) | 2134(2) | 2632(1) | 35(1)          |
| C(21) | 3902(1) | 1058(1) | 2694(1) | 39(1)          |
| C(22) | 3689(1) | 2101(2) | 3532(1) | 41(1)          |
| C(23) | 4168(1) | 2641(1) | 2576(1) | 33(1)          |

**Table S-21.** Bond lengths [Å] and angles [deg] for  
(NMe<sub>4</sub>)<sub>2</sub>[Fe(III)(N<sub>2</sub>S-tame)S<sub>2</sub><sup>Me2</sup>]**•**MeCN (**15**).

---

|            |            |
|------------|------------|
| Fe(1)-N(1) | 1.9572(18) |
| Fe(1)-N(2) | 1.9573(18) |
| Fe(1)-S(1) | 2.2171(7)  |
| Fe(1)-S(2) | 2.2219(6)  |
| Fe(1)-S(3) | 2.4058(7)  |
| S(1)-C(1)  | 1.822(2)   |
| S(2)-C(7)  | 1.830(2)   |
| S(3)-C(10) | 1.839(2)   |
| O(5)-C(2)  | 1.259(3)   |
| O(8)-C(6)  | 1.252(3)   |
| N(1)-C(2)  | 1.337(3)   |
| N(1)-C(3)  | 1.460(3)   |
| N(2)-C(6)  | 1.337(3)   |
| N(2)-C(5)  | 1.468(3)   |
| N(3)-C(14) | 1.134(3)   |
| N(4)-C(17) | 1.489(3)   |
| N(4)-C(16) | 1.493(3)   |
| N(4)-C(18) | 1.496(3)   |
| N(4)-C(19) | 1.502(3)   |
| N(5)-C(22) | 1.485(3)   |
| N(5)-C(23) | 1.494(3)   |
| N(5)-C(20) | 1.494(3)   |
| N(5)-C(21) | 1.502(3)   |
| C(1)-C(2)  | 1.524(3)   |
| C(1)-C(9)  | 1.526(3)   |
| C(1)-C(8)  | 1.539(3)   |
| C(3)-C(4)  | 1.502(3)   |
| C(3)-H(3A) | 0.9900     |
| C(3)-H(3B) | 0.9900     |
| C(4)-C(5)  | 1.521(3)   |
| C(4)-C(11) | 1.542(3)   |
| C(4)-C(10) | 1.545(3)   |
| C(5)-H(5A) | 0.9900     |
| C(5)-H(5B) | 0.9900     |
| C(6)-C(7)  | 1.535(3)   |
| C(7)-C(13) | 1.527(3)   |
| C(7)-C(12) | 1.530(3)   |
| C(8)-H(8A) | 0.9800     |
| C(8)-H(8B) | 0.9800     |
| C(8)-H(8C) | 0.9800     |
| C(9)-H(9A) | 0.9800     |
| C(9)-H(9B) | 0.9800     |
| C(9)-H(9C) | 0.9800     |

|                 |           |
|-----------------|-----------|
| C(10)-H(10A)    | 0.9900    |
| C(10)-H(10B)    | 0.9900    |
| C(11)-H(11A)    | 0.9800    |
| C(11)-H(11B)    | 0.9800    |
| C(11)-H(11C)    | 0.9800    |
| C(12)-H(12A)    | 0.9800    |
| C(12)-H(12B)    | 0.9800    |
| C(12)-H(12C)    | 0.9800    |
| C(13)-H(13A)    | 0.9800    |
| C(13)-H(13B)    | 0.9800    |
| C(13)-H(13C)    | 0.9800    |
| C(14)-C(15)     | 1.460(4)  |
| C(15)-H(15A)    | 0.9800    |
| C(15)-H(15B)    | 0.9800    |
| C(15)-H(15C)    | 0.9800    |
| C(16)-H(16A)    | 0.9800    |
| C(16)-H(16B)    | 0.9800    |
| C(16)-H(16C)    | 0.9800    |
| C(17)-H(17A)    | 0.9800    |
| C(17)-H(17B)    | 0.9800    |
| C(17)-H(17C)    | 0.9800    |
| C(18)-H(18A)    | 0.9800    |
| C(18)-H(18B)    | 0.9800    |
| C(18)-H(18C)    | 0.9800    |
| C(19)-H(19A)    | 0.9800    |
| C(19)-H(19B)    | 0.9800    |
| C(19)-H(19C)    | 0.9800    |
| C(20)-H(20A)    | 0.9800    |
| C(20)-H(20B)    | 0.9800    |
| C(20)-H(20C)    | 0.9800    |
| C(21)-H(21A)    | 0.9800    |
| C(21)-H(21B)    | 0.9800    |
| C(21)-H(21C)    | 0.9800    |
| C(22)-H(22A)    | 0.9800    |
| C(22)-H(22B)    | 0.9800    |
| C(22)-H(22C)    | 0.9800    |
| C(23)-H(23A)    | 0.9800    |
| C(23)-H(23B)    | 0.9800    |
| C(23)-H(23C)    | 0.9800    |
| N(1)-Fe(1)-N(2) | 95.12(7)  |
| N(1)-Fe(1)-S(1) | 84.71(6)  |
| N(2)-Fe(1)-S(1) | 151.92(6) |
| N(1)-Fe(1)-S(2) | 161.81(6) |

**Table S-21** (cont). Bond lengths [Å] and angles [deg] for  
 $(\text{NMe}_4)_2[\text{Fe}^{\text{III}}(\text{tame-N}_2\text{S}_3)] \cdot \text{MeCN}$  (**15**).

|                  |            |
|------------------|------------|
| N(2)-Fe(1)-S(2)  | 84.78(6)   |
| S(1)-Fe(1)-S(2)  | 86.91(2)   |
| N(1)-Fe(1)-S(3)  | 88.48(6)   |
| N(2)-Fe(1)-S(3)  | 90.85(6)   |
| S(1)-Fe(1)-S(3)  | 117.19(2)  |
| S(2)-Fe(1)-S(3)  | 109.72(3)  |
| C(1)-S(1)-Fe(1)  | 101.75(7)  |
| C(7)-S(2)-Fe(1)  | 100.46(7)  |
| C(10)-S(3)-Fe(1) | 96.33(8)   |
| C(2)-N(1)-C(3)   | 113.10(18) |
| C(2)-N(1)-Fe(1)  | 124.01(14) |
| C(3)-N(1)-Fe(1)  | 120.86(15) |
| C(6)-N(2)-C(5)   | 114.92(19) |
| C(6)-N(2)-Fe(1)  | 123.13(15) |
| C(5)-N(2)-Fe(1)  | 119.59(14) |
| C(17)-N(4)-C(16) | 110.15(18) |
| C(17)-N(4)-C(18) | 108.90(18) |
| C(16)-N(4)-C(18) | 109.06(17) |
| C(17)-N(4)-C(19) | 109.41(18) |
| C(16)-N(4)-C(19) | 109.40(18) |
| C(18)-N(4)-C(19) | 109.91(19) |
| C(22)-N(5)-C(23) | 108.63(18) |
| C(22)-N(5)-C(20) | 109.71(18) |
| C(23)-N(5)-C(20) | 109.80(17) |
| C(22)-N(5)-C(21) | 110.07(18) |
| C(23)-N(5)-C(21) | 109.48(17) |
| C(20)-N(5)-C(21) | 109.13(17) |
| C(2)-C(1)-C(9)   | 111.02(18) |
| C(2)-C(1)-C(8)   | 106.74(18) |
| C(9)-C(1)-C(8)   | 109.6(2)   |
| C(2)-C(1)-S(1)   | 109.96(16) |
| C(9)-C(1)-S(1)   | 109.44(16) |
| C(8)-C(1)-S(1)   | 110.07(15) |
| O(5)-C(2)-N(1)   | 124.6(2)   |
| O(5)-C(2)-C(1)   | 117.9(2)   |
| N(1)-C(2)-C(1)   | 117.32(19) |
| N(1)-C(3)-C(4)   | 114.98(19) |
| N(1)-C(3)-H(3A)  | 108.5      |
| C(4)-C(3)-H(3A)  | 108.5      |
| N(1)-C(3)-H(3B)  | 108.5      |
| C(4)-C(3)-H(3B)  | 108.5      |
| H(3A)-C(3)-H(3B) | 107.5      |
| C(3)-C(4)-C(5)   | 111.1(2)   |
| C(3)-C(4)-C(11)  | 105.95(19) |

**Table S-21** (cont). Bond lengths [Å] and angles [deg] for  
 $(\text{NMe}_4)_2[\text{Fe}^{\text{III}}(\text{tame-N}_2\text{S}_3)] \cdot \text{MeCN}$  (**15**).

|                     |            |
|---------------------|------------|
| C(5)-C(4)-C(11)     | 106.72(18) |
| C(3)-C(4)-C(10)     | 113.2(2)   |
| C(5)-C(4)-C(10)     | 111.6(2)   |
| C(11)-C(4)-C(10)    | 107.84(19) |
| N(2)-C(5)-C(4)      | 112.03(18) |
| N(2)-C(5)-H(5A)     | 109.2      |
| C(4)-C(5)-H(5A)     | 109.2      |
| N(2)-C(5)-H(5B)     | 109.2      |
| C(4)-C(5)-H(5B)     | 109.2      |
| H(5A)-C(5)-H(5B)    | 107.9      |
| O(8)-C(6)-N(2)      | 125.3(2)   |
| O(8)-C(6)-C(7)      | 117.7(2)   |
| N(2)-C(6)-C(7)      | 117.0(2)   |
| C(13)-C(7)-C(12)    | 110.5(2)   |
| C(13)-C(7)-C(6)     | 109.55(19) |
| C(12)-C(7)-C(6)     | 106.77(19) |
| C(13)-C(7)-S(2)     | 110.74(17) |
| C(12)-C(7)-S(2)     | 109.32(16) |
| C(6)-C(7)-S(2)      | 109.84(16) |
| C(1)-C(8)-H(8A)     | 109.5      |
| C(1)-C(8)-H(8B)     | 109.5      |
| H(8A)-C(8)-H(8B)    | 109.5      |
| C(1)-C(8)-H(8C)     | 109.5      |
| H(8A)-C(8)-H(8C)    | 109.5      |
| H(8B)-C(8)-H(8C)    | 109.5      |
| C(1)-C(9)-H(9A)     | 109.5      |
| C(1)-C(9)-H(9B)     | 109.5      |
| H(9A)-C(9)-H(9B)    | 109.5      |
| C(1)-C(9)-H(9C)     | 109.5      |
| H(9A)-C(9)-H(9C)    | 109.5      |
| H(9B)-C(9)-H(9C)    | 109.5      |
| C(4)-C(10)-S(3)     | 120.04(17) |
| C(4)-C(10)-H(10A)   | 107.3      |
| S(3)-C(10)-H(10A)   | 107.3      |
| C(4)-C(10)-H(10B)   | 107.3      |
| S(3)-C(10)-H(10B)   | 107.3      |
| H(10A)-C(10)-H(10B) | 106.9      |
| C(4)-C(11)-H(11A)   | 109.5      |
| C(4)-C(11)-H(11B)   | 109.5      |
| H(11A)-C(11)-H(11B) | 109.5      |
| C(4)-C(11)-H(11C)   | 109.5      |
| H(11A)-C(11)-H(11C) | 109.5      |
| H(11B)-C(11)-H(11C) | 109.5      |
| C(7)-C(12)-H(12A)   | 109.5      |
| C(7)-C(12)-H(12B)   | 109.5      |

**Table S-21** (cont). Bond lengths [Å] and angles [deg] for  
 $(\text{NMe}_4)_2[\text{Fe}^{\text{III}}(\text{tame-N}_2\text{S}_3)] \cdot \text{MeCN}$  (**15**).

|                     |          |
|---------------------|----------|
| H(12A)-C(12)-H(12B) | 109.5    |
| C(7)-C(12)-H(12C)   | 109.5    |
| H(12A)-C(12)-H(12C) | 109.5    |
| H(12B)-C(12)-H(12C) | 109.5    |
| C(7)-C(13)-H(13A)   | 109.5    |
| C(7)-C(13)-H(13B)   | 109.5    |
| H(13A)-C(13)-H(13B) | 109.5    |
| C(7)-C(13)-H(13C)   | 109.5    |
| H(13A)-C(13)-H(13C) | 109.5    |
| H(13B)-C(13)-H(13C) | 109.5    |
| N(3)-C(14)-C(15)    | 179.6(3) |
| C(14)-C(15)-H(15A)  | 109.5    |
| C(14)-C(15)-H(15B)  | 109.5    |
| H(15A)-C(15)-H(15B) | 109.5    |
| C(14)-C(15)-H(15C)  | 109.5    |
| H(15A)-C(15)-H(15C) | 109.5    |
| H(15B)-C(15)-H(15C) | 109.5    |
| N(4)-C(16)-H(16A)   | 109.5    |
| N(4)-C(16)-H(16B)   | 109.5    |
| H(16A)-C(16)-H(16B) | 109.5    |
| N(4)-C(16)-H(16C)   | 109.5    |
| H(16A)-C(16)-H(16C) | 109.5    |
| H(16B)-C(16)-H(16C) | 109.5    |
| N(4)-C(17)-H(17A)   | 109.5    |
| N(4)-C(17)-H(17B)   | 109.5    |
| H(17A)-C(17)-H(17B) | 109.5    |
| N(4)-C(17)-H(17C)   | 109.5    |
| H(17A)-C(17)-H(17C) | 109.5    |
| H(17B)-C(17)-H(17C) | 109.5    |
| N(4)-C(18)-H(18A)   | 109.5    |
| N(4)-C(18)-H(18B)   | 109.5    |
| H(18A)-C(18)-H(18B) | 109.5    |
| N(4)-C(18)-H(18C)   | 109.5    |
| H(18A)-C(18)-H(18C) | 109.5    |
| H(18B)-C(18)-H(18C) | 109.5    |
| N(4)-C(19)-H(19A)   | 109.5    |
| N(4)-C(19)-H(19B)   | 109.5    |
| H(19A)-C(19)-H(19B) | 109.5    |
| N(4)-C(19)-H(19C)   | 109.5    |
| H(19A)-C(19)-H(19C) | 109.5    |
| H(19B)-C(19)-H(19C) | 109.5    |
| N(5)-C(20)-H(20A)   | 109.5    |
| N(5)-C(20)-H(20B)   | 109.5    |
| H(20A)-C(20)-H(20B) | 109.5    |
| N(5)-C(20)-H(20C)   | 109.5    |



**Table S-21** (cont). Bond lengths [Å] and angles [deg] for  
(NMe<sub>4</sub>)<sub>2</sub>[Fe<sup>III</sup>(tame-N<sub>2</sub>S<sub>3</sub>)]•MeCN (**15**).

|                     |       |
|---------------------|-------|
| H(20A)-C(20)-H(20C) | 109.5 |
| H(20B)-C(20)-H(20C) | 109.5 |
| N(5)-C(21)-H(21A)   | 109.5 |
| N(5)-C(21)-H(21B)   | 109.5 |
| H(21A)-C(21)-H(21B) | 109.5 |
| N(5)-C(21)-H(21C)   | 109.5 |
| H(21A)-C(21)-H(21C) | 109.5 |
| H(21B)-C(21)-H(21C) | 109.5 |
| N(5)-C(22)-H(22A)   | 109.5 |
| N(5)-C(22)-H(22B)   | 109.5 |
| H(22A)-C(22)-H(22B) | 109.5 |
| N(5)-C(22)-H(22C)   | 109.5 |
| H(22A)-C(22)-H(22C) | 109.5 |
| H(22B)-C(22)-H(22C) | 109.5 |
| N(5)-C(23)-H(23A)   | 109.5 |
| N(5)-C(23)-H(23B)   | 109.5 |
| H(23A)-C(23)-H(23B) | 109.5 |
| N(5)-C(23)-H(23C)   | 109.5 |
| H(23A)-C(23)-H(23C) | 109.5 |
| H(23B)-C(23)-H(23C) | 109.5 |

---

**Table S-22.** Anisotropic displacement parameters ( $\text{Å}^2 \times 10^3$ ) for  $(\text{NMe}_4)_2[\text{Fe}(\text{III})(\text{N}_2\text{S-tame})\text{S}_2^{\text{Me}_2}] \cdot \text{MeCN}$  (**15**). The anisotropic displacement factor exponent takes the form:  $-2 \pi^2 [h^2 a^{*2} U_{11} + \dots + 2 h k a^* b^* U_{12}]$

|       | U11   | U22   | U33   | U23    | U13    | U12   |
|-------|-------|-------|-------|--------|--------|-------|
| Fe(1) | 28(1) | 28(1) | 22(1) | -1(1)  | 1(1)   | -1(1) |
| S(1)  | 34(1) | 32(1) | 22(1) | -1(1)  | 0(1)   | 4(1)  |
| S(2)  | 38(1) | 32(1) | 24(1) | -2(1)  | -2(1)  | 6(1)  |
| S(3)  | 34(1) | 37(1) | 38(1) | -5(1)  | 7(1)   | -8(1) |
| O(5)  | 38(1) | 36(1) | 27(1) | 1(1)   | -4(1)  | 7(1)  |
| O(8)  | 42(1) | 42(1) | 26(1) | -6(1)  | -7(1)  | 4(1)  |
| N(1)  | 32(1) | 30(1) | 26(1) | -4(1)  | -1(1)  | 4(1)  |
| N(2)  | 28(1) | 30(1) | 27(1) | -2(1)  | 0(1)   | 0(1)  |
| N(3)  | 44(1) | 53(1) | 35(1) | 0(1)   | -1(1)  | -1(1) |
| N(4)  | 31(1) | 31(1) | 28(1) | 1(1)   | -1(1)  | 1(1)  |
| N(5)  | 31(1) | 29(1) | 28(1) | 1(1)   | 3(1)   | 0(1)  |
| C(1)  | 35(1) | 31(1) | 22(1) | -1(1)  | 1(1)   | 2(1)  |
| C(2)  | 25(1) | 31(1) | 28(1) | -1(1)  | 0(1)   | -2(1) |
| C(3)  | 47(2) | 45(1) | 28(2) | -8(1)  | -4(1)  | 15(1) |
| C(4)  | 28(1) | 35(1) | 27(1) | -6(1)  | 0(1)   | 3(1)  |
| C(5)  | 31(1) | 32(1) | 35(2) | -6(1)  | 0(1)   | 3(1)  |
| C(6)  | 29(1) | 34(1) | 24(1) | 0(1)   | 5(1)   | -3(1) |
| C(7)  | 38(1) | 33(1) | 23(1) | -2(1)  | -2(1)  | 4(1)  |
| C(8)  | 37(1) | 37(1) | 45(2) | -4(1)  | -12(1) | -1(1) |
| C(9)  | 49(2) | 42(1) | 24(1) | 2(1)   | 2(1)   | 7(1)  |
| C(10) | 40(1) | 46(1) | 51(2) | -12(1) | 15(1)  | -8(1) |
| C(11) | 33(1) | 44(1) | 36(2) | -10(1) | -1(1)  | 7(1)  |
| C(12) | 59(2) | 37(1) | 27(2) | 4(1)   | -2(1)  | 1(1)  |
| C(13) | 42(2) | 45(1) | 36(2) | -4(1)  | -8(1)  | 10(1) |
| C(14) | 32(1) | 46(1) | 40(2) | -3(1)  | -6(1)  | 4(1)  |
| C(15) | 41(2) | 70(2) | 47(2) | 18(1)  | -7(1)  | 1(1)  |
| C(16) | 33(1) | 36(1) | 38(2) | -4(1)  | -1(1)  | 5(1)  |
| C(17) | 42(1) | 43(1) | 26(1) | -2(1)  | 4(1)   | -3(1) |
| C(18) | 35(1) | 44(1) | 29(1) | -6(1)  | -4(1)  | 2(1)  |
| C(19) | 44(2) | 32(1) | 48(2) | 11(1)  | 8(1)   | 4(1)  |
| C(20) | 28(1) | 38(1) | 40(2) | 1(1)   | 1(1)   | 0(1)  |
| C(21) | 39(1) | 30(1) | 48(2) | -1(1)  | 3(1)   | 3(1)  |
| C(22) | 49(2) | 47(1) | 27(2) | 0(1)   | 4(1)   | -6(1) |
| C(23) | 32(1) | 31(1) | 35(2) | 2(1)   | 3(1)   | -1(1) |

**Table S-23.** Hydrogen coordinates (  $\times 10^4$ ) and isotropic displacement parameters ( $\text{Å}^2 \times 10^3$ ) for  $(\text{NMe}_4)_2[\text{Fe}(\text{III})(\text{N}_2\text{S-tame})\text{S}_2^{\text{Me}_2}]\cdot\text{MeCN}$  (**15**).

|        | x    | y     | z    | U(eq) |
|--------|------|-------|------|-------|
| H(3A)  | 304  | 1617  | 2974 | 48    |
| H(3B)  | 968  | 2285  | 2975 | 48    |
| H(5A)  | 1868 | 2187  | 3775 | 39    |
| H(5B)  | 1650 | 1794  | 4428 | 39    |
| H(8A)  | 353  | -42   | 1365 | 48    |
| H(8B)  | 427  | -519  | 2015 | 48    |
| H(8C)  | 838  | -914  | 1434 | 48    |
| H(9A)  | 1338 | 895   | 962  | 46    |
| H(9B)  | 1819 | 14    | 949  | 46    |
| H(9C)  | 2105 | 887   | 1288 | 46    |
| H(10A) | -11  | 826   | 4000 | 55    |
| H(10B) | 638  | 695   | 4460 | 55    |
| H(11A) | -17  | 2427  | 3860 | 45    |
| H(11B) | 725  | 2945  | 3946 | 45    |
| H(11C) | 422  | 2330  | 4483 | 45    |
| H(12A) | 2489 | -737  | 5100 | 49    |
| H(12B) | 2659 | -1554 | 4656 | 49    |
| H(12C) | 1934 | -1001 | 4575 | 49    |
| H(13A) | 3670 | 18    | 4802 | 49    |
| H(13B) | 3859 | 103   | 4093 | 49    |
| H(13C) | 3828 | -856  | 4408 | 49    |
| H(15A) | 3406 | 2993  | -45  | 63    |
| H(15B) | 3953 | 2210  | -209 | 63    |
| H(15C) | 4219 | 3047  | 182  | 63    |
| H(16A) | 2379 | 3419  | 1421 | 43    |
| H(16B) | 2165 | 3122  | 744  | 43    |
| H(16C) | 1941 | 2518  | 1314 | 43    |
| H(17A) | 649  | 4014  | 1907 | 44    |
| H(17B) | 1468 | 3962  | 2118 | 44    |
| H(17C) | 1015 | 3068  | 2028 | 44    |
| H(18A) | 315  | 3509  | 877  | 43    |
| H(18B) | 676  | 2572  | 1035 | 43    |
| H(18C) | 918  | 3106  | 439  | 43    |
| H(19A) | 965  | 4866  | 976  | 50    |
| H(19B) | 1627 | 4532  | 573  | 50    |
| H(19C) | 1757 | 4883  | 1254 | 50    |
| H(20A) | 2773 | 2739  | 2736 | 42    |
| H(20B) | 2601 | 1705  | 2822 | 42    |
| H(20C) | 2915 | 2058  | 2188 | 42    |

|        |      |      |      |    |
|--------|------|------|------|----|
| H(21A) | 3581 | 626  | 2887 | 47 |
| H(21B) | 4392 | 959  | 2837 | 47 |
| H(21C) | 3883 | 985  | 2250 | 47 |
| H(22A) | 3549 | 2711 | 3635 | 49 |
| H(22B) | 4175 | 1988 | 3681 | 49 |
| H(22C) | 3356 | 1682 | 3724 | 49 |
| H(23A) | 4023 | 3245 | 2693 | 39 |
| H(23B) | 4149 | 2583 | 2131 | 39 |
| H(23C) | 4657 | 2529 | 2718 | 39 |

---

**Table S-24.** Crystal data and structure refinement for  
 $[\text{Fe}(\text{II})(\text{tame-N}_3)\text{S}_2^{\text{Me}_2}(\text{CO})] \cdot \text{MeCN}$  (**16**).

|                                   |                                                                                                                                   |
|-----------------------------------|-----------------------------------------------------------------------------------------------------------------------------------|
| Compound                          | C16 H29 Fe N3 O S2 * CH3CN                                                                                                        |
| Empirical formula                 | C18 H32 Fe N4 O S2                                                                                                                |
| Formula weight                    | 440.45                                                                                                                            |
| Temperature                       | 161(2) K                                                                                                                          |
| Wavelength                        | 0.71070 Å                                                                                                                         |
| Crystal description/color         | plate/red                                                                                                                         |
| Crystal system, space group       | Triclinic, P -1 (No. 2)                                                                                                           |
| Unit cell dimensions              | a = 9.8660(2) Å alpha = 69.9776(14) deg.<br>b = 10.6971(2) Å beta = 75.4115(13) deg.<br>c = 12.0377(3) Å gamma = 68.5081(15) deg. |
| Volume                            | 1098.97(4) Å <sup>3</sup>                                                                                                         |
| Z, Calculated density             | 2, 1.331 Mg/m <sup>3</sup>                                                                                                        |
| Absorption coefficient            | 0.890 mm <sup>-1</sup>                                                                                                            |
| F(000)                            | 468                                                                                                                               |
| Crystal size                      | 0.24 x 0.23 x 0.09 mm                                                                                                             |
| Reflections for indexing          | 220                                                                                                                               |
| Theta range for data collection   | 2.13 to 30.51 deg.                                                                                                                |
| Index ranges                      | -13<=h<=14, -14<=k<=15, -17<=l<=17                                                                                                |
| Reflections collected / unique    | 33204 / 6233 [R(int) = 0.0335]                                                                                                    |
| Completeness to 2theta = 30.51    | 92.7%                                                                                                                             |
| Absorption correction             | Scalepack                                                                                                                         |
| Refinement method                 | Full-matrix least-squares on F <sup>2</sup>                                                                                       |
| Data / restraints / parameters    | 6233 / 0 / 235                                                                                                                    |
| Goodness-of-fit on F <sup>2</sup> | 1.090                                                                                                                             |
| Final R indices [I>2sigma(I)]     | *R1 = 0.0446, wR2 = 0.1136                                                                                                        |
| R indices (all data)              | R1 = 0.0668, *wR2 = 0.1256                                                                                                        |
| *Report these R factors           |                                                                                                                                   |
| Weighting scheme                  | calc w=1/[\s^2^(Fo^2^)+ (0.0703P)^2^+0.0000P]<br>where P=(Fo^2^+2Fc^2^)/3                                                         |
| Largest diff. peak and hole       | 0.690 and -0.857 e.Å <sup>-3</sup>                                                                                                |

**Table S-25.** Atomic coordinates ( $\times 10^4$ ) and equivalent isotropic displacement parameters ( $\text{\AA}^2 \times 10^3$ ) for  $[\text{Fe}(\text{II})(\text{tame-N}_3)\text{S}_2^{\text{Me}_2}(\text{CO})] \cdot \text{MeCN}$  (**16**).  $U(\text{eq})$  is defined as one third of the trace of the orthogonalized  $U_{ij}$  tensor.

|       | x        | y        | z        | $U(\text{eq})$ |
|-------|----------|----------|----------|----------------|
| C(1)  | 4227(3)  | -783(3)  | -2380(2) | 33(1)          |
| C(2)  | 4688(3)  | -2243(3) | -3759(2) | 34(1)          |
| C(3)  | 3484(2)  | -1352(2) | -3000(2) | 21(1)          |
| C(4)  | 2582(2)  | -2224(2) | -2078(2) | 19(1)          |
| C(5)  | 3404(3)  | -3643(2) | -1331(2) | 28(1)          |
| C(6)  | -2615(3) | 3729(2)  | -2258(2) | 29(1)          |
| C(7)  | -4067(2) | 3581(2)  | -3624(2) | 30(1)          |
| C(8)  | -2765(2) | 2783(2)  | -2911(2) | 20(1)          |
| C(9)  | -3005(2) | 1463(2)  | -2014(2) | 20(1)          |
| C(10) | -4497(3) | 1582(2)  | -1256(2) | 30(1)          |
| C(11) | 330(2)   | -2692(2) | -1164(2) | 21(1)          |
| C(12) | -2264(2) | -999(2)  | -1154(2) | 20(1)          |
| C(13) | -1069(2) | -2063(2) | -2889(2) | 21(1)          |
| C(14) | -1188(2) | -2284(2) | -1533(2) | 19(1)          |
| C(15) | -1804(3) | -3513(2) | -874(2)  | 28(1)          |
| C(16) | 515(2)   | 941(2)   | -1952(2) | 23(1)          |
| C(17) | 1769(3)  | 3835(3)  | -4176(2) | 39(1)          |
| C(18) | 1898(3)  | 4130(3)  | -3125(2) | 34(1)          |
| Fe(1) | 74(1)    | 169(1)   | -2799(1) | 15(1)          |
| O(1)  | 826(2)   | 1436(2)  | -1370(2) | 40(1)          |
| S(1)  | 2276(1)  | 98(1)    | -4002(1) | 19(1)          |
| S(2)  | -1096(1) | 2294(1)  | -3971(1) | 19(1)          |
| N(1)  | 1172(2)  | -1755(2) | -1944(2) | 17(1)          |
| N(2)  | -1951(2) | 299(2)   | -1912(1) | 17(1)          |
| N(3)  | -466(2)  | -909(2)  | -3672(1) | 16(1)          |
| N(4)  | 2009(3)  | 4368(3)  | -2311(3) | 57(1)          |

**Table S-26.** Bond lengths [Å] and angles [deg] for  
[Fe(II)(tame-N<sub>3</sub>)S<sub>2</sub><sup>Me2</sup>](CO)]•MeCN (**16**).

---

|              |          |
|--------------|----------|
| C(1)-C(3)    | 1.543(3) |
| C(1)-H(1A)   | 0.9436   |
| C(1)-H(1B)   | 0.9647   |
| C(1)-H(1C)   | 0.9489   |
| C(2)-C(3)    | 1.541(3) |
| C(2)-H(2A)   | 0.9296   |
| C(2)-H(2B)   | 0.9326   |
| C(2)-H(2C)   | 1.0046   |
| C(3)-C(4)    | 1.515(3) |
| C(3)-S(1)    | 1.835(2) |
| C(4)-N(1)    | 1.282(3) |
| C(4)-C(5)    | 1.518(3) |
| C(5)-H(5A)   | 0.8992   |
| C(5)-H(5B)   | 1.0058   |
| C(5)-H(5C)   | 0.9630   |
| C(6)-C(8)    | 1.542(3) |
| C(6)-H(6A)   | 0.9278   |
| C(6)-H(6B)   | 0.9793   |
| C(6)-H(6C)   | 0.9920   |
| C(7)-C(8)    | 1.538(3) |
| C(7)-H(7A)   | 0.9329   |
| C(7)-H(7B)   | 0.9483   |
| C(7)-H(7C)   | 0.9762   |
| C(8)-C(9)    | 1.513(3) |
| C(8)-S(2)    | 1.838(2) |
| C(9)-N(2)    | 1.287(3) |
| C(9)-C(10)   | 1.511(3) |
| C(10)-H(10A) | 0.9507   |
| C(10)-H(10B) | 0.9647   |
| C(10)-H(10C) | 0.9550   |
| C(11)-N(1)   | 1.466(3) |
| C(11)-C(14)  | 1.535(3) |
| C(11)-H(11A) | 0.9521   |
| C(11)-H(11B) | 0.9555   |
| C(12)-N(2)   | 1.470(3) |
| C(12)-C(14)  | 1.530(3) |
| C(12)-H(12A) | 0.9544   |
| C(12)-H(12B) | 0.9798   |
| C(13)-N(3)   | 1.491(3) |
| C(13)-C(14)  | 1.547(3) |

|                  |            |
|------------------|------------|
| C(13)-H(13A)     | 1.0015     |
| C(13)-H(13B)     | 0.9482     |
| C(14)-C(15)      | 1.535(3)   |
| C(15)-H(15A)     | 0.9547     |
| C(15)-H(15B)     | 0.9438     |
| C(15)-H(15C)     | 1.0123     |
| C(16)-O(1)       | 1.160(3)   |
| C(16)-Fe(1)      | 1.725(2)   |
| C(17)-C(18)      | 1.450(4)   |
| C(17)-H(17A)     | 1.0100     |
| C(17)-H(17B)     | 1.0100     |
| C(17)-H(17C)     | 1.0100     |
| C(18)-N(4)       | 1.133(4)   |
| Fe(1)-N(1)       | 1.9866(16) |
| Fe(1)-N(2)       | 1.9933(17) |
| Fe(1)-N(3)       | 2.0680(17) |
| Fe(1)-S(2)       | 2.2777(5)  |
| Fe(1)-S(1)       | 2.2790(6)  |
| N(3)-H(3N)       | 1.0101     |
| N(3)-H(3NB)      | 1.0100     |
| C(3)-C(1)-H(1A)  | 108.7      |
| C(3)-C(1)-H(1B)  | 108.2      |
| H(1A)-C(1)-H(1B) | 109.3      |
| C(3)-C(1)-H(1C)  | 108.9      |
| H(1A)-C(1)-H(1C) | 112.0      |
| H(1B)-C(1)-H(1C) | 109.6      |
| C(3)-C(2)-H(2A)  | 109.3      |
| C(3)-C(2)-H(2B)  | 109.4      |
| H(2A)-C(2)-H(2B) | 114.8      |
| C(3)-C(2)-H(2C)  | 106.0      |
| H(2A)-C(2)-H(2C) | 108.0      |
| H(2B)-C(2)-H(2C) | 109.0      |
| C(4)-C(3)-C(2)   | 110.33(19) |
| C(4)-C(3)-C(1)   | 110.29(18) |
| C(2)-C(3)-C(1)   | 108.69(19) |
| C(4)-C(3)-S(1)   | 109.14(14) |
| C(2)-C(3)-S(1)   | 108.12(15) |
| C(1)-C(3)-S(1)   | 110.25(15) |
| N(1)-C(4)-C(3)   | 120.14(18) |
| N(1)-C(4)-C(5)   | 122.1(2)   |
| C(3)-C(4)-C(5)   | 117.76(18) |
| C(4)-C(5)-H(5A)  | 110.0      |
| C(4)-C(5)-H(5B)  | 106.9      |
| H(5A)-C(5)-H(5B) | 111.4      |
| C(4)-C(5)-H(5C)  | 108.0      |
| H(5A)-C(5)-H(5C) | 114.1      |
| H(5B)-C(5)-H(5C) | 106.1      |
| C(8)-C(6)-H(6A)  | 111.9      |



|                     |            |
|---------------------|------------|
| C(8)-C(6)-H(6B)     | 110.7      |
| H(6A)-C(6)-H(6B)    | 110.8      |
| C(8)-C(6)-H(6C)     | 109.8      |
| H(6A)-C(6)-H(6C)    | 108.4      |
| H(6B)-C(6)-H(6C)    | 105.0      |
| C(8)-C(7)-H(7A)     | 107.8      |
| C(8)-C(7)-H(7B)     | 108.6      |
| H(7A)-C(7)-H(7B)    | 112.7      |
| C(8)-C(7)-H(7C)     | 107.0      |
| H(7A)-C(7)-H(7C)    | 110.5      |
| H(7B)-C(7)-H(7C)    | 110.2      |
| C(9)-C(8)-C(7)      | 110.25(19) |
| C(9)-C(8)-C(6)      | 109.86(17) |
| C(7)-C(8)-C(6)      | 109.32(18) |
| C(9)-C(8)-S(2)      | 108.62(13) |
| C(7)-C(8)-S(2)      | 107.88(15) |
| C(6)-C(8)-S(2)      | 110.89(16) |
| N(2)-C(9)-C(10)     | 122.6(2)   |
| N(2)-C(9)-C(8)      | 119.88(19) |
| C(10)-C(9)-C(8)     | 117.52(17) |
| C(9)-C(10)-H(10A)   | 108.3      |
| C(9)-C(10)-H(10B)   | 108.5      |
| H(10A)-C(10)-H(10B) | 109.4      |
| C(9)-C(10)-H(10C)   | 109.0      |
| H(10A)-C(10)-H(10C) | 111.4      |
| H(10B)-C(10)-H(10C) | 110.1      |
| N(1)-C(11)-C(14)    | 111.86(16) |
| N(1)-C(11)-H(11A)   | 112.3      |
| C(14)-C(11)-H(11A)  | 105.0      |
| N(1)-C(11)-H(11B)   | 111.1      |
| C(14)-C(11)-H(11B)  | 105.8      |
| H(11A)-C(11)-H(11B) | 110.4      |
| N(2)-C(12)-C(14)    | 112.08(16) |
| N(2)-C(12)-H(12A)   | 110.0      |
| C(14)-C(12)-H(12A)  | 108.3      |
| N(2)-C(12)-H(12B)   | 109.7      |
| C(14)-C(12)-H(12B)  | 108.4      |
| H(12A)-C(12)-H(12B) | 108.3      |
| N(3)-C(13)-C(14)    | 114.75(17) |
| N(3)-C(13)-H(13A)   | 110.0      |
| C(14)-C(13)-H(13A)  | 106.1      |
| N(3)-C(13)-H(13B)   | 112.1      |
| C(14)-C(13)-H(13B)  | 107.5      |
| H(13A)-C(13)-H(13B) | 105.8      |
| C(12)-C(14)-C(11)   | 111.68(18) |
| C(12)-C(14)-C(15)   | 107.55(18) |
| C(11)-C(14)-C(15)   | 107.18(17) |
| C(12)-C(14)-C(13)   | 111.26(16) |

|                     |            |
|---------------------|------------|
| C(11)-C(14)-C(13)   | 111.40(17) |
| C(15)-C(14)-C(13)   | 107.51(18) |
| C(14)-C(15)-H(15A)  | 111.6      |
| C(14)-C(15)-H(15B)  | 112.6      |
| H(15A)-C(15)-H(15B) | 111.2      |
| C(14)-C(15)-H(15C)  | 110.2      |
| H(15A)-C(15)-H(15C) | 105.5      |
| H(15B)-C(15)-H(15C) | 105.3      |
| O(1)-C(16)-Fe(1)    | 178.71(19) |
| C(18)-C(17)-H(17A)  | 109.5      |
| C(18)-C(17)-H(17B)  | 109.5      |
| H(17A)-C(17)-H(17B) | 109.5      |
| C(18)-C(17)-H(17C)  | 109.5      |
| H(17A)-C(17)-H(17C) | 109.5      |
| H(17B)-C(17)-H(17C) | 109.5      |
| N(4)-C(18)-C(17)    | 179.3(3)   |
| C(16)-Fe(1)-N(1)    | 93.59(8)   |
| C(16)-Fe(1)-N(2)    | 94.93(9)   |
| N(1)-Fe(1)-N(2)     | 100.47(7)  |
| C(16)-Fe(1)-N(3)    | 174.65(9)  |
| N(1)-Fe(1)-N(3)     | 82.06(7)   |
| N(2)-Fe(1)-N(3)     | 82.85(7)   |
| C(16)-Fe(1)-S(2)    | 91.53(7)   |
| N(1)-Fe(1)-S(2)     | 173.55(5)  |
| N(2)-Fe(1)-S(2)     | 82.97(5)   |
| N(3)-Fe(1)-S(2)     | 93.03(5)   |
| C(16)-Fe(1)-S(1)    | 89.74(8)   |
| N(1)-Fe(1)-S(1)     | 83.48(5)   |
| N(2)-Fe(1)-S(1)     | 173.65(5)  |
| N(3)-Fe(1)-S(1)     | 92.86(5)   |
| S(2)-Fe(1)-S(1)     | 92.63(2)   |
| C(3)-S(1)-Fe(1)     | 99.03(7)   |
| C(8)-S(2)-Fe(1)     | 98.96(7)   |
| C(4)-N(1)-C(11)     | 118.80(17) |
| C(4)-N(1)-Fe(1)     | 122.79(15) |
| C(11)-N(1)-Fe(1)    | 118.37(12) |
| C(9)-N(2)-C(12)     | 118.87(18) |
| C(9)-N(2)-Fe(1)     | 122.69(15) |
| C(12)-N(2)-Fe(1)    | 118.38(12) |
| C(13)-N(3)-Fe(1)    | 115.87(12) |
| C(13)-N(3)-H(3N)    | 108.3      |
| Fe(1)-N(3)-H(3N)    | 108.3      |
| C(13)-N(3)-H(3NB)   | 108.3      |
| Fe(1)-N(3)-H(3NB)   | 108.4      |
| H(3N)-N(3)-H(3NB)   | 107.4      |

**Table S-27.** Anisotropic displacement parameters ( $\text{\AA}^2 \times 10^3$ ) for  $[\text{Fe}(\text{II})(\text{tame-N}_3)\text{S}_2^{\text{Me}_2}(\text{CO})] \cdot \text{MeCN}$  (**16**). The anisotropic displacement factor exponent takes the form:  $-2 \pi^2 [ h^2 a^*^2 U_{11} + \dots + 2 h k a^* b^* U_{12} ]$

|       | U11   | U22   | U33   | U23    | U13    | U12    |
|-------|-------|-------|-------|--------|--------|--------|
| C(1)  | 27(1) | 32(1) | 43(1) | -6(1)  | -14(1) | 10(1)  |
| C(2)  | 23(1) | 29(1) | 37(1) | -8(1)  | 1(1)   | 1(1)   |
| C(3)  | 14(1) | 23(1) | 25(1) | -6(1)  | -5(1)  | -3(1)  |
| C(4)  | 19(1) | 21(1) | 20(1) | -7(1)  | -7(1)  | -4(1)  |
| C(5)  | 22(1) | 23(1) | 34(1) | -3(1)  | -9(1)  | -1(1)  |
| C(6)  | 30(1) | 23(1) | 33(1) | -15(1) | -2(1)  | -3(1)  |
| C(7)  | 21(1) | 29(1) | 32(1) | -5(1)  | -6(1)  | -1(1)  |
| C(8)  | 17(1) | 18(1) | 22(1) | -7(1)  | -1(1)  | -2(1)  |
| C(9)  | 18(1) | 22(1) | 20(1) | -8(1)  | -2(1)  | -5(1)  |
| C(10) | 23(1) | 28(1) | 32(1) | -8(1)  | 5(1)   | -5(1)  |
| C(11) | 21(1) | 19(1) | 19(1) | -1(1)  | -5(1)  | -4(1)  |
| C(12) | 19(1) | 22(1) | 17(1) | -2(1)  | -1(1)  | -8(1)  |
| C(13) | 26(1) | 19(1) | 21(1) | -4(1)  | -4(1)  | -11(1) |
| C(14) | 19(1) | 17(1) | 20(1) | -2(1)  | -3(1)  | -7(1)  |
| C(15) | 28(1) | 23(1) | 30(1) | 1(1)   | -3(1)  | -13(1) |
| C(16) | 21(1) | 22(1) | 24(1) | -8(1)  | -4(1)  | -3(1)  |
| C(17) | 48(2) | 36(1) | 41(2) | -9(1)  | -9(1)  | -21(1) |
| C(18) | 26(1) | 31(1) | 46(2) | -15(1) | -4(1)  | -8(1)  |
| Fe(1) | 14(1) | 15(1) | 16(1) | -5(1)  | -3(1)  | -4(1)  |
| O(1)  | 44(1) | 42(1) | 45(1) | -26(1) | -17(1) | -9(1)  |
| S(1)  | 16(1) | 21(1) | 21(1) | -4(1)  | -2(1)  | -6(1)  |
| S(2)  | 19(1) | 15(1) | 19(1) | -4(1)  | -1(1)  | -4(1)  |
| N(1)  | 17(1) | 17(1) | 18(1) | -5(1)  | -5(1)  | -5(1)  |
| N(2)  | 17(1) | 18(1) | 16(1) | -6(1)  | -2(1)  | -5(1)  |
| N(3)  | 16(1) | 16(1) | 16(1) | -3(1)  | -2(1)  | -5(1)  |
| N(4)  | 60(2) | 64(2) | 58(2) | -34(2) | -7(1)  | -18(1) |

**Table S-28.** Hydrogen coordinates (  $\times 10^4$  ) and isotropic displacement parameters ( $\text{Å}^2 \times 10^3$ ) for  $[\text{Fe}(\text{II})(\text{tame N}_3)\text{S}_2^{\text{Me}_2}(\text{CO})] \cdot \text{MeCN}$  (**16**).

|        | x     | y     | z     | U(eq) |
|--------|-------|-------|-------|-------|
| H(1A)  | 4823  | -1545 | -1857 | 50    |
| H(1B)  | 3466  | -205  | -1925 | 50    |
| H(1C)  | 4781  | -237  | -2972 | 50    |
| H(2A)  | 5278  | -3013 | -3260 | 51    |
| H(2B)  | 5192  | -1679 | -4355 | 51    |
| H(2C)  | 4158  | -2593 | -4142 | 51    |
| H(5A)  | 4380  | -3810 | -1558 | 43    |
| H(5B)  | 3059  | -4355 | -1455 | 43    |
| H(5C)  | 3085  | -3663 | -502  | 43    |
| H(6A)  | -3444 | 3974  | -1711 | 43    |
| H(6B)  | -2405 | 4564  | -2832 | 43    |
| H(6C)  | -1750 | 3237  | -1825 | 43    |
| H(7A)  | -4909 | 3848  | -3088 | 45    |
| H(7B)  | -4146 | 2991  | -4024 | 45    |
| H(7C)  | -3844 | 4403  | -4204 | 45    |
| H(10A) | -5093 | 2532  | -1469 | 45    |
| H(10B) | -4369 | 1303  | -428  | 45    |
| H(10C) | -4920 | 982   | -1389 | 45    |
| H(11A) | 800   | -3633 | -1198 | 23    |
| H(11B) | 143   | -2647 | -358  | 23    |
| H(12A) | -2200 | -1128 | -342  | 22    |
| H(12B) | -3264 | -940  | -1200 | 22    |
| H(13A) | -2089 | -1867 | -3042 | 23    |
| H(13B) | -512  | -2932 | -3050 | 23    |
| H(15A) | -1945 | -3677 | -28   | 42    |
| H(15B) | -1226 | -4337 | -1097 | 42    |
| H(15C) | -2813 | -3291 | -1085 | 42    |
| H(17A) | 1796  | 4669  | -4893 | 59    |
| H(17B) | 806   | 3638  | -4051 | 59    |
| H(17C) | 2613  | 2992  | -4318 | 59    |
| H(3N)  | -1216 | -219  | -4206 | 18    |
| H(3NB) | 444   | -1316 | -4203 | 18    |

**Table S-29.** Crystal data and structure refinement [Fe(III)(tame-  
N<sub>3</sub>)S<sub>2</sub><sup>Me2</sup>](NO)](PF<sub>6</sub>)•MeCN (**18**).

|                                   |                                                                                                                                 |
|-----------------------------------|---------------------------------------------------------------------------------------------------------------------------------|
| Compound                          | C15 H29 Fe N4 O S2 <sup>+</sup> PF6 *C2H3N                                                                                      |
| Empirical formula                 | C17 H32 F6 Fe N5 O P S2                                                                                                         |
| Formula weight                    | 587.42                                                                                                                          |
| Temperature                       | 161(2) K                                                                                                                        |
| Wavelength                        | 0.71070 Å                                                                                                                       |
| Crystal description/color         | plate/orange                                                                                                                    |
| Crystal system, space group       | Monoclinic, P 21/c (No. 14)                                                                                                     |
| Unit cell dimensions              | a = 11.8332(4) Å alpha = 90 deg.<br>b = 16.5201(6) Å beta = 106.7848(18) deg.<br>c = 13.3947(3) Å gamma = 90 deg.               |
| Volume                            | 2506.91(14) Å <sup>3</sup>                                                                                                      |
| Z, Calculated density             | 4, 1.556 Mg/m <sup>3</sup>                                                                                                      |
| Absorption coefficient            | 0.897 mm <sup>-1</sup>                                                                                                          |
| F(000)                            | 1216                                                                                                                            |
| Crystal size                      | 0.25 x 0.20 x 0.13 mm                                                                                                           |
| Reflections for indexing          | 1416                                                                                                                            |
| Theta range for data collection   | 2.18 to 30.49 deg.                                                                                                              |
| Index ranges                      | -16<=h<=16, -21<=k<=23, -19<=l<=19                                                                                              |
| Reflections collected / unique    | 46749 / 7487 [R(int) = 0.0668]                                                                                                  |
| Completeness to 2theta = 30.49    | 95.2%                                                                                                                           |
| Absorption correction             | None                                                                                                                            |
| Refinement method                 | Full-matrix least-squares on F <sup>2</sup>                                                                                     |
| Data / restraints / parameters    | 7487 / 0 / 298                                                                                                                  |
| Goodness-of-fit on F <sup>2</sup> | 1.057                                                                                                                           |
| Final R indices [I>2sigma(I)]     | *R1 = 0.0503, wR2 = 0.1324                                                                                                      |
| R indices (all data)              | R1 = 0.0794, *wR2 = 0.1508                                                                                                      |
| *Report these R factors           |                                                                                                                                 |
| Weighting scheme                  | calc w=1/[\s <sup>2</sup> (Fo <sup>2</sup> )+(0.0792P) <sup>2</sup> +0.3100P]<br>where P=(Fo <sup>2</sup> +2Fc <sup>2</sup> )/3 |
| Largest diff. peak and hole       | 0.757 and -0.991 e.Å <sup>-3</sup>                                                                                              |

**Table S-30.** Atomic coordinates ( $\times 10^4$ ) and equivalent isotropic displacement parameters ( $\text{\AA}^2 \times 10^3$ ) for  $[\text{Fe}(\text{III})(\text{tame-N}_3)\text{S}_2^{\text{Me}_2}(\text{NO})](\text{PF}_6) \cdot \text{MeCN}$  (**18**).  $U(\text{eq})$  is defined as one third of the trace of the orthogonalized  $U_{ij}$  tensor.

|       | x       | y       | z       | $U(\text{eq})$ |
|-------|---------|---------|---------|----------------|
| C(1)  | 9644(2) | 2166(2) | 6259(2) | 33(1)          |
| C(2)  | 8871(3) | 1078(2) | 4926(2) | 37(1)          |
| C(3)  | 8554(2) | 1847(2) | 5427(2) | 27(1)          |
| C(4)  | 8069(2) | 2490(2) | 4604(2) | 25(1)          |
| C(5)  | 8917(2) | 2913(2) | 4136(2) | 37(1)          |
| C(6)  | 2302(3) | 1483(2) | 5237(2) | 41(1)          |
| C(7)  | 3041(3) | 641(2)  | 3987(2) | 36(1)          |
| C(8)  | 3266(2) | 1400(2) | 4671(2) | 26(1)          |
| C(9)  | 3275(2) | 2131(2) | 3986(2) | 24(1)          |
| C(10) | 2103(2) | 2443(2) | 3317(2) | 35(1)          |
| C(11) | 6498(2) | 3349(2) | 3654(2) | 27(1)          |
| C(12) | 4287(2) | 3166(2) | 3334(2) | 24(1)          |
| C(13) | 5516(2) | 3802(1) | 5010(2) | 25(1)          |
| C(14) | 5377(2) | 3686(1) | 3841(2) | 23(1)          |
| C(15) | 5158(3) | 4525(2) | 3322(2) | 30(1)          |
| C(16) | 2637(3) | 1191(2) | 1205(3) | 44(1)          |
| C(17) | 1579(3) | 699(2)  | 1054(3) | 56(1)          |
| Fe(1) | 5813(1) | 2003(1) | 4841(1) | 19(1)          |
| F(1)  | 8695(2) | 4265(1) | 5909(1) | 52(1)          |
| F(2)  | 7722(2) | 4186(1) | 7128(2) | 52(1)          |
| F(3)  | 9716(2) | 4283(2) | 7619(2) | 62(1)          |
| F(4)  | 8605(2) | 5336(2) | 7866(2) | 68(1)          |
| F(5)  | 7590(2) | 5317(1) | 6141(2) | 50(1)          |
| F(6)  | 9575(2) | 5416(1) | 6636(2) | 59(1)          |
| N(1)  | 6959(2) | 2659(1) | 4336(2) | 22(1)          |
| N(2)  | 4264(2) | 2438(1) | 3963(1) | 21(1)          |
| N(3)  | 5744(2) | 3037(1) | 5643(2) | 23(1)          |
| N(4)  | 5860(2) | 1229(1) | 4092(2) | 25(1)          |
| N(5)  | 3472(3) | 1571(2) | 1348(3) | 61(1)          |
| P(1)  | 8656(1) | 4803(1) | 6897(1) | 36(1)          |
| S(1)  | 7442(1) | 1623(1) | 6108(1) | 25(1)          |
| S(2)  | 4694(1) | 1349(1) | 5684(1) | 26(1)          |
| O(1)  | 5902(2) | 705(1)  | 3550(2) | 48(1)          |

**Table S-31.** Bond lengths [Å] and angles [deg] for [Fe(III)(tame-  
N<sub>3</sub>)S<sub>2</sub><sup>Me<sub>2</sub></sup>](NO)](PF<sub>6</sub>)•MeCN (**18**).

---

|              |          |
|--------------|----------|
| C(1)-C(3)    | 1.534(3) |
| C(1)-H(1A)   | 1.0768   |
| C(1)-H(1B)   | 0.9150   |
| C(1)-H(1C)   | 0.9437   |
| C(2)-C(3)    | 1.534(4) |
| C(2)-H(2A)   | 0.9301   |
| C(2)-H(2B)   | 0.8721   |
| C(2)-H(2C)   | 0.9089   |
| C(3)-C(4)    | 1.519(4) |
| C(3)-S(1)    | 1.841(3) |
| C(4)-N(1)    | 1.288(3) |
| C(4)-C(5)    | 1.501(4) |
| C(5)-H(5A)   | 0.9291   |
| C(5)-H(5B)   | 1.0752   |
| C(5)-H(5C)   | 1.0234   |
| C(6)-C(8)    | 1.548(4) |
| C(6)-H(6A)   | 1.0314   |
| C(6)-H(6B)   | 0.9155   |
| C(6)-H(6C)   | 0.9594   |
| C(7)-C(8)    | 1.531(4) |
| C(7)-H(7A)   | 1.0309   |
| C(7)-H(7B)   | 1.0774   |
| C(7)-H(7C)   | 0.8245   |
| C(8)-C(9)    | 1.519(3) |
| C(8)-S(2)    | 1.838(3) |
| C(9)-N(2)    | 1.283(3) |
| C(9)-C(10)   | 1.507(3) |
| C(10)-H(10A) | 1.0242   |
| C(10)-H(10B) | 0.9147   |
| C(10)-H(10C) | 0.8763   |
| C(11)-N(1)   | 1.464(3) |
| C(11)-C(14)  | 1.525(3) |
| C(11)-H(11A) | 0.9242   |
| C(11)-H(11B) | 0.9636   |
| C(12)-N(2)   | 1.473(3) |
| C(12)-C(14)  | 1.535(3) |
| C(12)-H(12A) | 0.9570   |
| C(12)-H(12B) | 0.9204   |
| C(13)-N(3)   | 1.504(3) |
| C(13)-C(14)  | 1.538(3) |

|                  |            |
|------------------|------------|
| C(13)-H(13A)     | 0.9372     |
| C(13)-H(13B)     | 0.8508     |
| C(14)-C(15)      | 1.539(3)   |
| C(15)-H(15A)     | 0.9761     |
| C(15)-H(15B)     | 0.9461     |
| C(15)-H(15C)     | 0.9764     |
| C(16)-N(5)       | 1.139(4)   |
| C(16)-C(17)      | 1.457(5)   |
| C(17)-H(17A)     | 1.0100     |
| C(17)-H(17B)     | 1.0100     |
| C(17)-H(17C)     | 1.0100     |
| Fe(1)-N(4)       | 1.636(2)   |
| Fe(1)-N(1)       | 2.000(2)   |
| Fe(1)-N(2)       | 2.0044(19) |
| Fe(1)-N(3)       | 2.032(2)   |
| Fe(1)-S(2)       | 2.2499(7)  |
| Fe(1)-S(1)       | 2.2586(7)  |
| F(1)-P(1)        | 1.6057(18) |
| F(2)-P(1)        | 1.597(2)   |
| F(3)-P(1)        | 1.596(2)   |
| F(4)-P(1)        | 1.584(2)   |
| F(5)-P(1)        | 1.612(2)   |
| F(6)-P(1)        | 1.596(2)   |
| N(3)-H(3A)       | 0.8861     |
| N(3)-H(3B)       | 0.8548     |
| N(4)-O(1)        | 1.140(3)   |
| C(3)-C(1)-H(1A)  | 107.4      |
| C(3)-C(1)-H(1B)  | 112.4      |
| H(1A)-C(1)-H(1B) | 106.1      |
| C(3)-C(1)-H(1C)  | 110.7      |
| H(1A)-C(1)-H(1C) | 110.5      |
| H(1B)-C(1)-H(1C) | 109.6      |
| C(3)-C(2)-H(2A)  | 113.5      |
| C(3)-C(2)-H(2B)  | 110.6      |
| H(2A)-C(2)-H(2B) | 106.4      |
| C(3)-C(2)-H(2C)  | 114.2      |
| H(2A)-C(2)-H(2C) | 109.9      |
| H(2B)-C(2)-H(2C) | 101.2      |
| C(4)-C(3)-C(2)   | 110.5(2)   |
| C(4)-C(3)-C(1)   | 110.4(2)   |
| C(2)-C(3)-C(1)   | 110.0(2)   |
| C(4)-C(3)-S(1)   | 109.02(17) |
| C(2)-C(3)-S(1)   | 110.53(19) |
| C(1)-C(3)-S(1)   | 106.35(17) |
| N(1)-C(4)-C(5)   | 122.2(2)   |
| N(1)-C(4)-C(3)   | 119.7(2)   |



|                     |            |
|---------------------|------------|
| C(5)-C(4)-C(3)      | 118.1(2)   |
| C(4)-C(5)-H(5A)     | 114.0      |
| C(4)-C(5)-H(5B)     | 110.1      |
| H(5A)-C(5)-H(5B)    | 103.6      |
| C(4)-C(5)-H(5C)     | 106.2      |
| H(5A)-C(5)-H(5C)    | 106.0      |
| H(5B)-C(5)-H(5C)    | 117.1      |
| C(8)-C(6)-H(6A)     | 108.2      |
| C(8)-C(6)-H(6B)     | 108.6      |
| H(6A)-C(6)-H(6B)    | 113.3      |
| C(8)-C(6)-H(6C)     | 108.6      |
| H(6A)-C(6)-H(6C)    | 117.4      |
| H(6B)-C(6)-H(6C)    | 100.2      |
| C(8)-C(7)-H(7A)     | 112.9      |
| C(8)-C(7)-H(7B)     | 105.2      |
| H(7A)-C(7)-H(7B)    | 108.6      |
| C(8)-C(7)-H(7C)     | 111.5      |
| H(7A)-C(7)-H(7C)    | 116.8      |
| H(7B)-C(7)-H(7C)    | 100.4      |
| C(9)-C(8)-C(7)      | 108.7(2)   |
| C(9)-C(8)-C(6)      | 111.1(2)   |
| C(7)-C(8)-C(6)      | 109.9(2)   |
| C(9)-C(8)-S(2)      | 108.52(16) |
| C(7)-C(8)-S(2)      | 111.60(18) |
| C(6)-C(8)-S(2)      | 107.04(18) |
| N(2)-C(9)-C(10)     | 122.7(2)   |
| N(2)-C(9)-C(8)      | 119.6(2)   |
| C(10)-C(9)-C(8)     | 117.7(2)   |
| C(9)-C(10)-H(10A)   | 104.5      |
| C(9)-C(10)-H(10B)   | 107.3      |
| H(10A)-C(10)-H(10B) | 111.7      |
| C(9)-C(10)-H(10C)   | 107.5      |
| H(10A)-C(10)-H(10C) | 115.1      |
| H(10B)-C(10)-H(10C) | 110.2      |
| N(1)-C(11)-C(14)    | 111.51(19) |
| N(1)-C(11)-H(11A)   | 117.6      |
| C(14)-C(11)-H(11A)  | 107.6      |
| N(1)-C(11)-H(11B)   | 104.9      |
| C(14)-C(11)-H(11B)  | 119.6      |
| H(11A)-C(11)-H(11B) | 95.2       |
| N(2)-C(12)-C(14)    | 110.87(19) |
| N(2)-C(12)-H(12A)   | 106.4      |
| C(14)-C(12)-H(12A)  | 109.1      |
| N(2)-C(12)-H(12B)   | 108.0      |
| C(14)-C(12)-H(12B)  | 102.3      |
| H(12A)-C(12)-H(12B) | 120.0      |
| N(3)-C(13)-C(14)    | 114.74(19) |

|                     |            |
|---------------------|------------|
| N(3)-C(13)-H(13A)   | 103.0      |
| C(14)-C(13)-H(13A)  | 113.7      |
| N(3)-C(13)-H(13B)   | 115.8      |
| C(14)-C(13)-H(13B)  | 107.2      |
| H(13A)-C(13)-H(13B) | 101.7      |
| C(11)-C(14)-C(12)   | 112.5(2)   |
| C(11)-C(14)-C(13)   | 111.7(2)   |
| C(12)-C(14)-C(13)   | 110.4(2)   |
| C(11)-C(14)-C(15)   | 107.2(2)   |
| C(12)-C(14)-C(15)   | 107.1(2)   |
| C(13)-C(14)-C(15)   | 107.58(19) |
| C(14)-C(15)-H(15A)  | 110.3      |
| C(14)-C(15)-H(15B)  | 110.0      |
| H(15A)-C(15)-H(15B) | 110.6      |
| C(14)-C(15)-H(15C)  | 108.6      |
| H(15A)-C(15)-H(15C) | 101.2      |
| H(15B)-C(15)-H(15C) | 115.8      |
| N(5)-C(16)-C(17)    | 178.4(4)   |
| C(16)-C(17)-H(17A)  | 109.5      |
| C(16)-C(17)-H(17B)  | 109.5      |
| H(17A)-C(17)-H(17B) | 109.5      |
| C(16)-C(17)-H(17C)  | 109.5      |
| H(17A)-C(17)-H(17C) | 109.5      |
| H(17B)-C(17)-H(17C) | 109.5      |
| N(4)-Fe(1)-N(1)     | 94.05(9)   |
| N(4)-Fe(1)-N(2)     | 96.18(9)   |
| N(1)-Fe(1)-N(2)     | 101.66(8)  |
| N(4)-Fe(1)-N(3)     | 174.21(9)  |
| N(1)-Fe(1)-N(3)     | 81.84(8)   |
| N(2)-Fe(1)-N(3)     | 80.74(8)   |
| N(4)-Fe(1)-S(2)     | 93.48(8)   |
| N(1)-Fe(1)-S(2)     | 170.03(6)  |
| N(2)-Fe(1)-S(2)     | 83.99(6)   |
| N(3)-Fe(1)-S(2)     | 91.08(6)   |
| N(4)-Fe(1)-S(1)     | 94.06(8)   |
| N(1)-Fe(1)-S(1)     | 83.69(6)   |
| N(2)-Fe(1)-S(1)     | 168.05(6)  |
| N(3)-Fe(1)-S(1)     | 89.56(6)   |
| S(2)-Fe(1)-S(1)     | 89.28(2)   |
| C(4)-N(1)-C(11)     | 120.6(2)   |
| C(4)-N(1)-Fe(1)     | 121.60(17) |
| C(11)-N(1)-Fe(1)    | 117.77(16) |
| C(9)-N(2)-C(12)     | 120.3(2)   |
| C(9)-N(2)-Fe(1)     | 122.02(17) |
| C(12)-N(2)-Fe(1)    | 117.59(15) |
| C(13)-N(3)-Fe(1)    | 115.87(14) |
| C(13)-N(3)-H(3A)    | 110.6      |

|                  |            |
|------------------|------------|
| Fe(1)-N(3)-H(3A) | 110.1      |
| C(13)-N(3)-H(3B) | 104.0      |
| Fe(1)-N(3)-H(3B) | 105.4      |
| H(3A)-N(3)-H(3B) | 110.5      |
| O(1)-N(4)-Fe(1)  | 178.0(2)   |
| F(4)-P(1)-F(3)   | 90.66(13)  |
| F(4)-P(1)-F(6)   | 90.91(12)  |
| F(3)-P(1)-F(6)   | 90.53(13)  |
| F(4)-P(1)-F(2)   | 90.19(12)  |
| F(3)-P(1)-F(2)   | 90.29(12)  |
| F(6)-P(1)-F(2)   | 178.63(11) |
| F(4)-P(1)-F(1)   | 179.47(13) |
| F(3)-P(1)-F(1)   | 89.84(11)  |
| F(6)-P(1)-F(1)   | 89.27(12)  |
| F(2)-P(1)-F(1)   | 89.63(11)  |
| F(4)-P(1)-F(5)   | 90.78(13)  |
| F(3)-P(1)-F(5)   | 178.55(11) |
| F(6)-P(1)-F(5)   | 89.27(12)  |
| F(2)-P(1)-F(5)   | 89.88(11)  |
| F(1)-P(1)-F(5)   | 88.72(10)  |
| C(3)-S(1)-Fe(1)  | 98.54(8)   |
| C(8)-S(2)-Fe(1)  | 98.99(8)   |

---

**Table S-32.** Anisotropic displacement parameters ( $\text{Å}^2 \times 10^3$ ) for  
 $[\text{Fe}(\text{III})(\text{tame-N}_3)\text{S}_2^{\text{Me}_2})(\text{NO})](\text{PF}_6) \cdot \text{MeCN}$  (**18**). The anisotropic  
displacement factor exponent takes the form:  $-2 \pi^2 [h^2 a^{*2}$   
 $U_{11} + \dots + 2 h k a^* b^* U_{12}]$

|       | U11   | U22   | U33   | U23    | U13   | U12    |
|-------|-------|-------|-------|--------|-------|--------|
| C(1)  | 18(1) | 43(2) | 32(1) | -2(1)  | -1(1) | -1(1)  |
| C(2)  | 27(1) | 43(2) | 40(1) | -8(1)  | 6(1)  | 6(1)   |
| C(3)  | 17(1) | 36(1) | 26(1) | -2(1)  | 4(1)  | 2(1)   |
| C(4)  | 22(1) | 31(1) | 22(1) | -5(1)  | 7(1)  | -2(1)  |
| C(5)  | 23(1) | 56(2) | 32(1) | 2(1)   | 10(1) | -2(1)  |
| C(6)  | 25(1) | 55(2) | 44(2) | 6(1)   | 14(1) | -6(1)  |
| C(7)  | 33(1) | 31(1) | 37(1) | -1(1)  | 1(1)  | -7(1)  |
| C(8)  | 18(1) | 31(1) | 28(1) | 4(1)   | 4(1)  | -1(1)  |
| C(9)  | 19(1) | 28(1) | 22(1) | -3(1)  | 2(1)  | 1(1)   |
| C(10) | 21(1) | 38(2) | 40(1) | 7(1)   | -1(1) | 2(1)   |
| C(11) | 26(1) | 30(1) | 27(1) | 7(1)   | 10(1) | 2(1)   |
| C(12) | 24(1) | 25(1) | 22(1) | 1(1)   | 2(1)  | 0(1)   |
| C(13) | 29(1) | 22(1) | 22(1) | -1(1)  | 4(1)  | 1(1)   |
| C(14) | 24(1) | 22(1) | 22(1) | 0(1)   | 6(1)  | -1(1)  |
| C(15) | 35(1) | 24(1) | 29(1) | 2(1)   | 7(1)  | 0(1)   |
| C(16) | 44(2) | 39(2) | 55(2) | 0(1)   | 24(2) | 6(1)   |
| C(17) | 42(2) | 74(3) | 54(2) | -16(2) | 17(2) | -11(2) |
| Fe(1) | 17(1) | 22(1) | 17(1) | -1(1)  | 2(1)  | 0(1)   |
| F(1)  | 61(1) | 56(1) | 36(1) | -12(1) | 12(1) | 10(1)  |
| F(2)  | 43(1) | 64(1) | 48(1) | -1(1)  | 10(1) | -17(1) |
| F(3)  | 39(1) | 94(2) | 44(1) | 10(1)  | -1(1) | 9(1)   |
| F(4)  | 74(2) | 82(2) | 52(1) | -36(1) | 28(1) | -20(1) |
| F(5)  | 38(1) | 52(1) | 59(1) | 2(1)   | 11(1) | 9(1)   |
| F(6)  | 47(1) | 71(1) | 62(1) | -4(1)  | 19(1) | -22(1) |
| N(1)  | 21(1) | 24(1) | 20(1) | -1(1)  | 4(1)  | -2(1)  |
| N(2)  | 20(1) | 24(1) | 18(1) | 1(1)   | 4(1)  | 2(1)   |
| N(3)  | 24(1) | 27(1) | 17(1) | -1(1)  | 4(1)  | 0(1)   |
| N(4)  | 21(1) | 27(1) | 24(1) | -4(1)  | 2(1)  | -1(1)  |
| N(5)  | 57(2) | 43(2) | 97(3) | -4(2)  | 44(2) | -4(2)  |
| P(1)  | 30(1) | 45(1) | 32(1) | -9(1)  | 7(1)  | -4(1)  |
| S(1)  | 20(1) | 32(1) | 21(1) | 2(1)   | 1(1)  | 2(1)   |
| S(2)  | 23(1) | 31(1) | 22(1) | 5(1)   | 4(1)  | -3(1)  |
| O(1)  | 43(1) | 48(1) | 54(1) | -29(1) | 14(1) | -5(1)  |

**Table S-33.** Hydrogen coordinates (  $\times 10^4$ ) and isotropic displacement parameters ( $\text{\AA}^2 \times 10^3$ ) for  $[\text{Fe}(\text{III})(\text{tame-N}_3)_2\text{S}_2^{\text{Me}_2})(\text{NO})](\text{PF}_6) \cdot \text{MeCN}$  (**18**).

|        | x     | y    | z    | U(eq) |
|--------|-------|------|------|-------|
| H(1A)  | 9900  | 1713 | 6859 | 50    |
| H(1B)  | 10278 | 2235 | 6006 | 50    |
| H(1C)  | 9472  | 2660 | 6540 | 50    |
| H(2A)  | 9197  | 673  | 5405 | 56    |
| H(2B)  | 9390  | 1185 | 4596 | 56    |
| H(2C)  | 8269  | 873  | 4402 | 56    |
| H(5A)  | 9601  | 2621 | 4181 | 55    |
| H(5B)  | 9236  | 3459 | 4561 | 55    |
| H(5C)  | 8493  | 2971 | 3357 | 55    |
| H(6A)  | 2372  | 2051 | 5569 | 61    |
| H(6B)  | 1582  | 1388 | 4766 | 61    |
| H(6C)  | 2354  | 1026 | 5690 | 61    |
| H(7A)  | 3603  | 593  | 3528 | 54    |
| H(7B)  | 2152  | 706  | 3486 | 54    |
| H(7C)  | 2966  | 236  | 4322 | 54    |
| H(10A) | 1534  | 1968 | 3271 | 53    |
| H(10B) | 2192  | 2569 | 2679 | 53    |
| H(10C) | 1934  | 2879 | 3618 | 53    |
| H(11A) | 7002  | 3779 | 3668 | 30    |
| H(11B) | 6483  | 3169 | 2966 | 30    |
| H(12A) | 4331  | 2979 | 2670 | 27    |
| H(12B) | 3677  | 3498 | 3374 | 27    |
| H(13A) | 4843  | 4014 | 5150 | 28    |
| H(13B) | 6014  | 4181 | 5224 | 28    |
| H(15A) | 5827  | 4882 | 3623 | 45    |
| H(15B) | 4454  | 4750 | 3402 | 45    |
| H(15C) | 5196  | 4476 | 2606 | 45    |
| H(17A) | 1786  | 182  | 1471 | 84    |
| H(17B) | 1247  | 563  | 290  | 84    |
| H(17C) | 972   | 1010 | 1296 | 84    |
| H(3A)  | 5227  | 2983 | 6003 | 25    |
| H(3B)  | 6440  | 3101 | 6054 | 25    |

**Table S-34.** Crystal data and structure refinement for  
 $[\text{Fe}(\text{III})((\text{tame}-\text{N}_3)\text{S}_2^{\text{Me}_2})(\text{MeCN})](\text{PF}_6) \cdot \text{MeCN}$  (**19**).

|                                   |                                                                                                         |
|-----------------------------------|---------------------------------------------------------------------------------------------------------|
| Compound                          | C15 H29 Fe N5 S2 <sup>+</sup> PF6 <sup>-</sup> *2CH3CN                                                  |
| Empirical formula                 | C19 H41 F6 Fe N5 P S2                                                                                   |
| Formula weight                    | 604.51                                                                                                  |
| Temperature                       | 161(2) K                                                                                                |
| Wavelength                        | 0.71070 Å                                                                                               |
| Crystal system, space group       | Orthorhombic, P 21 21 21 (No. 19)                                                                       |
| Unit cell dimensions              | a = 13.1206(3) Å alpha = 90 deg.<br>b = 13.6458(2) Å beta = 90 deg.<br>c = 14.9657(4) Å gamma = 90 deg. |
| Volume                            | 2679.48(10) Å <sup>3</sup>                                                                              |
| Z, Calculated density             | 4, 1.499 Mg/m <sup>3</sup>                                                                              |
| Reflections used for indexing     | 821                                                                                                     |
| Absorption coefficient            | 0.838 mm <sup>-1</sup>                                                                                  |
| F(000)                            | 1268                                                                                                    |
| Crystal description / color       | plate / purple                                                                                          |
| Crystal size                      | 0.34 x 0.30 x 0.20 mm                                                                                   |
| Theta range for data collection   | 2.06 to 30.47 deg.                                                                                      |
| Index ranges                      | -18<=h<=18, -17<=k<=17, -21<=l<=21                                                                      |
| Reflections collected / unique    | 52433 / 7859 [R(int) = 0.051]                                                                           |
| Completeness to 2theta = 30.47    | 97.5%                                                                                                   |
| Absorption correction             | SCALEPACK                                                                                               |
| Max. and min. transmission        | 0.8503 and 0.7637                                                                                       |
| Refinement method                 | Full-matrix least-squares on F <sup>2</sup>                                                             |
| Data / restraints / parameters    | 7859 / 0 / 309                                                                                          |
| Goodness-of-fit on F <sup>2</sup> | 1.036                                                                                                   |
| Final R indices [I>4sigma(I)]     | *R1 = 0.0534, wR2 = 0.1534                                                                              |
| R indices (all data)              | R1 = 0.0876, *wR2 = 0.1691                                                                              |
| *Report these R factors           |                                                                                                         |
| Weighting scheme                  | calc w=1/[\s^2^(Fo^2^)+(0.1061P)^2^+0.0000P]<br>where P=(Fo^2^+2Fc^2^)/3                                |
| Absolute structure parameter      | 0.31(2)                                                                                                 |
| Largest diff. peak and hole       | 0.660 and -0.841 e.Å <sup>-3</sup>                                                                      |

**Table S-35.** Atomic coordinates (  $\times 10^4$ ) and equivalent isotropic displacement parameters ( $\text{\AA}^2 \times 10^3$ ) for [Fe(III)((tame- $\text{N}_3$ ) $\text{S}_2^{\text{Me}_2}$ )(MeCN)](PF<sub>6</sub>)•MeCN (**19**). U(eq) is defined as one third of the trace of the orthogonalized U<sub>ij</sub> tensor.

|       | x        | y       | z        | U(eq)  |
|-------|----------|---------|----------|--------|
| C(1)  | 9302(4)  | 4333(3) | 10385(3) | 37(1)  |
| C(2)  | 7960(3)  | 3171(3) | 9835(3)  | 36(1)  |
| C(3)  | 8954(3)  | 3713(3) | 9600(2)  | 25(1)  |
| C(4)  | 9779(3)  | 2980(3) | 9361(3)  | 25(1)  |
| C(5)  | 10135(3) | 2316(3) | 10088(3) | 32(1)  |
| C(6)  | 8977(4)  | 4297(3) | 4768(3)  | 36(1)  |
| C(7)  | 7678(3)  | 3132(3) | 5431(3)  | 37(1)  |
| C(8)  | 8705(3)  | 3667(3) | 5580(3)  | 29(1)  |
| C(9)  | 9530(3)  | 2925(3) | 5759(3)  | 27(1)  |
| C(10) | 9864(3)  | 2274(3) | 5010(3)  | 36(1)  |
| C(11) | 10954(3) | 2276(3) | 8351(3)  | 28(1)  |
| C(12) | 10853(3) | 2262(3) | 6661(3)  | 33(1)  |
| C(13) | 11492(3) | 2525(2) | 7473(3)  | 25(1)  |
| C(14) | 11852(3) | 3589(3) | 7456(3)  | 30(1)  |
| C(15) | 12457(3) | 1890(3) | 7433(3)  | 31(1)  |
| C(16) | 7506(3)  | 1692(3) | 7640(3)  | 44(1)  |
| C(17) | 6657(4)  | 1012(4) | 7668(4)  | 62(2)  |
| C(18) | 5325(5)  | 3484(5) | 7496(4)  | 69(2)  |
| C(19) | 5858(7)  | 4385(5) | 7714(5)  | 92(2)  |
| F(1)  | 12031(2) | 5458(2) | 9099(2)  | 54(1)  |
| F(2)  | 13417(2) | 4484(2) | 9213(2)  | 53(1)  |
| F(3)  | 11906(3) | 5516(2) | 10594(2) | 56(1)  |
| F(4)  | 11954(2) | 4055(2) | 9874(2)  | 60(1)  |
| F(5)  | 13378(2) | 5938(2) | 9924(3)  | 70(1)  |
| F(6)  | 13296(3) | 4537(2) | 10709(2) | 62(1)  |
| N(2)  | 10092(2) | 2927(2) | 8554(2)  | 21(1)  |
| N(3)  | 9959(2)  | 2906(2) | 6538(2)  | 25(1)  |
| N(1)  | 11009(2) | 4337(2) | 7483(2)  | 27(1)  |
| N(4)  | 8161(3)  | 2265(3) | 7648(3)  | 55(1)  |
| N(5)  | 4924(6)  | 2753(6) | 7368(5)  | 115(3) |
| P(1)  | 12666(1) | 5000(1) | 9903(1)  | 34(1)  |
| S(1)  | 8721(1)  | 4528(1) | 8640(1)  | 28(1)  |
| S(2)  | 8571(1)  | 4490(1) | 6554(1)  | 30(1)  |
| Fe(1) | 9472(1)  | 3723(1) | 7562(1)  | 27(1)  |

**Table S-36.** Bond lengths [Å] and angles [deg] for  
 $[\text{Fe}(\text{III})((\text{tameN}_3)\text{S}_2^{\text{Me}_2})(\text{MeCN})](\text{PF}_6) \cdot \text{MeCN}$  (**19**).

---

|              |          |
|--------------|----------|
| C(1)-C(3)    | 1.518(5) |
| C(1)-H(1A)   | 1.0183   |
| C(1)-H(1B)   | 1.0720   |
| C(1)-H(1C)   | 1.0708   |
| C(2)-C(3)    | 1.540(5) |
| C(2)-H(2A)   | 1.0357   |
| C(2)-H(2B)   | 0.9971   |
| C(2)-H(2C)   | 1.0105   |
| C(3)-C(4)    | 1.516(5) |
| C(3)-S(1)    | 1.844(4) |
| C(4)-N(2)    | 1.278(5) |
| C(4)-C(5)    | 1.492(5) |
| C(5)-H(5A)   | 0.9594   |
| C(5)-H(5B)   | 1.0135   |
| C(5)-H(5C)   | 0.9859   |
| C(6)-C(8)    | 1.530(6) |
| C(6)-H(6A)   | 1.0616   |
| C(6)-H(6B)   | 0.9049   |
| C(6)-H(6C)   | 1.0778   |
| C(7)-C(8)    | 1.549(6) |
| C(7)-H(7A)   | 1.0456   |
| C(7)-H(7B)   | 0.9640   |
| C(7)-H(7C)   | 1.0160   |
| C(8)-C(9)    | 1.506(5) |
| C(8)-S(2)    | 1.849(4) |
| C(9)-N(3)    | 1.295(5) |
| C(9)-C(10)   | 1.495(6) |
| C(10)-H(10A) | 1.0100   |
| C(10)-H(10B) | 1.0100   |
| C(10)-H(10C) | 1.0100   |
| C(11)-N(2)   | 1.469(4) |
| C(11)-C(13)  | 1.531(5) |
| C(11)-H(11A) | 1.0100   |
| C(11)-H(11B) | 1.0100   |
| C(12)-N(3)   | 1.478(5) |
| C(12)-C(13)  | 1.518(6) |
| C(12)-H(12A) | 1.0100   |
| C(12)-H(12B) | 1.0100   |
| C(13)-C(14)  | 1.528(5) |
| C(13)-C(15)  | 1.535(4) |
| C(14)-N(1)   | 1.505(4) |
| C(14)-H(14A) | 1.0100   |
| C(14)-H(14B) | 1.0100   |
| C(15)-H(15A) | 1.0708   |



|                  |            |
|------------------|------------|
| C(15)-H(15B)     | 1.0094     |
| C(15)-H(15C)     | 1.0104     |
| C(16)-N(4)       | 1.161(6)   |
| C(16)-C(17)      | 1.450(7)   |
| C(17)-H(17A)     | 1.0100     |
| C(17)-H(17B)     | 1.0100     |
| C(17)-H(17C)     | 1.0100     |
| C(18)-N(5)       | 1.143(9)   |
| C(18)-C(19)      | 1.452(9)   |
| C(19)-H(19A)     | 1.0100     |
| C(19)-H(19B)     | 1.0100     |
| C(19)-H(19C)     | 1.0100     |
| F(1)-P(1)        | 1.590(3)   |
| F(2)-P(1)        | 1.591(3)   |
| F(3)-P(1)        | 1.600(3)   |
| F(4)-P(1)        | 1.593(3)   |
| F(5)-P(1)        | 1.586(3)   |
| F(6)-P(1)        | 1.594(3)   |
| N(1)-Fe(1)       | 2.011(3)   |
| N(3)-Fe(1)       | 2.000(3)   |
| N(1)-Fe(1)       | 2.186(3)   |
| N(1)-H(3A)       | 0.9599     |
| N(1)-H(3B)       | 0.9603     |
| S(1)-Fe(1)       | 2.1866(11) |
| S(2)-Fe(1)       | 2.1835(11) |
| C(3)-C(1)-H(1A)  | 104.7      |
| C(3)-C(1)-H(1B)  | 115.3      |
| H(1A)-C(1)-H(1B) | 91.7       |
| C(3)-C(1)-H(1C)  | 113.5      |
| H(1A)-C(1)-H(1C) | 127.5      |
| H(1B)-C(1)-H(1C) | 102.5      |
| C(3)-C(2)-H(2A)  | 108.6      |
| C(3)-C(2)-H(2B)  | 110.9      |
| H(2A)-C(2)-H(2B) | 98.8       |
| C(3)-C(2)-H(2C)  | 123.0      |
| H(2A)-C(2)-H(2C) | 107.3      |
| H(2B)-C(2)-H(2C) | 105.6      |
| C(4)-C(3)-C(1)   | 109.7(3)   |
| C(4)-C(3)-C(2)   | 110.0(3)   |
| C(1)-C(3)-C(2)   | 110.2(3)   |
| C(4)-C(3)-S(1)   | 109.4(2)   |
| C(1)-C(3)-S(1)   | 108.4(3)   |
| C(2)-C(3)-S(1)   | 109.0(3)   |
| N(1)-C(4)-C(5)   | 123.7(4)   |
| N(1)-C(4)-C(3)   | 119.4(3)   |
| C(5)-C(4)-C(3)   | 116.8(3)   |
| C(4)-C(5)-H(5A)  | 108.4      |
| C(4)-C(5)-H(5B)  | 106.0      |

|                     |          |
|---------------------|----------|
| H(5A)-C(5)-H(5B)    | 112.6    |
| C(4)-C(5)-H(5C)     | 114.2    |
| H(5A)-C(5)-H(5C)    | 97.4     |
| H(5B)-C(5)-H(5C)    | 118.0    |
| C(8)-C(6)-H(6A)     | 123.0    |
| C(8)-C(6)-H(6B)     | 113.2    |
| H(6A)-C(6)-H(6B)    | 89.9     |
| C(8)-C(6)-H(6C)     | 115.1    |
| H(6A)-C(6)-H(6C)    | 103.5    |
| H(6B)-C(6)-H(6C)    | 109.1    |
| C(8)-C(7)-H(7A)     | 95.6     |
| C(8)-C(7)-H(7B)     | 100.3    |
| H(7A)-C(7)-H(7B)    | 134.0    |
| C(8)-C(7)-H(7C)     | 101.8    |
| H(7A)-C(7)-H(7C)    | 103.3    |
| H(7B)-C(7)-H(7C)    | 115.0    |
| C(9)-C(8)-C(6)      | 110.6(3) |
| C(9)-C(8)-C(7)      | 109.5(3) |
| C(6)-C(8)-C(7)      | 110.7(3) |
| C(9)-C(8)-S(2)      | 109.7(3) |
| C(6)-C(8)-S(2)      | 107.9(3) |
| C(7)-C(8)-S(2)      | 108.4(3) |
| N(3)-C(9)-C(10)     | 122.4(4) |
| N(3)-C(9)-C(8)      | 119.0(3) |
| C(10)-C(9)-C(8)     | 118.5(3) |
| C(9)-C(10)-H(10A)   | 109.5    |
| C(9)-C(10)-H(10B)   | 109.5    |
| H(10A)-C(10)-H(10B) | 109.5    |
| C(9)-C(10)-H(10C)   | 109.5    |
| H(10A)-C(10)-H(10C) | 109.5    |
| H(10B)-C(10)-H(10C) | 109.5    |
| N(1)-C(11)-C(13)    | 113.4(3) |
| N(1)-C(11)-H(11A)   | 108.9    |
| C(13)-C(11)-H(11A)  | 108.9    |
| N(1)-C(11)-H(11B)   | 108.9    |
| C(13)-C(11)-H(11B)  | 108.9    |
| H(11A)-C(11)-H(11B) | 107.7    |
| N(3)-C(12)-C(13)    | 113.4(3) |
| N(3)-C(12)-H(12A)   | 108.9    |
| C(13)-C(12)-H(12A)  | 108.9    |
| N(3)-C(12)-H(12B)   | 108.9    |
| C(13)-C(12)-H(12B)  | 108.9    |
| H(12A)-C(12)-H(12B) | 107.7    |
| C(12)-C(13)-C(14)   | 112.5(3) |
| C(12)-C(13)-C(11)   | 112.3(3) |
| C(14)-C(13)-C(11)   | 111.5(3) |
| C(12)-C(13)-C(15)   | 106.9(3) |
| C(14)-C(13)-C(15)   | 106.3(3) |

|                     |            |
|---------------------|------------|
| C(11)-C(13)-C(15)   | 106.8(3)   |
| N(1)-C(14)-C(13)    | 114.6(3)   |
| N(1)-C(14)-H(14A)   | 108.6      |
| C(13)-C(14)-H(14A)  | 108.6      |
| N(1)-C(14)-H(14B)   | 108.6      |
| C(13)-C(14)-H(14B)  | 108.6      |
| H(14A)-C(14)-H(14B) | 107.6      |
| C(13)-C(15)-H(15A)  | 108.7      |
| C(13)-C(15)-H(15B)  | 112.5      |
| H(15A)-C(15)-H(15B) | 114.6      |
| C(13)-C(15)-H(15C)  | 120.0      |
| H(15A)-C(15)-H(15C) | 92.3       |
| H(15B)-C(15)-H(15C) | 107.4      |
| N(4)-C(16)-C(17)    | 176.7(5)   |
| C(16)-C(17)-H(17A)  | 109.5      |
| C(16)-C(17)-H(17B)  | 109.5      |
| H(17A)-C(17)-H(17B) | 109.5      |
| C(16)-C(17)-H(17C)  | 109.5      |
| H(17A)-C(17)-H(17C) | 109.5      |
| H(17B)-C(17)-H(17C) | 109.5      |
| N(5)-C(18)-C(19)    | 176.2(8)   |
| C(18)-C(19)-H(19A)  | 109.5      |
| C(18)-C(19)-H(19B)  | 109.5      |
| H(19A)-C(19)-H(19B) | 109.5      |
| C(18)-C(19)-H(19C)  | 109.5      |
| H(19A)-C(19)-H(19C) | 109.5      |
| H(19B)-C(19)-H(19C) | 109.5      |
| C(4)-N(1)-C(11)     | 118.5(3)   |
| C(4)-N(1)-Fe(1)     | 122.5(3)   |
| C(11)-N(1)-Fe(1)    | 119.1(2)   |
| C(9)-N(3)-C(12)     | 118.0(3)   |
| C(9)-N(3)-Fe(1)     | 122.7(3)   |
| C(12)-N(3)-Fe(1)    | 119.3(3)   |
| C(14)-N(1)-Fe(1)    | 114.8(2)   |
| C(14)-N(1)-H(3A)    | 106.5      |
| Fe(1)-N(1)-H(3A)    | 109.4      |
| C(14)-N(1)-H(3B)    | 107.1      |
| Fe(1)-N(1)-H(3B)    | 109.4      |
| H(3A)-N(1)-H(3B)    | 109.5      |
| F(5)-P(1)-F(1)      | 90.38(19)  |
| F(5)-P(1)-F(2)      | 90.29(19)  |
| F(1)-P(1)-F(2)      | 90.47(16)  |
| F(5)-P(1)-F(4)      | 179.5(2)   |
| F(1)-P(1)-F(4)      | 89.47(18)  |
| F(2)-P(1)-F(4)      | 89.25(17)  |
| F(5)-P(1)-F(6)      | 89.9(2)    |
| F(1)-P(1)-F(6)      | 179.68(19) |
| F(2)-P(1)-F(6)      | 89.65(17)  |

|                 |            |
|-----------------|------------|
| F(4)-P(1)-F(6)  | 90.24(19)  |
| F(5)-P(1)-F(3)  | 89.92(18)  |
| F(1)-P(1)-F(3)  | 89.45(17)  |
| F(2)-P(1)-F(3)  | 179.78(17) |
| F(4)-P(1)-F(3)  | 90.54(18)  |
| F(6)-P(1)-F(3)  | 90.43(17)  |
| C(3)-S(1)-Fe(1) | 101.36(12) |
| C(8)-S(2)-Fe(1) | 101.64(13) |
| N(3)-Fe(1)-N(2) | 97.76(11)  |
| N(3)-Fe(1)-S(2) | 84.91(10)  |
| N(1)-Fe(1)-S(2) | 170.97(9)  |
| N(3)-Fe(1)-S(1) | 171.66(10) |
| N(1)-Fe(1)-S(1) | 84.80(9)   |
| S(2)-Fe(1)-S(1) | 91.40(4)   |
| N(3)-Fe(1)-N(1) | 82.97(12)  |
| N(1)-Fe(1)-N(1) | 82.72(12)  |
| S(2)-Fe(1)-N(1) | 106.21(9)  |
| S(1)-Fe(1)-N(1) | 105.26(9)  |

---

**Table S-37.** Anisotropic displacement parameters ( $\text{Å}^2 \times 10^3$ ) for  $[\text{Fe}(\text{III})(\text{tame-N}_3\text{S}_2^{\text{Me}_2})(\text{MeCN})](\text{PF}_6) \cdot \text{MeCN}$  (**19**). The anisotropic displacement factor exponent takes the form:  $-2 \pi^2 [h^2 a^2 U_{11} + \dots + 2 h k a^* b^* U_{12}]$

|       | U11    | U22    | U33    | U23    | U13    | U12    |
|-------|--------|--------|--------|--------|--------|--------|
| C(1)  | 46(3)  | 36(2)  | 28(2)  | -2(2)  | 3(2)   | 2(2)   |
| C(2)  | 28(2)  | 38(2)  | 43(2)  | 9(2)   | 9(2)   | 4(2)   |
| C(3)  | 24(2)  | 27(2)  | 25(2)  | 3(2)   | 6(1)   | 2(2)   |
| C(4)  | 26(2)  | 18(2)  | 30(2)  | 3(1)   | -1(2)  | -4(1)  |
| C(5)  | 36(2)  | 33(2)  | 28(2)  | 7(2)   | 4(2)   | 9(2)   |
| C(6)  | 43(2)  | 39(2)  | 26(2)  | 1(2)   | -1(2)  | 1(2)   |
| C(7)  | 34(2)  | 38(2)  | 39(2)  | -5(2)  | -10(2) | -2(2)  |
| C(8)  | 39(2)  | 24(2)  | 25(2)  | -2(1)  | -3(2)  | 9(2)   |
| C(9)  | 28(2)  | 23(2)  | 29(2)  | 3(1)   | -1(2)  | -2(2)  |
| C(10) | 40(2)  | 37(2)  | 31(2)  | -11(2) | -10(2) | 2(2)   |
| C(11) | 24(2)  | 28(2)  | 32(2)  | 13(2)  | 3(2)   | 10(2)  |
| C(12) | 35(2)  | 34(2)  | 31(2)  | -5(2)  | -2(2)  | 11(2)  |
| C(13) | 23(2)  | 30(2)  | 23(2)  | 3(2)   | 2(2)   | 11(1)  |
| C(14) | 23(2)  | 33(2)  | 33(2)  | -3(2)  | 2(2)   | -1(1)  |
| C(15) | 25(2)  | 41(2)  | 27(2)  | -1(2)  | 0(2)   | 11(1)  |
| C(16) | 41(3)  | 43(2)  | 49(3)  | 5(2)   | 0(2)   | 1(2)   |
| C(17) | 62(3)  | 57(3)  | 69(4)  | -9(3)  | 7(3)   | -8(3)  |
| C(18) | 62(3)  | 97(4)  | 47(3)  | -3(3)  | -11(3) | -11(3) |
| C(19) | 108(6) | 99(5)  | 69(5)  | -12(4) | -7(4)  | -17(5) |
| F(1)  | 59(2)  | 63(2)  | 40(2)  | 4(1)   | -14(1) | 17(2)  |
| F(2)  | 51(2)  | 58(2)  | 49(2)  | -6(1)  | -5(1)  | 13(1)  |
| F(3)  | 70(2)  | 57(2)  | 40(2)  | -14(1) | -3(2)  | 14(2)  |
| F(4)  | 57(2)  | 36(1)  | 88(2)  | -9(2)  | 3(2)   | -13(1) |
| F(5)  | 50(2)  | 34(2)  | 126(3) | -7(2)  | -14(2) | -9(1)  |
| F(6)  | 74(2)  | 69(2)  | 44(2)  | -6(2)  | -27(2) | 26(2)  |
| N(2)  | 24(2)  | 17(2)  | 23(2)  | -2(1)  | 3(1)   | 0(1)   |
| N(3)  | 27(2)  | 23(2)  | 25(2)  | -1(1)  | 1(1)   | 1(1)   |
| N(1)  | 37(2)  | 23(1)  | 21(1)  | 4(1)   | -2(1)  | 4(1)   |
| N(4)  | 43(2)  | 70(3)  | 52(3)  | 6(2)   | 2(2)   | 2(2)   |
| N(5)  | 96(5)  | 153(6) | 94(5)  | -11(5) | -10(4) | -54(5) |
| P(1)  | 40(1)  | 26(1)  | 35(1)  | -4(1)  | -12(1) | -2(1)  |
| S(1)  | 32(1)  | 24(1)  | 26(1)  | 2(1)   | 4(1)   | 8(1)   |
| S(2)  | 35(1)  | 26(1)  | 28(1)  | -3(1)  | -6(1)  | 8(1)   |
| Fe(1) | 33(1)  | 25(1)  | 22(1)  | -1(1)  | -2(1)  | 10(1)  |

**Table S-38.** Hydrogen coordinates (  $\times 10^4$  ) and isotropic displacement parameters ( $\text{\AA}^2 \times 10^3$ ) for  $[\text{Fe}(\text{III})((\text{tame}-\text{N}_3)\text{S}_2^{\text{Me}_2})(\text{MeCN})](\text{PF}_6) \cdot \text{MeCN}$  (**19**).

|        | x     | y    | z     | U(eq) |
|--------|-------|------|-------|-------|
| H(1A)  | 9059  | 3961 | 10935 | 55    |
| H(1B)  | 8823  | 4946 | 10541 | 55    |
| H(1C)  | 10029 | 4672 | 10284 | 55    |
| H(2A)  | 7389  | 3685 | 9928  | 54    |
| H(2B)  | 7677  | 2831 | 9300  | 54    |
| H(2C)  | 7908  | 2682 | 10340 | 54    |
| H(5A)  | 10814 | 2504 | 10253 | 48    |
| H(5B)  | 9630  | 2398 | 10595 | 48    |
| H(5C)  | 10295 | 1645 | 9888  | 48    |
| H(6A)  | 9203  | 3995 | 4145  | 54    |
| H(6B)  | 9591  | 4594 | 4818  | 54    |
| H(6C)  | 8413  | 4835 | 4585  | 54    |
| H(7A)  | 7316  | 3722 | 5118  | 56    |
| H(7B)  | 7599  | 2814 | 6002  | 56    |
| H(7C)  | 7849  | 2677 | 4915  | 56    |
| H(10A) | 10419 | 1820 | 5228  | 54    |
| H(10B) | 10133 | 2688 | 4503  | 54    |
| H(10C) | 9265  | 1874 | 4794  | 54    |
| H(11A) | 10698 | 1579 | 8321  | 31    |
| H(11B) | 11464 | 2316 | 8855  | 31    |
| H(12A) | 11296 | 2300 | 6110  | 36    |
| H(12B) | 10611 | 1563 | 6724  | 36    |
| H(14A) | 12317 | 3702 | 7984  | 33    |
| H(14B) | 12267 | 3698 | 6896  | 33    |
| H(15A) | 12867 | 1973 | 8047  | 46    |
| H(15B) | 12874 | 2016 | 6878  | 46    |
| H(15C) | 12406 | 1156 | 7510  | 46    |
| H(17A) | 6500  | 841  | 8309  | 94    |
| H(17B) | 6842  | 397  | 7329  | 94    |
| H(17C) | 6040  | 1326 | 7384  | 94    |
| H(19A) | 5346  | 4928 | 7810  | 138   |
| H(19B) | 6328  | 4567 | 7205  | 138   |
| H(19C) | 6270  | 4288 | 8276  | 138   |
| H(3A)  | 11133 | 4739 | 7998  | 30    |
| H(3B)  | 11068 | 4728 | 6952  | 30    |

**Table S-39.** Crystal data and structure refinement for  $(\text{Me}_4\text{N})_2[\text{Fe}^{\text{III}}(\text{tame}-\text{N}_2\text{S})\text{S}_2^{\text{Me}_2}]\cdot 3\text{H}_2\text{O}$ . (**15a**)

|                                                                                               |                                                                                                                |
|-----------------------------------------------------------------------------------------------|----------------------------------------------------------------------------------------------------------------|
| Empirical formula                                                                             | C42 H96 Fe2 N8 O7 S6                                                                                           |
| Formula weight                                                                                | 1129.33                                                                                                        |
| Temperature                                                                                   | 130(2) K                                                                                                       |
| Wavelength                                                                                    | 0.71070 Å                                                                                                      |
| Crystal description/color                                                                     | block / dark red                                                                                               |
| Crystal system, space group                                                                   | Monoclinic, P 21/a (No.14)                                                                                     |
| Unit cell dimensions                                                                          | a = 18.8870(12)Å alpha = 90 deg.<br>b = 10.8610(8)Å beta = 101.867(3) deg.<br>c = 29.7740(17)Å gamma = 90 deg. |
| Volume                                                                                        | 5977.1(7) Å <sup>3</sup>                                                                                       |
| Z, Calculated density                                                                         | 4, 1.255 Mg/m <sup>3</sup>                                                                                     |
| Absorption coefficient                                                                        | 0.743 mm <sup>-1</sup>                                                                                         |
| F(000)                                                                                        | 2432                                                                                                           |
| Crystal size                                                                                  | 0.19 x 0.14 x 0.12 mm                                                                                          |
| Reflections for indexing                                                                      | 209                                                                                                            |
| Theta range for data collection                                                               | 3.01 to 22.72 deg.                                                                                             |
| Index ranges                                                                                  | -20<=h<=20, -11<=k<=11, -31<=l<=31                                                                             |
| Reflections collected / unique                                                                | 13626 / 7318 [R(int) = 0.1177]                                                                                 |
| Completeness to theta                                                                         | = 22.72 85.5%                                                                                                  |
| Absorption correction                                                                         | HKL-Scalepack                                                                                                  |
| Max. and min. transmission                                                                    | 0.9162 and 0.8717                                                                                              |
| Refinement method                                                                             | Full-matrix least-squares on F <sup>2</sup>                                                                    |
| Data / restraints / parameters                                                                | 7318 / 9 / 630                                                                                                 |
| Goodness-of-fit on F <sup>2</sup>                                                             | S = 0.910                                                                                                      |
| S = root(sum(w*D*D)/(n-p)), where D = (Fo*Fo - Fc*Fc)                                         |                                                                                                                |
| Final R indices [I>2sigma(I)]                                                                 | *R1 = 0.0588, wR2 = 0.0907                                                                                     |
| R indices (all data)                                                                          | R1 = 0.1373, *wR2 = 0.1088                                                                                     |
| *Report these R factors.                                                                      |                                                                                                                |
| R1 = sum  Fo - Fc  /sum Fo , wR2= root(sum(w*D*D)/sum(w*Fo*Fo)),<br>where D = (Fo*Fo - Fc*Fc) |                                                                                                                |
| Weighting scheme                                                                              | calc w=1/[\s^2^(Fo^2^)+(0.0110P)^2^+0.0000P]                                                                   |
| where P=(Fo^2^+2Fc^2^)/3                                                                      |                                                                                                                |
| Largest diff. peak and hole                                                                   | 0.695 and -0.467 e.Å <sup>-3</sup>                                                                             |

**Table S-40.** Atomic coordinates ( $\times 10^4$ ) and equivalent isotropic displacement parameters ( $\text{\AA}^2 \times 10^3$ ) for  $(\text{Me}_4\text{N})_2[\text{Fe}^{\text{III}}(\text{tame}-\text{N}_2\text{S})\text{S}_2^{\text{Me}_2}]\cdot 2\text{H}_2\text{O}$  (**15a**).  $U(\text{eq})$  is defined as one third of the trace of the orthogonalized  $U_{ij}$  tensor.

|       | x       | y        | z       | $U(\text{eq})$ |
|-------|---------|----------|---------|----------------|
| C(1)  | 4948(3) | 5705(6)  | 1041(2) | 40(2)          |
| C(2)  | 4189(3) | 5985(6)  | 260(2)  | 37(2)          |
| C(3)  | 4173(3) | 5748(5)  | 763(2)  | 25(2)          |
| C(4)  | 3773(3) | 6783(7)  | 946(2)  | 27(2)          |
| C(5)  | 2935(3) | 7531(5)  | 1371(2) | 27(2)          |
| C(6)  | 2372(3) | 7171(6)  | 1638(2) | 24(2)          |
| C(7)  | 1738(3) | 6499(6)  | 1330(2) | 27(2)          |
| C(8)  | 2664(3) | 6402(6)  | 2072(2) | 30(2)          |
| C(9)  | 2061(3) | 8380(6)  | 1793(2) | 36(2)          |
| C(10) | 1400(4) | 4384(6)  | 1245(2) | 25(2)          |
| C(11) | 1630(3) | 3032(6)  | 1263(2) | 27(2)          |
| C(12) | 1690(3) | 2595(6)  | 1756(2) | 37(2)          |
| C(13) | 1060(3) | 2264(6)  | 939(2)  | 33(2)          |
| C(14) | 735(3)  | 2136(6)  | 4868(2) | 35(2)          |
| C(15) | -33(3)  | 1992(6)  | 4076(2) | 30(2)          |
| C(16) | 735(3)  | 1935(6)  | 4363(2) | 24(2)          |
| C(17) | 1156(3) | 2967(6)  | 4187(2) | 23(2)          |
| C(18) | 1885(3) | 3683(6)  | 3699(2) | 29(2)          |
| C(19) | 2372(3) | 3294(6)  | 3364(2) | 19(2)          |
| C(20) | 1961(3) | 2600(6)  | 2942(2) | 31(2)          |
| C(21) | 3015(3) | 2552(6)  | 3611(2) | 27(2)          |
| C(22) | 2670(3) | 4489(5)  | 3196(2) | 32(2)          |
| C(23) | 3236(3) | 398(6)   | 3565(2) | 22(2)          |
| C(24) | 2995(3) | -925(6)  | 3598(2) | 22(2)          |
| C(25) | 2791(3) | -1407(6) | 3097(2) | 34(2)          |
| C(26) | 3597(3) | -1728(6) | 3873(2) | 38(2)          |
| C(27) | 3733(5) | -378(9)  | -59(3)  | 105(4)         |
| C(28) | 3160(4) | 1707(7)  | -48(2)  | 60(2)          |
| C(29) | 3983(4) | 935(7)   | 634(2)  | 70(3)          |
| C(30) | 2816(4) | 82(8)    | 370(3)  | 93(3)          |
| C(31) | 5070(3) | 1053(6)  | 2541(2) | 34(2)          |
| C(32) | 4607(3) | 2554(6)  | 1941(2) | 41(2)          |
| C(33) | 4300(3) | 2701(6)  | 2701(2) | 43(2)          |
| C(34) | 3793(3) | 1041(6)  | 2165(2) | 49(2)          |
| C(35) | 2816(3) | 1181(6)  | 5334(2) | 37(2)          |
| C(36) | 3681(3) | 923(6)   | 4827(2) | 41(2)          |
| C(37) | 4027(3) | 2102(6)  | 5535(2) | 35(2)          |



|       |         |          |         |        |
|-------|---------|----------|---------|--------|
| C(38) | 3121(4) | 2949(6)  | 4905(2) | 44(2)  |
| C(39) | 841(3)  | 7213(6)  | 2872(2) | 40(2)  |
| C(40) | 273(3)  | 8834(5)  | 2359(2) | 29(2)  |
| C(41) | 124(4)  | 8779(6)  | 3154(2) | 50(2)  |
| C(42) | -462(3) | 7244(6)  | 2612(2) | 29(2)  |
| N(1)  | 3208(2) | 6489(4)  | 1133(2) | 18(1)  |
| N(2)  | 1919(2) | 5222(5)  | 1245(2) | 25(1)  |
| N(3)  | 1642(2) | 2645(4)  | 3939(2) | 22(1)  |
| N(4)  | 2815(2) | 1262(5)  | 3699(2) | 22(1)  |
| N(5)  | 3450(3) | 630(5)   | 211(2)  | 32(2)  |
| N(6)  | 4437(3) | 1833(5)  | 2336(2) | 25(1)  |
| N(7)  | 3413(3) | 1804(5)  | 5148(2) | 23(1)  |
| N(8)  | 185(3)  | 8019(5)  | 2748(2) | 25(1)  |
| O(1)  | 4008(2) | 7878(4)  | 932(1)  | 30(1)  |
| O(2)  | 753(2)  | 4616(4)  | 1257(2) | 42(1)  |
| O(3)  | 1000(2) | 4062(4)  | 4259(1) | 27(1)  |
| O(4)  | 3795(2) | 595(4)   | 3417(1) | 32(1)  |
| O(5)  | 4885(3) | 8989(5)  | 1690(1) | 47(1)  |
| O(6)  | 140(2)  | 5420(4)  | 3558(2) | 37(1)  |
| O(7)  | 183(4)  | 6318(7)  | 546(2)  | 108(2) |
| S(1)  | 3733(1) | 4281(2)  | 819(1)  | 32(1)  |
| S(2)  | 2517(1) | 2892(2)  | 1109(1) | 28(1)  |
| S(3)  | 3302(1) | 5145(2)  | 2037(1) | 28(1)  |
| S(4)  | 1125(1) | 445(2)   | 4279(1) | 29(1)  |
| S(5)  | 2196(1) | -1010(2) | 3854(1) | 28(1)  |
| S(6)  | 1328(1) | 1362(2)  | 3008(1) | 29(1)  |
| Fe(1) | 2924(1) | 4796(1)  | 1228(1) | 23(1)  |
| Fe(2) | 1840(1) | 937(1)   | 3797(1) | 23(1)  |

---

**Table S-41.** Bond lengths [Å] and angles [deg] for  $(\text{Me}_4\text{N})_2[\text{Fe}^{\text{III}}(\text{tame-}\text{N}_2\text{S})\text{S}_2^{\text{Me}_2}]\cdot 3\text{H}_2\text{O}$ . (**15a**)

---

|              |          |
|--------------|----------|
| C(1)-C(3)    | 1.528(8) |
| C(1)-H(1A)   | 0.9800   |
| C(1)-H(1B)   | 0.9800   |
| C(1)-H(1C)   | 0.9800   |
| C(2)-C(3)    | 1.525(8) |
| C(2)-H(2A)   | 0.9800   |
| C(2)-H(2B)   | 0.9800   |
| C(2)-H(2C)   | 0.9800   |
| C(3)-C(4)    | 1.517(8) |
| C(3)-S(1)    | 1.821(6) |
| C(4)-O(1)    | 1.273(7) |
| C(4)-N(1)    | 1.341(7) |
| C(5)-N(1)    | 1.482(6) |
| C(5)-C(6)    | 1.504(7) |
| C(5)-H(5A)   | 0.9900   |
| C(5)-H(5B)   | 0.9900   |
| C(6)-C(7)    | 1.535(7) |
| C(6)-C(8)    | 1.544(8) |
| C(6)-C(9)    | 1.547(7) |
| C(7)-N(2)    | 1.464(7) |
| C(7)-H(7A)   | 0.9900   |
| C(7)-H(7B)   | 0.9900   |
| C(8)-S(3)    | 1.838(6) |
| C(8)-H(8A)   | 0.9900   |
| C(8)-H(8B)   | 0.9900   |
| C(9)-H(9A)   | 0.9800   |
| C(9)-H(9B)   | 0.9800   |
| C(9)-H(9C)   | 0.9800   |
| C(10)-O(2)   | 1.254(6) |
| C(10)-N(2)   | 1.338(7) |
| C(10)-C(11)  | 1.530(8) |
| C(11)-C(12)  | 1.524(7) |
| C(11)-C(13)  | 1.536(7) |
| C(11)-S(2)   | 1.834(6) |
| C(12)-H(12A) | 0.9800   |
| C(12)-H(12B) | 0.9800   |
| C(12)-H(12C) | 0.9800   |
| C(13)-H(13A) | 0.9800   |
| C(13)-H(13B) | 0.9800   |
| C(13)-H(13C) | 0.9800   |
| C(14)-C(16)  | 1.519(7) |
| C(14)-H(14A) | 0.9800   |
| C(14)-H(14B) | 0.9800   |

|              |          |
|--------------|----------|
| C(14)-H(14C) | 0.9800   |
| C(15)-C(16)  | 1.525(7) |
| C(15)-H(15A) | 0.9800   |
| C(15)-H(15B) | 0.9800   |
| C(15)-H(15C) | 0.9800   |
| C(16)-C(17)  | 1.529(8) |
| C(16)-S(4)   | 1.816(6) |
| C(17)-O(3)   | 1.254(7) |
| C(17)-N(3)   | 1.337(7) |
| C(18)-N(3)   | 1.459(6) |
| C(18)-C(19)  | 1.548(7) |
| C(18)-H(18A) | 0.9900   |
| C(18)-H(18B) | 0.9900   |
| C(19)-C(21)  | 1.515(7) |
| C(19)-C(20)  | 1.533(7) |
| C(19)-C(22)  | 1.538(7) |
| C(20)-S(6)   | 1.837(6) |
| C(20)-H(20A) | 0.9900   |
| C(20)-H(20B) | 0.9900   |
| C(21)-N(4)   | 1.489(7) |
| C(21)-H(21A) | 0.9900   |
| C(21)-H(21B) | 0.9900   |
| C(22)-H(22A) | 0.9800   |
| C(22)-H(22B) | 0.9800   |
| C(22)-H(22C) | 0.9800   |
| C(23)-O(4)   | 1.245(6) |
| C(23)-N(4)   | 1.342(7) |
| C(23)-C(24)  | 1.516(8) |
| C(24)-C(26)  | 1.529(7) |
| C(24)-C(25)  | 1.553(7) |
| C(24)-S(5)   | 1.828(5) |
| C(25)-H(25A) | 0.9800   |
| C(25)-H(25B) | 0.9800   |
| C(25)-H(25C) | 0.9800   |
| C(26)-H(26A) | 0.9800   |
| C(26)-H(26B) | 0.9800   |
| C(26)-H(26C) | 0.9800   |
| C(27)-N(5)   | 1.518(8) |
| C(27)-H(27A) | 0.9800   |
| C(27)-H(27B) | 0.9800   |
| C(27)-H(27C) | 0.9800   |
| C(28)-N(5)   | 1.445(7) |
| C(28)-H(28A) | 0.9800   |
| C(28)-H(28B) | 0.9800   |
| C(28)-H(28C) | 0.9800   |
| C(29)-N(5)   | 1.480(7) |
| C(29)-H(29A) | 0.9800   |
| C(29)-H(29B) | 0.9800   |

|              |          |
|--------------|----------|
| C(29)-H(29C) | 0.9800   |
| C(30)-N(5)   | 1.499(8) |
| C(30)-H(30A) | 0.9800   |
| C(30)-H(30B) | 0.9800   |
| C(30)-H(30C) | 0.9800   |
| C(31)-N(6)   | 1.489(7) |
| C(31)-H(31A) | 0.9800   |
| C(31)-H(31B) | 0.9800   |
| C(31)-H(31C) | 0.9800   |
| C(32)-N(6)   | 1.502(7) |
| C(32)-H(32A) | 0.9800   |
| C(32)-H(32B) | 0.9800   |
| C(32)-H(32C) | 0.9800   |
| C(33)-N(6)   | 1.499(7) |
| C(33)-H(33A) | 0.9800   |
| C(33)-H(33B) | 0.9800   |
| C(33)-H(33C) | 0.9800   |
| C(34)-N(6)   | 1.492(7) |
| C(34)-H(34A) | 0.9800   |
| C(34)-H(34B) | 0.9800   |
| C(34)-H(34C) | 0.9800   |
| C(35)-N(7)   | 1.514(6) |
| C(35)-H(35A) | 0.9800   |
| C(35)-H(35B) | 0.9800   |
| C(35)-H(35C) | 0.9800   |
| C(36)-N(7)   | 1.511(6) |
| C(36)-H(36A) | 0.9800   |
| C(36)-H(36B) | 0.9800   |
| C(36)-H(36C) | 0.9800   |
| C(37)-N(7)   | 1.493(6) |
| C(37)-H(37A) | 0.9800   |
| C(37)-H(37B) | 0.9800   |
| C(37)-H(37C) | 0.9800   |
| C(38)-N(7)   | 1.486(7) |
| C(38)-H(38A) | 0.9800   |
| C(38)-H(38B) | 0.9800   |
| C(38)-H(38C) | 0.9800   |
| C(39)-N(8)   | 1.499(7) |
| C(39)-H(39A) | 0.9800   |
| C(39)-H(39B) | 0.9800   |
| C(39)-H(39C) | 0.9800   |
| C(40)-N(8)   | 1.494(6) |
| C(40)-H(40A) | 0.9800   |
| C(40)-H(40B) | 0.9800   |
| C(40)-H(40C) | 0.9800   |
| C(41)-N(8)   | 1.487(7) |
| C(41)-H(41A) | 0.9800   |
| C(41)-H(41B) | 0.9800   |

|                  |            |
|------------------|------------|
| C(41)-H(41C)     | 0.9800     |
| C(42)-N(8)       | 1.471(6)   |
| C(42)-H(42A)     | 0.9800     |
| C(42)-H(42B)     | 0.9800     |
| C(42)-H(42C)     | 0.9800     |
| N(1)-Fe(1)       | 1.952(5)   |
| N(2)-Fe(1)       | 1.964(4)   |
| N(3)-Fe(2)       | 1.956(5)   |
| N(4)-Fe(2)       | 1.956(5)   |
| O(5)-H(51)       | 0.800(5)   |
| O(5)-H(52)       | 0.799(5)   |
| O(6)-H(61)       | 0.800(5)   |
| O(6)-H(62)       | 0.800(5)   |
| O(7)-H(71)       | 0.802(5)   |
| O(7)-H(72)       | 0.803(5)   |
| S(1)-Fe(1)       | 2.2122(15) |
| S(2)-Fe(1)       | 2.2085(19) |
| S(3)-Fe(1)       | 2.3980(17) |
| S(4)-Fe(2)       | 2.2284(15) |
| S(5)-Fe(2)       | 2.2141(19) |
| S(6)-Fe(2)       | 2.3931(18) |
| C(3)-C(1)-H(1A)  | 109.5      |
| C(3)-C(1)-H(1B)  | 109.5      |
| H(1A)-C(1)-H(1B) | 109.5      |
| C(3)-C(1)-H(1C)  | 109.5      |
| H(1A)-C(1)-H(1C) | 109.5      |
| H(1B)-C(1)-H(1C) | 109.5      |
| C(3)-C(2)-H(2A)  | 109.5      |
| C(3)-C(2)-H(2B)  | 109.5      |
| H(2A)-C(2)-H(2B) | 109.5      |
| C(3)-C(2)-H(2C)  | 109.5      |
| H(2A)-C(2)-H(2C) | 109.5      |
| H(2B)-C(2)-H(2C) | 109.5      |
| C(4)-C(3)-C(2)   | 109.9(5)   |
| C(4)-C(3)-C(1)   | 108.7(5)   |
| C(2)-C(3)-C(1)   | 109.1(5)   |
| C(4)-C(3)-S(1)   | 110.2(4)   |
| C(2)-C(3)-S(1)   | 109.9(4)   |
| C(1)-C(3)-S(1)   | 109.1(4)   |
| O(1)-C(4)-N(1)   | 123.2(6)   |
| O(1)-C(4)-C(3)   | 118.6(6)   |
| N(1)-C(4)-C(3)   | 118.1(6)   |
| N(1)-C(5)-C(6)   | 114.0(5)   |
| N(1)-C(5)-H(5A)  | 108.7      |
| C(6)-C(5)-H(5A)  | 108.7      |
| N(1)-C(5)-H(5B)  | 108.7      |
| C(6)-C(5)-H(5B)  | 108.7      |
| H(5A)-C(5)-H(5B) | 107.6      |

|                     |          |
|---------------------|----------|
| C(5)-C(6)-C(7)      | 111.0(5) |
| C(5)-C(6)-C(8)      | 114.4(5) |
| C(7)-C(6)-C(8)      | 110.1(5) |
| C(5)-C(6)-C(9)      | 106.9(5) |
| C(7)-C(6)-C(9)      | 106.5(5) |
| C(8)-C(6)-C(9)      | 107.6(5) |
| N(2)-C(7)-C(6)      | 111.9(5) |
| N(2)-C(7)-H(7A)     | 109.2    |
| C(6)-C(7)-H(7A)     | 109.2    |
| N(2)-C(7)-H(7B)     | 109.2    |
| C(6)-C(7)-H(7B)     | 109.2    |
| H(7A)-C(7)-H(7B)    | 107.9    |
| C(6)-C(8)-S(3)      | 118.6(4) |
| C(6)-C(8)-H(8A)     | 107.7    |
| S(3)-C(8)-H(8A)     | 107.7    |
| C(6)-C(8)-H(8B)     | 107.7    |
| S(3)-C(8)-H(8B)     | 107.7    |
| H(8A)-C(8)-H(8B)    | 107.1    |
| C(6)-C(9)-H(9A)     | 109.5    |
| C(6)-C(9)-H(9B)     | 109.5    |
| H(9A)-C(9)-H(9B)    | 109.5    |
| C(6)-C(9)-H(9C)     | 109.5    |
| H(9A)-C(9)-H(9C)    | 109.5    |
| H(9B)-C(9)-H(9C)    | 109.5    |
| O(2)-C(10)-N(2)     | 125.6(6) |
| O(2)-C(10)-C(11)    | 117.6(6) |
| N(2)-C(10)-C(11)    | 116.7(6) |
| C(12)-C(11)-C(10)   | 107.3(5) |
| C(12)-C(11)-C(13)   | 109.9(5) |
| C(10)-C(11)-C(13)   | 110.0(5) |
| C(12)-C(11)-S(2)    | 109.0(4) |
| C(10)-C(11)-S(2)    | 109.8(4) |
| C(13)-C(11)-S(2)    | 110.8(4) |
| C(11)-C(12)-H(12A)  | 109.5    |
| C(11)-C(12)-H(12B)  | 109.5    |
| H(12A)-C(12)-H(12B) | 109.5    |
| C(11)-C(12)-H(12C)  | 109.5    |
| H(12A)-C(12)-H(12C) | 109.5    |
| H(12B)-C(12)-H(12C) | 109.5    |
| C(11)-C(13)-H(13A)  | 109.5    |
| C(11)-C(13)-H(13B)  | 109.5    |
| H(13A)-C(13)-H(13B) | 109.5    |
| C(11)-C(13)-H(13C)  | 109.5    |
| H(13A)-C(13)-H(13C) | 109.5    |
| H(13B)-C(13)-H(13C) | 109.5    |
| C(16)-C(14)-H(14A)  | 109.5    |
| C(16)-C(14)-H(14B)  | 109.5    |
| H(14A)-C(14)-H(14B) | 109.5    |

|                     |          |
|---------------------|----------|
| C(16)-C(14)-H(14C)  | 109.5    |
| H(14A)-C(14)-H(14C) | 109.5    |
| H(14B)-C(14)-H(14C) | 109.5    |
| C(16)-C(15)-H(15A)  | 109.5    |
| C(16)-C(15)-H(15B)  | 109.5    |
| H(15A)-C(15)-H(15B) | 109.5    |
| C(16)-C(15)-H(15C)  | 109.5    |
| H(15A)-C(15)-H(15C) | 109.5    |
| H(15B)-C(15)-H(15C) | 109.5    |
| C(14)-C(16)-C(15)   | 110.8(5) |
| C(14)-C(16)-C(17)   | 109.8(5) |
| C(15)-C(16)-C(17)   | 106.2(5) |
| C(14)-C(16)-S(4)    | 110.3(4) |
| C(15)-C(16)-S(4)    | 109.0(4) |
| C(17)-C(16)-S(4)    | 110.6(4) |
| O(3)-C(17)-N(3)     | 123.7(6) |
| O(3)-C(17)-C(16)    | 118.7(5) |
| N(3)-C(17)-C(16)    | 117.5(6) |
| N(3)-C(18)-C(19)    | 113.2(5) |
| N(3)-C(18)-H(18A)   | 108.9    |
| C(19)-C(18)-H(18A)  | 108.9    |
| N(3)-C(18)-H(18B)   | 108.9    |
| C(19)-C(18)-H(18B)  | 108.9    |
| H(18A)-C(18)-H(18B) | 107.8    |
| C(21)-C(19)-C(20)   | 110.9(5) |
| C(21)-C(19)-C(22)   | 107.2(5) |
| C(20)-C(19)-C(22)   | 107.8(5) |
| C(21)-C(19)-C(18)   | 110.8(5) |
| C(20)-C(19)-C(18)   | 113.2(5) |
| C(22)-C(19)-C(18)   | 106.5(5) |
| C(19)-C(20)-S(6)    | 120.2(4) |
| C(19)-C(20)-H(20A)  | 107.3    |
| S(6)-C(20)-H(20A)   | 107.3    |
| C(19)-C(20)-H(20B)  | 107.3    |
| S(6)-C(20)-H(20B)   | 107.3    |
| H(20A)-C(20)-H(20B) | 106.9    |
| N(4)-C(21)-C(19)    | 112.3(5) |
| N(4)-C(21)-H(21A)   | 109.1    |
| C(19)-C(21)-H(21A)  | 109.1    |
| N(4)-C(21)-H(21B)   | 109.1    |
| C(19)-C(21)-H(21B)  | 109.1    |
| H(21A)-C(21)-H(21B) | 107.9    |
| C(19)-C(22)-H(22A)  | 109.5    |
| C(19)-C(22)-H(22B)  | 109.5    |
| H(22A)-C(22)-H(22B) | 109.5    |
| C(19)-C(22)-H(22C)  | 109.5    |
| H(22A)-C(22)-H(22C) | 109.5    |
| H(22B)-C(22)-H(22C) | 109.5    |

|                     |          |
|---------------------|----------|
| O(4)-C(23)-N(4)     | 125.6(6) |
| O(4)-C(23)-C(24)    | 118.2(6) |
| N(4)-C(23)-C(24)    | 116.2(5) |
| C(23)-C(24)-C(26)   | 112.0(5) |
| C(23)-C(24)-C(25)   | 106.1(5) |
| C(26)-C(24)-C(25)   | 109.4(5) |
| C(23)-C(24)-S(5)    | 111.0(4) |
| C(26)-C(24)-S(5)    | 109.6(4) |
| C(25)-C(24)-S(5)    | 108.6(4) |
| C(24)-C(25)-H(25A)  | 109.5    |
| C(24)-C(25)-H(25B)  | 109.5    |
| H(25A)-C(25)-H(25B) | 109.5    |
| C(24)-C(25)-H(25C)  | 109.5    |
| H(25A)-C(25)-H(25C) | 109.5    |
| H(25B)-C(25)-H(25C) | 109.5    |
| C(24)-C(26)-H(26A)  | 109.5    |
| C(24)-C(26)-H(26B)  | 109.5    |
| H(26A)-C(26)-H(26B) | 109.5    |
| C(24)-C(26)-H(26C)  | 109.5    |
| H(26A)-C(26)-H(26C) | 109.5    |
| H(26B)-C(26)-H(26C) | 109.5    |
| N(5)-C(27)-H(27A)   | 109.5    |
| N(5)-C(27)-H(27B)   | 109.5    |
| H(27A)-C(27)-H(27B) | 109.5    |
| N(5)-C(27)-H(27C)   | 109.5    |
| H(27A)-C(27)-H(27C) | 109.5    |
| H(27B)-C(27)-H(27C) | 109.5    |
| N(5)-C(28)-H(28A)   | 109.5    |
| N(5)-C(28)-H(28B)   | 109.5    |
| H(28A)-C(28)-H(28B) | 109.5    |
| N(5)-C(28)-H(28C)   | 109.5    |
| H(28A)-C(28)-H(28C) | 109.5    |
| H(28B)-C(28)-H(28C) | 109.5    |
| N(5)-C(29)-H(29A)   | 109.5    |
| N(5)-C(29)-H(29B)   | 109.5    |
| H(29A)-C(29)-H(29B) | 109.5    |
| N(5)-C(29)-H(29C)   | 109.5    |
| H(29A)-C(29)-H(29C) | 109.5    |
| H(29B)-C(29)-H(29C) | 109.5    |
| N(5)-C(30)-H(30A)   | 109.5    |
| N(5)-C(30)-H(30B)   | 109.5    |
| H(30A)-C(30)-H(30B) | 109.5    |
| N(5)-C(30)-H(30C)   | 109.5    |
| H(30A)-C(30)-H(30C) | 109.5    |
| H(30B)-C(30)-H(30C) | 109.5    |
| N(6)-C(31)-H(31A)   | 109.5    |
| N(6)-C(31)-H(31B)   | 109.5    |
| H(31A)-C(31)-H(31B) | 109.5    |



|                     |       |
|---------------------|-------|
| N(6)-C(31)-H(31C)   | 109.5 |
| H(31A)-C(31)-H(31C) | 109.5 |
| H(31B)-C(31)-H(31C) | 109.5 |
| N(6)-C(32)-H(32A)   | 109.5 |
| N(6)-C(32)-H(32B)   | 109.5 |
| H(32A)-C(32)-H(32B) | 109.5 |
| N(6)-C(32)-H(32C)   | 109.5 |
| H(32A)-C(32)-H(32C) | 109.5 |
| H(32B)-C(32)-H(32C) | 109.5 |
| N(6)-C(33)-H(33A)   | 109.5 |
| N(6)-C(33)-H(33B)   | 109.5 |
| H(33A)-C(33)-H(33B) | 109.5 |
| N(6)-C(33)-H(33C)   | 109.5 |
| H(33A)-C(33)-H(33C) | 109.5 |
| H(33B)-C(33)-H(33C) | 109.5 |
| N(6)-C(34)-H(34A)   | 109.5 |
| N(6)-C(34)-H(34B)   | 109.5 |
| H(34A)-C(34)-H(34B) | 109.5 |
| N(6)-C(34)-H(34C)   | 109.5 |
| H(34A)-C(34)-H(34C) | 109.5 |
| H(34B)-C(34)-H(34C) | 109.5 |
| N(7)-C(35)-H(35A)   | 109.5 |
| N(7)-C(35)-H(35B)   | 109.5 |
| H(35A)-C(35)-H(35B) | 109.5 |
| N(7)-C(35)-H(35C)   | 109.5 |
| H(35A)-C(35)-H(35C) | 109.5 |
| H(35B)-C(35)-H(35C) | 109.5 |
| N(7)-C(36)-H(36A)   | 109.5 |
| N(7)-C(36)-H(36B)   | 109.5 |
| H(36A)-C(36)-H(36B) | 109.5 |
| N(7)-C(36)-H(36C)   | 109.5 |
| H(36A)-C(36)-H(36C) | 109.5 |
| H(36B)-C(36)-H(36C) | 109.5 |
| N(7)-C(37)-H(37A)   | 109.5 |
| N(7)-C(37)-H(37B)   | 109.5 |
| H(37A)-C(37)-H(37B) | 109.5 |
| N(7)-C(37)-H(37C)   | 109.5 |
| H(37A)-C(37)-H(37C) | 109.5 |
| H(37B)-C(37)-H(37C) | 109.5 |
| N(7)-C(38)-H(38A)   | 109.5 |
| N(7)-C(38)-H(38B)   | 109.5 |
| H(38A)-C(38)-H(38B) | 109.5 |
| N(7)-C(38)-H(38C)   | 109.5 |
| H(38A)-C(38)-H(38C) | 109.5 |
| H(38B)-C(38)-H(38C) | 109.5 |
| N(8)-C(39)-H(39A)   | 109.5 |
| N(8)-C(39)-H(39B)   | 109.5 |
| H(39A)-C(39)-H(39B) | 109.5 |

|                     |          |
|---------------------|----------|
| N(8)-C(39)-H(39C)   | 109.5    |
| H(39A)-C(39)-H(39C) | 109.5    |
| H(39B)-C(39)-H(39C) | 109.5    |
| N(8)-C(40)-H(40A)   | 109.5    |
| N(8)-C(40)-H(40B)   | 109.5    |
| H(40A)-C(40)-H(40B) | 109.5    |
| N(8)-C(40)-H(40C)   | 109.5    |
| H(40A)-C(40)-H(40C) | 109.5    |
| H(40B)-C(40)-H(40C) | 109.5    |
| N(8)-C(41)-H(41A)   | 109.5    |
| N(8)-C(41)-H(41B)   | 109.5    |
| H(41A)-C(41)-H(41B) | 109.5    |
| N(8)-C(41)-H(41C)   | 109.5    |
| H(41A)-C(41)-H(41C) | 109.5    |
| H(41B)-C(41)-H(41C) | 109.5    |
| N(8)-C(42)-H(42A)   | 109.5    |
| N(8)-C(42)-H(42B)   | 109.5    |
| H(42A)-C(42)-H(42B) | 109.5    |
| N(8)-C(42)-H(42C)   | 109.5    |
| H(42A)-C(42)-H(42C) | 109.5    |
| H(42B)-C(42)-H(42C) | 109.5    |
| C(4)-N(1)-C(5)      | 113.7(5) |
| C(4)-N(1)-Fe(1)     | 123.3(4) |
| C(5)-N(1)-Fe(1)     | 121.2(3) |
| C(10)-N(2)-C(7)     | 116.5(5) |
| C(10)-N(2)-Fe(1)    | 123.5(4) |
| C(7)-N(2)-Fe(1)     | 119.3(4) |
| C(17)-N(3)-C(18)    | 112.9(5) |
| C(17)-N(3)-Fe(2)    | 123.4(4) |
| C(18)-N(3)-Fe(2)    | 122.2(3) |
| C(23)-N(4)-C(21)    | 114.8(5) |
| C(23)-N(4)-Fe(2)    | 123.4(4) |
| C(21)-N(4)-Fe(2)    | 118.5(4) |
| C(28)-N(5)-C(29)    | 112.9(6) |
| C(28)-N(5)-C(30)    | 104.5(5) |
| C(29)-N(5)-C(30)    | 105.5(5) |
| C(28)-N(5)-C(27)    | 116.0(5) |
| C(29)-N(5)-C(27)    | 111.1(6) |
| C(30)-N(5)-C(27)    | 105.8(6) |
| C(31)-N(6)-C(34)    | 109.9(5) |
| C(31)-N(6)-C(33)    | 107.8(5) |
| C(34)-N(6)-C(33)    | 111.1(5) |
| C(31)-N(6)-C(32)    | 109.5(4) |
| C(34)-N(6)-C(32)    | 108.9(5) |
| C(33)-N(6)-C(32)    | 109.6(5) |
| C(38)-N(7)-C(37)    | 110.2(5) |
| C(38)-N(7)-C(36)    | 111.2(4) |
| C(37)-N(7)-C(36)    | 108.5(4) |

|                  |            |
|------------------|------------|
| C(38)-N(7)-C(35) | 108.8(4)   |
| C(37)-N(7)-C(35) | 109.4(4)   |
| C(36)-N(7)-C(35) | 108.7(5)   |
| C(42)-N(8)-C(41) | 110.0(4)   |
| C(42)-N(8)-C(40) | 110.1(4)   |
| C(41)-N(8)-C(40) | 109.9(5)   |
| C(42)-N(8)-C(39) | 109.3(5)   |
| C(41)-N(8)-C(39) | 108.9(5)   |
| C(40)-N(8)-C(39) | 108.6(4)   |
| H(51)-O(5)-H(52) | 105.3(9)   |
| H(61)-O(6)-H(62) | 105.1(9)   |
| H(71)-O(7)-H(72) | 104.8(9)   |
| C(3)-S(1)-Fe(1)  | 102.09(19) |
| C(11)-S(2)-Fe(1) | 100.8(2)   |
| C(8)-S(3)-Fe(1)  | 96.45(19)  |
| C(16)-S(4)-Fe(2) | 101.04(18) |
| C(24)-S(5)-Fe(2) | 100.6(2)   |
| C(20)-S(6)-Fe(2) | 96.1(2)    |
| N(1)-Fe(1)-N(2)  | 94.4(2)    |
| N(1)-Fe(1)-S(2)  | 162.90(14) |
| N(2)-Fe(1)-S(2)  | 85.33(17)  |
| N(1)-Fe(1)-S(1)  | 85.30(14)  |
| N(2)-Fe(1)-S(1)  | 148.72(14) |
| S(2)-Fe(1)-S(1)  | 86.12(6)   |
| N(1)-Fe(1)-S(3)  | 87.79(14)  |
| N(2)-Fe(1)-S(3)  | 91.50(14)  |
| S(2)-Fe(1)-S(3)  | 109.32(7)  |
| S(1)-Fe(1)-S(3)  | 119.69(7)  |
| N(4)-Fe(2)-N(3)  | 95.1(2)    |
| N(4)-Fe(2)-S(5)  | 84.46(16)  |
| N(3)-Fe(2)-S(5)  | 163.26(14) |
| N(4)-Fe(2)-S(4)  | 148.53(14) |
| N(3)-Fe(2)-S(4)  | 85.41(14)  |
| S(5)-Fe(2)-S(4)  | 86.35(6)   |
| N(4)-Fe(2)-S(6)  | 91.27(14)  |
| N(3)-Fe(2)-S(6)  | 88.41(14)  |
| S(5)-Fe(2)-S(6)  | 108.32(7)  |
| S(4)-Fe(2)-S(6)  | 120.17(7)  |

---

Symmetry transformations used to generate equivalent atoms:

**Table S-42.** Anisotropic displacement parameters ( $\text{Å}^2 \times 10^3$ ) for  $(\text{Me}_4\text{N})_2[\text{Fe}^{\text{III}}(\text{tame}-\text{N}_2\text{S})\text{S}_2^{\text{Me}_2}]\cdot 3\text{H}_2\text{O}$  (**15a**). The anisotropic displacement factor exponent takes the form:  $-2 \pi^2 [ h^2 a^{*2} U_{11} + \dots + 2 h k a^* b^* U_{12} ]$

|       | U11    | U22     | U33    | U23    | U13    | U12    |
|-------|--------|---------|--------|--------|--------|--------|
| C(1)  | 24(4)  | 38(5)   | 58(5)  | -14(4) | 8(4)   | -13(4) |
| C(2)  | 41(4)  | 35(5)   | 38(4)  | 2(4)   | 18(4)  | 2(4)   |
| C(3)  | 29(4)  | 21(5)   | 27(4)  | -6(3)  | 8(4)   | -2(3)  |
| C(4)  | 26(4)  | 26(5)   | 22(4)  | 9(4)   | -11(3) | 12(4)  |
| C(5)  | 33(4)  | 18(4)   | 32(4)  | -1(3)  | 15(4)  | 6(4)   |
| C(6)  | 29(4)  | 18(4)   | 21(4)  | -6(3)  | -4(3)  | 9(3)   |
| C(7)  | 25(4)  | 20(5)   | 36(4)  | -9(4)  | 6(3)   | 6(4)   |
| C(8)  | 28(4)  | 30(5)   | 33(4)  | -15(4) | 7(3)   | -5(4)  |
| C(9)  | 26(4)  | 45(5)   | 37(4)  | -21(4) | 3(4)   | 3(4)   |
| C(10) | 27(5)  | 26(5)   | 19(4)  | -4(3)  | 1(3)   | 10(4)  |
| C(11) | 33(4)  | 16(4)   | 32(4)  | 0(3)   | 8(3)   | -4(4)  |
| C(12) | 37(4)  | 52(6)   | 27(4)  | 4(4)   | 16(4)  | -1(4)  |
| C(13) | 35(4)  | 22(5)   | 43(4)  | -16(4) | 9(4)   | -6(4)  |
| C(14) | 42(4)  | 23(5)   | 45(5)  | -7(4)  | 20(4)  | 3(4)   |
| C(15) | 22(4)  | 25(5)   | 44(4)  | 5(3)   | 10(4)  | 2(3)   |
| C(16) | 23(4)  | 29(5)   | 20(4)  | 4(3)   | 3(3)   | 0(4)   |
| C(17) | 23(4)  | 20(5)   | 27(4)  | 3(4)   | 7(4)   | 1(4)   |
| C(18) | 35(4)  | 17(4)   | 35(4)  | 2(3)   | 9(4)   | 16(4)  |
| C(19) | 18(4)  | 22(4)   | 20(4)  | 3(3)   | 11(3)  | -2(3)  |
| C(20) | 33(4)  | 30(5)   | 30(4)  | 8(4)   | 9(3)   | 1(4)   |
| C(21) | 29(4)  | 25(5)   | 29(4)  | -5(3)  | 14(3)  | -1(4)  |
| C(22) | 45(4)  | 27(5)   | 30(4)  | 5(3)   | 21(4)  | 2(4)   |
| C(23) | 14(4)  | 25(5)   | 26(4)  | 7(3)   | -1(3)  | 2(4)   |
| C(24) | 15(4)  | 23(5)   | 29(4)  | -5(3)  | 8(3)   | -3(3)  |
| C(25) | 37(4)  | 37(5)   | 29(4)  | -12(4) | 13(4)  | -5(4)  |
| C(26) | 39(5)  | 29(5)   | 47(5)  | 10(4)  | 10(4)  | 9(4)   |
| C(27) | 118(8) | 128(10) | 56(6)  | -25(6) | -16(6) | 65(7)  |
| C(28) | 88(6)  | 41(6)   | 34(5)  | 13(4)  | -26(4) | -13(5) |
| C(29) | 102(7) | 41(6)   | 45(5)  | 7(4)   | -34(5) | 1(5)   |
| C(30) | 101(8) | 73(8)   | 100(7) | 43(6)  | 6(6)   | 12(6)  |
| C(31) | 40(4)  | 19(4)   | 39(4)  | -5(4)  | -3(4)  | 13(4)  |
| C(32) | 47(5)  | 46(5)   | 33(4)  | 18(4)  | 17(4)  | 10(4)  |
| C(33) | 51(5)  | 48(6)   | 33(4)  | 8(4)   | 15(4)  | 9(4)   |
| C(34) | 29(4)  | 55(6)   | 58(5)  | 6(4)   | 1(4)   | -7(4)  |
| C(35) | 27(4)  | 30(5)   | 55(5)  | 8(4)   | 13(4)  | -3(4)  |
| C(36) | 48(5)  | 44(5)   | 35(4)  | -16(4) | 18(4)  | -4(4)  |
| C(37) | 39(4)  | 37(5)   | 22(4)  | -2(4)  | -8(4)  | -2(4)  |
| C(38) | 63(5)  | 37(5)   | 28(4)  | 16(4)  | -2(4)  | 4(4)   |

|       |        |        |       |        |       |        |
|-------|--------|--------|-------|--------|-------|--------|
| C(39) | 22(4)  | 42(5)  | 53(5) | 10(4)  | 1(4)  | -6(4)  |
| C(40) | 30(4)  | 21(4)  | 37(4) | 6(4)   | 11(3) | -6(4)  |
| C(41) | 73(6)  | 42(6)  | 38(5) | -20(4) | 19(4) | -20(5) |
| C(42) | 26(4)  | 23(5)  | 38(4) | -5(3)  | 4(3)  | -9(4)  |
| N(1)  | 17(3)  | 16(3)  | 24(3) | 3(3)   | 12(3) | 2(3)   |
| N(2)  | 22(3)  | 23(4)  | 33(3) | -6(3)  | 10(3) | -2(3)  |
| N(3)  | 22(3)  | 19(4)  | 28(3) | 4(3)   | 10(3) | -5(3)  |
| N(4)  | 23(3)  | 18(4)  | 21(3) | 7(3)   | -2(3) | -5(3)  |
| N(5)  | 39(4)  | 36(4)  | 27(3) | 8(3)   | 18(3) | 13(3)  |
| N(6)  | 24(3)  | 22(4)  | 30(3) | 1(3)   | 8(3)  | 3(3)   |
| N(7)  | 25(3)  | 17(4)  | 22(3) | 1(3)   | -5(3) | 5(3)   |
| N(8)  | 20(3)  | 24(4)  | 31(3) | -4(3)  | 8(3)  | -1(3)  |
| O(1)  | 32(3)  | 21(3)  | 38(3) | 3(2)   | 7(2)  | -9(2)  |
| O(2)  | 21(3)  | 36(3)  | 69(3) | -13(3) | 11(3) | 5(2)   |
| O(3)  | 28(3)  | 18(3)  | 36(3) | 0(2)   | 10(2) | 0(2)   |
| O(4)  | 23(3)  | 24(3)  | 52(3) | 3(2)   | 14(2) | -1(2)  |
| O(5)  | 52(4)  | 54(4)  | 35(3) | 0(3)   | 12(3) | -21(3) |
| O(6)  | 27(3)  | 41(4)  | 43(3) | 9(2)   | 8(3)  | 3(3)   |
| O(7)  | 126(6) | 118(7) | 87(6) | 11(4)  | 40(5) | 3(5)   |
| S(1)  | 36(1)  | 22(1)  | 44(1) | -5(1)  | 22(1) | -3(1)  |
| S(2)  | 29(1)  | 21(1)  | 36(1) | -2(1)  | 12(1) | -2(1)  |
| S(3)  | 28(1)  | 31(1)  | 25(1) | 1(1)   | 4(1)  | 1(1)   |
| S(4)  | 30(1)  | 25(1)  | 35(1) | 2(1)   | 16(1) | 2(1)   |
| S(5)  | 33(1)  | 22(1)  | 33(1) | -1(1)  | 16(1) | -1(1)  |
| S(6)  | 33(1)  | 28(1)  | 24(1) | -3(1)  | 3(1)  | -5(1)  |
| Fe(1) | 24(1)  | 21(1)  | 24(1) | 1(1)   | 7(1)  | 1(1)   |
| Fe(2) | 24(1)  | 22(1)  | 22(1) | -1(1)  | 7(1)  | 0(1)   |

---

**Table S-43.** Hydrogen coordinates (  $\times 10^4$  ) and isotropic displacement parameters ( $\text{Å}^2 \times 10^3$ ) for  $(\text{Me}_4\text{N})_2[\text{Fe}^{\text{III}}(\text{tame}-\text{N}_2\text{S})\text{S}_2^{\text{Me}_2}]\cdot 3\text{H}_2\text{O}$  (**15a**).

|        | x    | y     | z    | U(eq) |
|--------|------|-------|------|-------|
| H(1A)  | 5180 | 6506  | 1024 | 61    |
| H(1B)  | 5220 | 5068  | 915  | 61    |
| H(1C)  | 4943 | 5514  | 1362 | 61    |
| H(2A)  | 3693 | 6067  | 83   | 55    |
| H(2B)  | 4428 | 5294  | 140  | 55    |
| H(2C)  | 4458 | 6745  | 234  | 55    |
| H(5A)  | 2726 | 8158  | 1140 | 32    |
| H(5B)  | 3348 | 7915  | 1584 | 32    |
| H(7A)  | 1315 | 6510  | 1479 | 32    |
| H(7B)  | 1602 | 6939  | 1034 | 32    |
| H(8A)  | 2244 | 6043  | 2176 | 36    |
| H(8B)  | 2904 | 6975  | 2316 | 36    |
| H(9A)  | 2456 | 8882  | 1966 | 55    |
| H(9B)  | 1718 | 8186  | 1989 | 55    |
| H(9C)  | 1812 | 8838  | 1523 | 55    |
| H(12A) | 2070 | 3062  | 1959 | 56    |
| H(12B) | 1811 | 1716  | 1777 | 56    |
| H(12C) | 1227 | 2725  | 1849 | 56    |
| H(13A) | 1206 | 1397  | 957  | 49    |
| H(13B) | 1018 | 2559  | 623  | 49    |
| H(13C) | 591  | 2347  | 1029 | 49    |
| H(14A) | 1234 | 2142  | 5043 | 53    |
| H(14B) | 466  | 1470  | 4979 | 53    |
| H(14C) | 504  | 2926  | 4907 | 53    |
| H(15A) | -251 | 2786  | 4124 | 44    |
| H(15B) | -322 | 1324  | 4168 | 44    |
| H(15C) | -18  | 1901  | 3750 | 44    |
| H(18A) | 2157 | 4263  | 3928 | 35    |
| H(18B) | 1457 | 4125  | 3525 | 35    |
| H(20A) | 2325 | 2244  | 2783 | 37    |
| H(20B) | 1685 | 3219  | 2731 | 37    |
| H(21A) | 3391 | 2543  | 3423 | 32    |
| H(21B) | 3223 | 2956  | 3907 | 32    |
| H(22A) | 3025 | 4856  | 3447 | 48    |
| H(22B) | 2272 | 5070  | 3095 | 48    |
| H(22C) | 2904 | 4303  | 2939 | 48    |
| H(25A) | 2394 | -910  | 2923 | 50    |
| H(25B) | 2637 | -2269 | 3098 | 50    |
| H(25C) | 3212 | -1347 | 2953 | 50    |
| H(26A) | 4019 | -1706 | 3729 | 57    |

|        |      |       |      |     |
|--------|------|-------|------|-----|
| H(26B) | 3424 | -2578 | 3879 | 57  |
| H(26C) | 3732 | -1414 | 4188 | 57  |
| H(27A) | 3341 | -671  | -304 | 158 |
| H(27B) | 3915 | -1063 | 147  | 158 |
| H(27C) | 4126 | -50   | -194 | 158 |
| H(28A) | 3534 | 2077  | -189 | 90  |
| H(28B) | 3004 | 2305  | 159  | 90  |
| H(28C) | 2745 | 1469  | -288 | 90  |
| H(29A) | 4439 | 1192  | 553  | 105 |
| H(29B) | 4069 | 209   | 833  | 105 |
| H(29C) | 3795 | 1607  | 796  | 105 |
| H(30A) | 2594 | 708   | 534  | 140 |
| H(30B) | 2980 | -611  | 576  | 140 |
| H(30C) | 2459 | -209  | 105  | 140 |
| H(31A) | 4961 | 591   | 2801 | 51  |
| H(31B) | 5493 | 1578  | 2646 | 51  |
| H(31C) | 5171 | 476   | 2309 | 51  |
| H(32A) | 4750 | 1988  | 1719 | 61  |
| H(32B) | 5005 | 3127  | 2055 | 61  |
| H(32C) | 4178 | 3019  | 1792 | 61  |
| H(33A) | 3904 | 3260  | 2570 | 64  |
| H(33B) | 4739 | 3181  | 2818 | 64  |
| H(33C) | 4168 | 2231  | 2952 | 64  |
| H(34A) | 3919 | 405   | 1961 | 73  |
| H(34B) | 3398 | 1548  | 1995 | 73  |
| H(34C) | 3639 | 649   | 2425 | 73  |
| H(35A) | 3007 | 441   | 5505 | 55  |
| H(35B) | 2422 | 951   | 5079 | 55  |
| H(35C) | 2632 | 1749  | 5539 | 55  |
| H(36A) | 4076 | 1308  | 4710 | 61  |
| H(36B) | 3284 | 722   | 4570 | 61  |
| H(36C) | 3856 | 168   | 4993 | 61  |
| H(37A) | 4401 | 2550  | 5417 | 52  |
| H(37B) | 4232 | 1338  | 5682 | 52  |
| H(37C) | 3852 | 2615  | 5760 | 52  |
| H(38A) | 2936 | 3490  | 5117 | 67  |
| H(38B) | 2728 | 2739  | 4646 | 67  |
| H(38C) | 3507 | 3372  | 4790 | 67  |
| H(39A) | 777  | 6638  | 3114 | 60  |
| H(39B) | 1269 | 7725  | 2981 | 60  |
| H(39C) | 905  | 6750  | 2600 | 60  |
| H(40A) | 306  | 8328  | 2092 | 44  |
| H(40B) | 715  | 9324  | 2449 | 44  |
| H(40C) | -145 | 9385  | 2281 | 44  |
| H(41A) | -293 | 9331  | 3073 | 75  |
| H(41B) | 565  | 9268  | 3249 | 75  |
| H(41C) | 59   | 8240  | 3406 | 75  |
| H(42A) | -425 | 6767  | 2339 | 44  |

|        |          |          |          |    |
|--------|----------|----------|----------|----|
| H(42B) | -894     | 7767     | 2544     | 44 |
| H(42C) | -499     | 6681     | 2864     | 44 |
| H(51)  | 5180(20) | 9390(50) | 1598(15) | 50 |
| H(52)  | 4590(20) | 8810(60) | 1466(10) | 50 |
| H(61)  | 380(20)  | 4950(40) | 3732(17) | 50 |
| H(62)  | -269(8)  | 5220(50) | 3552(19) | 50 |
| H(71)  | 430(30)  | 6290(50) | 360(14)  | 50 |
| H(72)  | 350(30)  | 5820(50) | 736(16)  | 50 |

---



**Table S-44.** Crystal data and structure refinement for  $(\text{Et}_4\text{N})_2[\text{Fe}^{\text{III}}(\text{tame}-\text{N}_2\text{SO}_2)_2\text{S}_2^{\text{Me}_2}]\cdot\text{MeCN}$  (**20**).

|                                                                                               |                                                                                                                |
|-----------------------------------------------------------------------------------------------|----------------------------------------------------------------------------------------------------------------|
| Empirical formula                                                                             | C31 H64 Fe N5 O4 S3                                                                                            |
| Formula weight                                                                                | 722.90                                                                                                         |
| Temperature                                                                                   | 130(2) K                                                                                                       |
| Wavelength                                                                                    | 0.71073 Å                                                                                                      |
| Crystal description/color                                                                     | prism / red                                                                                                    |
| Crystal system, space group                                                                   | Monoclinic, P 21/c                                                                                             |
| Unit cell dimensions                                                                          | a = 11.1840(4)Å alpha = 90 deg.<br>b = 17.9000(6)Å beta = 112.9030(14) deg.<br>c = 20.8980(7)Å gamma = 90 deg. |
| Volume                                                                                        | 3853.8(2) Å <sup>3</sup>                                                                                       |
| Z, Calculated density                                                                         | 4, 1.246 Mg/m <sup>3</sup>                                                                                     |
| Absorption coefficient                                                                        | 0.593 mm <sup>-1</sup>                                                                                         |
| F(000)                                                                                        | 1564                                                                                                           |
| Crystal size                                                                                  | 0.31 x 0.24 x 0.12 mm                                                                                          |
| Reflections for indexing                                                                      | 749                                                                                                            |
| Theta range for data collection                                                               | 2.12 to 28.40 deg.                                                                                             |
| Index ranges                                                                                  | -14<=h<=14, -22<=k<=23, -27<=l<=27                                                                             |
| Reflections collected / unique                                                                | 16700 / 8809 [R(int) = 0.0973]                                                                                 |
| Completeness to theta = 25.00                                                                 | 98.5%                                                                                                          |
| Absorption correction                                                                         | Semi-empirical from equivalents                                                                                |
| Max. and min. transmission                                                                    | 0.9323 and 0.8376                                                                                              |
| Refinement method                                                                             | Full-matrix least-squares on F <sup>2</sup>                                                                    |
| Data / restraints / parameters                                                                | 8809 / 6 / 430                                                                                                 |
| Goodness-of-fit on F <sup>2</sup>                                                             | S = 0.960                                                                                                      |
| S = root(sum(w*D*D)/(n-p)), where D = (Fo*Fo - Fc*Fc)                                         |                                                                                                                |
| Final R indices [I>2sigma(I)]                                                                 | *R1 = 0.0627, wR2 = 0.1428                                                                                     |
| R indices (all data)                                                                          | R1 = 0.1827, *wR2 = 0.2015                                                                                     |
| *Report these R factors.                                                                      |                                                                                                                |
| R1 = sum( Fo - Fc )/sum Fo , wR2= root(sum(w*D*D)/sum(w*Fo*Fo)),<br>where D = (Fo*Fo - Fc*Fc) |                                                                                                                |
| Weighting scheme                                                                              | calc w=1/[\s^2^(Fo^2^)+(0.0906P)^2^+0.0000P]<br>where P=(Fo^2^+2Fc^2^)/3                                       |
| Largest diff. peak and hole                                                                   | 0.563 and -0.465 e.Å <sup>-3</sup>                                                                             |

**Table S-45.** Atomic coordinates (  $\times 10^4$ ) and equivalent isotropic displacement parameters ( $\text{\AA}^2 \times 10^3$ ) for  $(\text{Et}_4\text{N})_2[\text{Fe}^{\text{III}}(\text{tame}-\text{N}_2\text{SO}_2)\text{S}_2^{\text{Me}_2}]\cdot\text{MeCN}$  (**20**).  $U(\text{eq})$  is defined as one third of the trace of the orthogonalized  $U_{ij}$  tensor.

|       | x       | y       | z       | $U(\text{eq})$ |
|-------|---------|---------|---------|----------------|
| Fe(1) | 4284(1) | 2685(1) | 2545(1) | 45(1)          |
| S(1)  | 6212(1) | 3112(1) | 2638(1) | 52(1)          |
| S(2)  | 3961(1) | 2346(1) | 1468(1) | 49(1)          |
| S(3)  | 2087(2) | 3639(1) | 2654(1) | 52(1)          |
| S(4)  | 3004(7) | 3878(4) | 3083(3) | 51(2)          |
| O(1)  | 6805(4) | 2752(2) | 4579(2) | 69(1)          |
| O(2)  | 1233(3) | 1232(2) | 1782(2) | 54(1)          |
| O(3)  | 3292(3) | 3645(2) | 2493(2) | 50(1)          |
| O(4)  | 1823(4) | 4427(2) | 2801(2) | 64(1)          |
| N(1)  | 5042(4) | 2592(2) | 3550(2) | 50(1)          |
| N(2)  | 2810(4) | 2051(2) | 2442(2) | 47(1)          |
| N(3)  | 6548(4) | 62(2)   | 3921(2) | 48(1)          |
| N(4)  | 7603(4) | 1322(2) | 1319(2) | 46(1)          |
| N(5)  | 7923(6) | 5086(3) | 1135(3) | 85(2)          |
| C(1)  | 8382(5) | 3091(4) | 3861(3) | 69(2)          |
| C(2)  | 6757(6) | 4119(3) | 3706(3) | 65(2)          |
| C(3)  | 6941(5) | 3289(3) | 3572(3) | 54(1)          |
| C(4)  | 6254(5) | 2837(3) | 3937(3) | 57(1)          |
| C(5)  | 4340(5) | 2294(3) | 3959(3) | 62(1)          |
| C(6)  | 2882(5) | 2398(3) | 3621(3) | 54(1)          |
| C(7)  | 2631(8) | 3251(5) | 3528(4) | 53(2)          |
| C(8)  | 2336(6) | 2109(3) | 4152(3) | 67(2)          |
| C(9)  | 2318(5) | 1900(3) | 2995(3) | 56(1)          |
| C(10) | 2121(5) | 1692(3) | 1850(3) | 46(1)          |
| C(11) | 2372(5) | 1901(3) | 1208(2) | 46(1)          |
| C(12) | 1312(5) | 2461(3) | 797(3)  | 53(1)          |
| C(13) | 2307(5) | 1225(3) | 764(3)  | 54(1)          |
| C(14) | 7041(6) | 861(3)  | 4067(3) | 67(2)          |
| C(15) | 7868(6) | 1043(3) | 4824(3) | 75(2)          |
| C(16) | 5824(6) | -32(3)  | 3138(3) | 65(2)          |
| C(17) | 4681(5) | 472(3)  | 2820(3) | 67(2)          |
| C(18) | 5668(5) | -95(3)  | 4305(3) | 64(2)          |
| C(19) | 5070(6) | -877(3) | 4180(3) | 63(2)          |
| C(20) | 7670(6) | -496(3) | 4155(3) | 69(2)          |
| C(21) | 8777(5) | -303(3) | 3940(3) | 69(2)          |
| C(22) | 6347(5) | 906(4)  | 1165(3) | 69(2)          |
| C(23) | 5364(6) | 977(4)  | 463(3)  | 81(2)          |
| C(24) | 8566(5) | 1138(3) | 2049(3) | 62(1)          |
| C(25) | 8224(7) | 1416(4) | 2623(3) | 82(2)          |

|       |          |          |          |       |
|-------|----------|----------|----------|-------|
| C(26) | 7313(5)  | 2163(3)  | 1238(3)  | 62(2) |
| C(27) | 8434(6)  | 2675(3)  | 1446(3)  | 77(2) |
| C(28) | 8222(5)  | 1106(3)  | 812(3)   | 60(1) |
| C(29) | 8366(6)  | 286(3)   | 724(3)   | 66(2) |
| C(30) | 8277(6)  | 4883(3)  | 1702(4)  | 63(2) |
| C(31) | 8701(5)  | 4641(3)  | 2406(3)  | 63(2) |
| C(32) | 2140(20) | 3132(15) | 3280(14) | 38(7) |

---

**Table S-46.** Bond lengths [Å] and angles [deg] for  $(\text{Et}_4\text{N})_2[\text{Fe}^{\text{III}}(\text{tame-N}_2\text{SO}_2)_2\text{S}_2^{\text{Me}_2}] \cdot \text{MeCN}$  (**20**).

---

|            |            |
|------------|------------|
| Fe(1)-N(1) | 1.941(4)   |
| Fe(1)-N(2) | 1.942(4)   |
| Fe(1)-O(3) | 2.025(3)   |
| Fe(1)-S(2) | 2.2219(14) |
| Fe(1)-S(1) | 2.2246(15) |
| S(1)-C(3)  | 1.828(5)   |
| S(2)-C(11) | 1.826(5)   |
| S(3)-S(4)  | 1.150(7)   |
| S(3)-O(4)  | 1.498(4)   |
| S(3)-O(3)  | 1.511(3)   |
| S(3)-C(7)  | 1.823(8)   |
| S(4)-O(3)  | 1.452(6)   |
| S(4)-O(4)  | 1.566(7)   |
| S(4)-C(32) | 1.79(3)    |
| O(1)-C(4)  | 1.249(6)   |
| O(2)-C(10) | 1.255(5)   |
| N(1)-C(4)  | 1.352(7)   |
| N(1)-C(5)  | 1.468(6)   |
| N(2)-C(10) | 1.340(6)   |
| N(2)-C(9)  | 1.486(6)   |
| N(3)-C(18) | 1.519(6)   |
| N(3)-C(14) | 1.520(7)   |
| N(3)-C(20) | 1.527(6)   |
| N(3)-C(16) | 1.527(6)   |
| N(4)-C(22) | 1.510(6)   |
| N(4)-C(24) | 1.522(6)   |
| N(4)-C(28) | 1.524(6)   |
| N(4)-C(26) | 1.534(7)   |
| N(5)-C(30) | 1.152(7)   |
| C(1)-C(3)  | 1.526(7)   |
| C(1)-H(1A) | 0.9800     |
| C(1)-H(1B) | 0.9800     |
| C(1)-H(1C) | 0.9800     |
| C(2)-C(3)  | 1.540(7)   |
| C(2)-H(2A) | 0.9800     |
| C(2)-H(2B) | 0.9800     |
| C(2)-H(2C) | 0.9800     |
| C(3)-C(4)  | 1.511(7)   |
| C(5)-C(6)  | 1.516(7)   |
| C(5)-H(5A) | 0.9900     |
| C(5)-H(5B) | 0.9900     |
| C(6)-C(9)  | 1.504(7)   |
| C(6)-C(8)  | 1.550(6)   |

|              |          |
|--------------|----------|
| C(6)-C(7)    | 1.551(9) |
| C(6)-C(32)   | 1.57(3)  |
| C(7)-H(7A)   | 0.9900   |
| C(7)-H(7B)   | 0.9900   |
| C(8)-H(8A)   | 0.9800   |
| C(8)-H(8B)   | 0.9800   |
| C(8)-H(8C)   | 0.9800   |
| C(9)-H(9A)   | 0.9900   |
| C(9)-H(9B)   | 0.9900   |
| C(10)-C(11)  | 1.521(6) |
| C(11)-C(13)  | 1.510(6) |
| C(11)-C(12)  | 1.535(7) |
| C(12)-H(12A) | 0.9800   |
| C(12)-H(12B) | 0.9800   |
| C(12)-H(12C) | 0.9800   |
| C(13)-H(13A) | 0.9800   |
| C(13)-H(13B) | 0.9800   |
| C(13)-H(13C) | 0.9800   |
| C(14)-C(15)  | 1.525(7) |
| C(14)-H(14A) | 0.9900   |
| C(14)-H(14B) | 0.9900   |
| C(15)-H(15A) | 0.9800   |
| C(15)-H(15B) | 0.9800   |
| C(15)-H(15C) | 0.9800   |
| C(16)-C(17)  | 1.492(7) |
| C(16)-H(16A) | 0.9900   |
| C(16)-H(16B) | 0.9900   |
| C(17)-H(17A) | 0.9800   |
| C(17)-H(17B) | 0.9800   |
| C(17)-H(17C) | 0.9800   |
| C(18)-C(19)  | 1.529(7) |
| C(18)-H(18A) | 0.9900   |
| C(18)-H(18B) | 0.9900   |
| C(19)-H(19A) | 0.9800   |
| C(19)-H(19B) | 0.9800   |
| C(19)-H(19C) | 0.9800   |
| C(20)-C(21)  | 1.512(7) |
| C(20)-H(20A) | 0.9900   |
| C(20)-H(20B) | 0.9900   |
| C(21)-H(21A) | 0.9800   |
| C(21)-H(21B) | 0.9800   |
| C(21)-H(21C) | 0.9800   |
| C(22)-C(23)  | 1.456(8) |
| C(22)-H(22A) | 0.9900   |
| C(22)-H(22B) | 0.9900   |
| C(23)-H(23A) | 0.9800   |
| C(23)-H(23B) | 0.9800   |
| C(23)-H(23C) | 0.9800   |

|                  |            |
|------------------|------------|
| C(24)-C(25)      | 1.481(7)   |
| C(24)-H(24A)     | 0.9900     |
| C(24)-H(24B)     | 0.9900     |
| C(25)-H(25A)     | 0.9800     |
| C(25)-H(25B)     | 0.9800     |
| C(25)-H(25C)     | 0.9800     |
| C(26)-C(27)      | 1.475(8)   |
| C(26)-H(26A)     | 0.9900     |
| C(26)-H(26B)     | 0.9900     |
| C(27)-H(27A)     | 0.9800     |
| C(27)-H(27B)     | 0.9800     |
| C(27)-H(27C)     | 0.9800     |
| C(28)-C(29)      | 1.497(7)   |
| C(28)-H(28A)     | 0.9900     |
| C(28)-H(28B)     | 0.9900     |
| C(29)-H(29A)     | 0.9800     |
| C(29)-H(29B)     | 0.9800     |
| C(29)-H(29C)     | 0.9800     |
| C(30)-C(31)      | 1.426(8)   |
| C(31)-H(31A)     | 0.9800     |
| C(31)-H(31B)     | 0.9800     |
| C(31)-H(31C)     | 0.9800     |
| C(32)-H(32A)     | 0.9900     |
| C(32)-H(32B)     | 0.9900     |
| N(1)-Fe(1)-N(2)  | 93.72(17)  |
| N(1)-Fe(1)-O(3)  | 97.52(15)  |
| N(2)-Fe(1)-O(3)  | 93.80(15)  |
| N(1)-Fe(1)-S(2)  | 154.56(13) |
| N(2)-Fe(1)-S(2)  | 86.09(12)  |
| O(3)-Fe(1)-S(2)  | 107.88(10) |
| N(1)-Fe(1)-S(1)  | 86.26(13)  |
| N(2)-Fe(1)-S(1)  | 164.26(13) |
| O(3)-Fe(1)-S(1)  | 101.82(10) |
| S(2)-Fe(1)-S(1)  | 87.23(5)   |
| C(3)-S(1)-Fe(1)  | 99.58(18)  |
| C(11)-S(2)-Fe(1) | 100.14(15) |
| S(4)-S(3)-O(4)   | 71.2(3)    |
| S(4)-S(3)-O(3)   | 64.5(3)    |
| O(4)-S(3)-O(3)   | 107.7(2)   |
| S(4)-S(3)-C(7)   | 60.8(4)    |
| O(4)-S(3)-C(7)   | 99.7(3)    |
| O(3)-S(3)-C(7)   | 104.3(3)   |
| S(3)-S(4)-O(3)   | 69.9(4)    |
| S(3)-S(4)-O(4)   | 64.8(3)    |
| O(3)-S(4)-O(4)   | 107.1(4)   |
| S(3)-S(4)-C(32)  | 60.3(9)    |
| O(3)-S(4)-C(32)  | 107.4(10)  |
| O(4)-S(4)-C(32)  | 95.9(9)    |

|                  |            |
|------------------|------------|
| S(4)-O(3)-S(3)   | 45.6(3)    |
| S(4)-O(3)-Fe(1)  | 119.7(3)   |
| S(3)-O(3)-Fe(1)  | 119.95(19) |
| C(4)-N(1)-C(5)   | 114.1(4)   |
| C(4)-N(1)-Fe(1)  | 122.2(3)   |
| C(5)-N(1)-Fe(1)  | 123.6(3)   |
| C(10)-N(2)-C(9)  | 112.2(4)   |
| C(10)-N(2)-Fe(1) | 122.7(3)   |
| C(9)-N(2)-Fe(1)  | 125.1(3)   |
| C(18)-N(3)-C(14) | 109.1(4)   |
| C(18)-N(3)-C(20) | 109.3(4)   |
| C(14)-N(3)-C(20) | 111.2(4)   |
| C(18)-N(3)-C(16) | 111.3(4)   |
| C(14)-N(3)-C(16) | 108.5(4)   |
| C(20)-N(3)-C(16) | 107.4(4)   |
| C(22)-N(4)-C(24) | 110.1(4)   |
| C(22)-N(4)-C(28) | 111.2(4)   |
| C(24)-N(4)-C(28) | 107.8(4)   |
| C(22)-N(4)-C(26) | 108.7(4)   |
| C(24)-N(4)-C(26) | 111.1(4)   |
| C(28)-N(4)-C(26) | 107.8(4)   |
| C(3)-C(1)-H(1A)  | 109.5      |
| C(3)-C(1)-H(1B)  | 109.5      |
| H(1A)-C(1)-H(1B) | 109.5      |
| C(3)-C(1)-H(1C)  | 109.5      |
| H(1A)-C(1)-H(1C) | 109.5      |
| H(1B)-C(1)-H(1C) | 109.5      |
| C(3)-C(2)-H(2A)  | 109.5      |
| C(3)-C(2)-H(2B)  | 109.5      |
| H(2A)-C(2)-H(2B) | 109.5      |
| C(3)-C(2)-H(2C)  | 109.5      |
| H(2A)-C(2)-H(2C) | 109.5      |
| H(2B)-C(2)-H(2C) | 109.5      |
| C(4)-C(3)-C(1)   | 110.0(4)   |
| C(4)-C(3)-C(2)   | 107.2(4)   |
| C(1)-C(3)-C(2)   | 110.3(5)   |
| C(4)-C(3)-S(1)   | 110.0(4)   |
| C(1)-C(3)-S(1)   | 110.2(4)   |
| C(2)-C(3)-S(1)   | 109.0(4)   |
| O(1)-C(4)-N(1)   | 124.4(5)   |
| O(1)-C(4)-C(3)   | 118.1(5)   |
| N(1)-C(4)-C(3)   | 117.4(4)   |
| N(1)-C(5)-C(6)   | 114.0(4)   |
| N(1)-C(5)-H(5A)  | 108.8      |
| C(6)-C(5)-H(5A)  | 108.8      |
| N(1)-C(5)-H(5B)  | 108.8      |
| C(6)-C(5)-H(5B)  | 108.8      |
| H(5A)-C(5)-H(5B) | 107.7      |

|                     |           |
|---------------------|-----------|
| C(9)-C(6)-C(5)      | 110.1(4)  |
| C(9)-C(6)-C(8)      | 106.0(4)  |
| C(5)-C(6)-C(8)      | 106.1(4)  |
| C(9)-C(6)-C(7)      | 118.7(5)  |
| C(5)-C(6)-C(7)      | 106.8(5)  |
| C(8)-C(6)-C(7)      | 108.5(5)  |
| C(9)-C(6)-C(32)     | 97.6(10)  |
| C(5)-C(6)-C(32)     | 126.7(10) |
| C(8)-C(6)-C(32)     | 108.6(11) |
| C(6)-C(7)-S(3)      | 118.3(5)  |
| C(6)-C(7)-H(7A)     | 107.7     |
| S(3)-C(7)-H(7A)     | 107.7     |
| C(6)-C(7)-H(7B)     | 107.7     |
| S(3)-C(7)-H(7B)     | 107.7     |
| H(7A)-C(7)-H(7B)    | 107.1     |
| C(6)-C(8)-H(8A)     | 109.5     |
| C(6)-C(8)-H(8B)     | 109.5     |
| H(8A)-C(8)-H(8B)    | 109.5     |
| C(6)-C(8)-H(8C)     | 109.5     |
| H(8A)-C(8)-H(8C)    | 109.5     |
| H(8B)-C(8)-H(8C)    | 109.5     |
| N(2)-C(9)-C(6)      | 114.3(4)  |
| N(2)-C(9)-H(9A)     | 108.7     |
| C(6)-C(9)-H(9A)     | 108.7     |
| N(2)-C(9)-H(9B)     | 108.7     |
| C(6)-C(9)-H(9B)     | 108.7     |
| H(9A)-C(9)-H(9B)    | 107.6     |
| O(2)-C(10)-N(2)     | 124.4(4)  |
| O(2)-C(10)-C(11)    | 118.1(4)  |
| N(2)-C(10)-C(11)    | 117.3(4)  |
| C(13)-C(11)-C(10)   | 111.3(4)  |
| C(13)-C(11)-C(12)   | 109.8(4)  |
| C(10)-C(11)-C(12)   | 106.7(4)  |
| C(13)-C(11)-S(2)    | 109.9(3)  |
| C(10)-C(11)-S(2)    | 109.7(3)  |
| C(12)-C(11)-S(2)    | 109.4(3)  |
| C(11)-C(12)-H(12A)  | 109.5     |
| C(11)-C(12)-H(12B)  | 109.5     |
| H(12A)-C(12)-H(12B) | 109.5     |
| C(11)-C(12)-H(12C)  | 109.5     |
| H(12A)-C(12)-H(12C) | 109.5     |
| H(12B)-C(12)-H(12C) | 109.5     |
| C(11)-C(13)-H(13A)  | 109.5     |
| C(11)-C(13)-H(13B)  | 109.5     |
| H(13A)-C(13)-H(13B) | 109.5     |
| C(11)-C(13)-H(13C)  | 109.5     |
| H(13A)-C(13)-H(13C) | 109.5     |
| H(13B)-C(13)-H(13C) | 109.5     |



|                     |          |
|---------------------|----------|
| N(3)-C(14)-C(15)    | 115.8(5) |
| N(3)-C(14)-H(14A)   | 108.3    |
| C(15)-C(14)-H(14A)  | 108.3    |
| N(3)-C(14)-H(14B)   | 108.3    |
| C(15)-C(14)-H(14B)  | 108.3    |
| H(14A)-C(14)-H(14B) | 107.4    |
| C(14)-C(15)-H(15A)  | 109.5    |
| C(14)-C(15)-H(15B)  | 109.5    |
| H(15A)-C(15)-H(15B) | 109.5    |
| C(14)-C(15)-H(15C)  | 109.5    |
| H(15A)-C(15)-H(15C) | 109.5    |
| H(15B)-C(15)-H(15C) | 109.5    |
| C(17)-C(16)-N(3)    | 114.6(4) |
| C(17)-C(16)-H(16A)  | 108.6    |
| N(3)-C(16)-H(16A)   | 108.6    |
| C(17)-C(16)-H(16B)  | 108.6    |
| N(3)-C(16)-H(16B)   | 108.6    |
| H(16A)-C(16)-H(16B) | 107.6    |
| C(16)-C(17)-H(17A)  | 109.5    |
| C(16)-C(17)-H(17B)  | 109.5    |
| H(17A)-C(17)-H(17B) | 109.5    |
| C(16)-C(17)-H(17C)  | 109.5    |
| H(17A)-C(17)-H(17C) | 109.5    |
| H(17B)-C(17)-H(17C) | 109.5    |
| N(3)-C(18)-C(19)    | 114.1(4) |
| N(3)-C(18)-H(18A)   | 108.7    |
| C(19)-C(18)-H(18A)  | 108.7    |
| N(3)-C(18)-H(18B)   | 108.7    |
| C(19)-C(18)-H(18B)  | 108.7    |
| H(18A)-C(18)-H(18B) | 107.6    |
| C(18)-C(19)-H(19A)  | 109.5    |
| C(18)-C(19)-H(19B)  | 109.5    |
| H(19A)-C(19)-H(19B) | 109.5    |
| C(18)-C(19)-H(19C)  | 109.5    |
| H(19A)-C(19)-H(19C) | 109.5    |
| H(19B)-C(19)-H(19C) | 109.5    |
| C(21)-C(20)-N(3)    | 114.9(5) |
| C(21)-C(20)-H(20A)  | 108.5    |
| N(3)-C(20)-H(20A)   | 108.5    |
| C(21)-C(20)-H(20B)  | 108.5    |
| N(3)-C(20)-H(20B)   | 108.5    |
| H(20A)-C(20)-H(20B) | 107.5    |
| C(20)-C(21)-H(21A)  | 109.5    |
| C(20)-C(21)-H(21B)  | 109.5    |
| H(21A)-C(21)-H(21B) | 109.5    |
| C(20)-C(21)-H(21C)  | 109.5    |
| H(21A)-C(21)-H(21C) | 109.5    |
| H(21B)-C(21)-H(21C) | 109.5    |

|                     |          |
|---------------------|----------|
| C(23)-C(22)-N(4)    | 116.6(5) |
| C(23)-C(22)-H(22A)  | 108.1    |
| N(4)-C(22)-H(22A)   | 108.1    |
| C(23)-C(22)-H(22B)  | 108.1    |
| N(4)-C(22)-H(22B)   | 108.1    |
| H(22A)-C(22)-H(22B) | 107.3    |
| C(22)-C(23)-H(23A)  | 109.5    |
| C(22)-C(23)-H(23B)  | 109.5    |
| H(23A)-C(23)-H(23B) | 109.5    |
| C(22)-C(23)-H(23C)  | 109.5    |
| H(23A)-C(23)-H(23C) | 109.5    |
| H(23B)-C(23)-H(23C) | 109.5    |
| C(25)-C(24)-N(4)    | 115.7(5) |
| C(25)-C(24)-H(24A)  | 108.4    |
| N(4)-C(24)-H(24A)   | 108.4    |
| C(25)-C(24)-H(24B)  | 108.4    |
| N(4)-C(24)-H(24B)   | 108.4    |
| H(24A)-C(24)-H(24B) | 107.4    |
| C(24)-C(25)-H(25A)  | 109.5    |
| C(24)-C(25)-H(25B)  | 109.5    |
| H(25A)-C(25)-H(25B) | 109.5    |
| C(24)-C(25)-H(25C)  | 109.5    |
| H(25A)-C(25)-H(25C) | 109.5    |
| H(25B)-C(25)-H(25C) | 109.5    |
| C(27)-C(26)-N(4)    | 117.2(5) |
| C(27)-C(26)-H(26A)  | 108.0    |
| N(4)-C(26)-H(26A)   | 108.0    |
| C(27)-C(26)-H(26B)  | 108.0    |
| N(4)-C(26)-H(26B)   | 108.0    |
| H(26A)-C(26)-H(26B) | 107.2    |
| C(26)-C(27)-H(27A)  | 109.5    |
| C(26)-C(27)-H(27B)  | 109.5    |
| H(27A)-C(27)-H(27B) | 109.5    |
| C(26)-C(27)-H(27C)  | 109.5    |
| H(27A)-C(27)-H(27C) | 109.5    |
| H(27B)-C(27)-H(27C) | 109.5    |
| C(29)-C(28)-N(4)    | 115.7(4) |
| C(29)-C(28)-H(28A)  | 108.3    |
| N(4)-C(28)-H(28A)   | 108.3    |
| C(29)-C(28)-H(28B)  | 108.3    |
| N(4)-C(28)-H(28B)   | 108.3    |
| H(28A)-C(28)-H(28B) | 107.4    |
| C(28)-C(29)-H(29A)  | 109.5    |
| C(28)-C(29)-H(29B)  | 109.5    |
| H(29A)-C(29)-H(29B) | 109.5    |
| C(28)-C(29)-H(29C)  | 109.5    |
| H(29A)-C(29)-H(29C) | 109.5    |
| H(29B)-C(29)-H(29C) | 109.5    |

|                     |           |
|---------------------|-----------|
| N(5)-C(30)-C(31)    | 179.1(7)  |
| C(30)-C(31)-H(31A)  | 109.5     |
| C(30)-C(31)-H(31B)  | 109.5     |
| H(31A)-C(31)-H(31B) | 109.5     |
| C(30)-C(31)-H(31C)  | 109.5     |
| H(31A)-C(31)-H(31C) | 109.5     |
| H(31B)-C(31)-H(31C) | 109.5     |
| C(6)-C(32)-S(4)     | 119.4(16) |
| C(6)-C(32)-H(32A)   | 107.5     |
| S(4)-C(32)-H(32A)   | 107.5     |
| C(6)-C(32)-H(32B)   | 107.5     |
| S(4)-C(32)-H(32B)   | 107.5     |
| H(32A)-C(32)-H(32B) | 107.0     |

---

Symmetry transformations used to generate equivalent atoms:

**Table S-47.** Anisotropic displacement parameters ( $\text{Å}^2 \times 10^3$ ) for  $(\text{Et}_4\text{N})_2[\text{Fe}^{\text{III}}(\text{tame}-\text{N}_2\text{SO}_2)_2\text{S}_2^{\text{Me}_2}]\cdot\text{MeCN}$  (**20**). The anisotropic displacement factor exponent takes the form:  $-2\pi^2 [h^2 a^{*2} U_{11} + \dots + 2hk a^* b^* U_{12}]$

|       | U11    | U22   | U33   | U23    | U13   | U12    |
|-------|--------|-------|-------|--------|-------|--------|
| Fe(1) | 48(1)  | 44(1) | 43(1) | 0(1)   | 18(1) | 1(1)   |
| S(1)  | 50(1)  | 57(1) | 50(1) | -7(1)  | 19(1) | -3(1)  |
| S(2)  | 50(1)  | 55(1) | 46(1) | -4(1)  | 22(1) | -7(1)  |
| S(3)  | 55(1)  | 49(1) | 55(1) | 0(1)   | 24(1) | 4(1)   |
| S(4)  | 55(5)  | 50(4) | 47(4) | 1(3)   | 19(4) | 6(3)   |
| O(1)  | 77(3)  | 74(3) | 45(2) | -2(2)  | 11(2) | -4(2)  |
| O(2)  | 57(2)  | 57(2) | 51(2) | 2(2)   | 23(2) | -11(2) |
| O(3)  | 54(2)  | 46(2) | 57(2) | 5(2)   | 30(2) | 6(2)   |
| O(4)  | 77(3)  | 49(2) | 74(2) | 4(2)   | 39(2) | 16(2)  |
| N(1)  | 50(2)  | 48(3) | 46(2) | -1(2)  | 14(2) | 2(2)   |
| N(2)  | 55(3)  | 47(2) | 42(2) | -2(2)  | 21(2) | -4(2)  |
| N(3)  | 53(2)  | 47(3) | 43(2) | -4(2)  | 18(2) | 6(2)   |
| N(4)  | 49(2)  | 46(3) | 47(2) | -5(2)  | 23(2) | -4(2)  |
| N(5)  | 101(4) | 76(4) | 78(4) | -14(3) | 35(3) | 1(3)   |
| C(1)  | 63(4)  | 72(4) | 63(4) | -5(3)  | 15(3) | -3(3)  |
| C(2)  | 79(4)  | 61(4) | 49(3) | -5(3)  | 18(3) | -4(3)  |
| C(3)  | 49(3)  | 49(3) | 52(3) | 0(2)   | 8(2)  | 5(3)   |
| C(4)  | 62(3)  | 57(4) | 47(3) | -2(3)  | 17(3) | 5(3)   |
| C(5)  | 61(3)  | 69(4) | 54(3) | 6(3)   | 21(3) | -6(3)  |
| C(6)  | 68(3)  | 50(3) | 50(3) | -1(2)  | 31(3) | 1(3)   |
| C(7)  | 55(5)  | 57(5) | 42(5) | -11(4) | 16(4) | 0(4)   |
| C(8)  | 83(4)  | 76(4) | 51(3) | 5(3)   | 37(3) | 0(3)   |
| C(9)  | 60(3)  | 67(4) | 45(3) | -3(3)  | 25(3) | -12(3) |
| C(10) | 45(3)  | 41(3) | 55(3) | 2(2)   | 23(2) | -3(2)  |
| C(11) | 51(3)  | 45(3) | 44(3) | -2(2)  | 19(2) | -5(2)  |
| C(12) | 52(3)  | 61(4) | 48(3) | 2(2)   | 21(2) | -3(3)  |
| C(13) | 56(3)  | 53(3) | 57(3) | -8(3)  | 25(3) | -7(3)  |
| C(14) | 76(4)  | 62(4) | 58(4) | 4(3)   | 22(3) | 4(3)   |
| C(15) | 97(5)  | 64(4) | 54(4) | -7(3)  | 19(3) | -4(4)  |
| C(16) | 76(4)  | 66(4) | 48(3) | -6(3)  | 20(3) | 0(3)   |
| C(17) | 61(4)  | 79(4) | 52(3) | -3(3)  | 14(3) | 11(3)  |
| C(18) | 71(4)  | 68(4) | 55(3) | -3(3)  | 27(3) | -1(3)  |
| C(19) | 74(4)  | 61(4) | 65(4) | -8(3)  | 41(3) | -3(3)  |
| C(20) | 71(4)  | 61(4) | 71(4) | 1(3)   | 25(3) | 13(3)  |
| C(21) | 55(3)  | 71(4) | 70(4) | 3(3)   | 13(3) | 14(3)  |
| C(22) | 55(3)  | 72(4) | 82(4) | -13(3) | 30(3) | -3(3)  |
| C(23) | 51(3)  | 95(5) | 91(5) | -13(4) | 22(3) | 1(3)   |
| C(24) | 74(4)  | 58(4) | 50(3) | 3(3)   | 21(3) | -2(3)  |
| C(25) | 116(5) | 84(5) | 56(4) | 7(3)   | 42(4) | 19(4)  |

|       |       |       |       |        |       |       |
|-------|-------|-------|-------|--------|-------|-------|
| C(26) | 66(4) | 67(4) | 50(3) | -2(3)  | 20(3) | 2(3)  |
| C(27) | 97(5) | 62(4) | 77(4) | 3(3)   | 38(4) | -7(4) |
| C(28) | 57(3) | 69(4) | 56(3) | -9(3)  | 25(3) | 1(3)  |
| C(29) | 61(4) | 70(4) | 69(4) | -14(3) | 29(3) | 3(3)  |
| C(30) | 69(4) | 55(4) | 70(4) | -18(3) | 32(3) | -5(3) |
| C(31) | 56(3) | 68(4) | 65(4) | -15(3) | 23(3) | -5(3) |
| C(32) | 39(9) | 36(9) | 36(9) | 2(6)   | 10(6) | -2(6) |

---

**Table S-48.** Hydrogen coordinates (  $\times 10^4$ ) and isotropic displacement parameters ( $\text{Å}^2 \times 10^3$ ) for  $(\text{Et}_4\text{N})_2[\text{Fe}^{\text{III}}(\text{tame}-\text{N}_2\text{SO}_2)\text{S}_2^{\text{Me}_2}]\cdot\text{MeCN}$  (**20**).

|        | x    | y     | z    | U(eq) |
|--------|------|-------|------|-------|
| H(1A)  | 8785 | 3245  | 4349 | 83    |
| H(1B)  | 8804 | 3352  | 3592 | 83    |
| H(1C)  | 8482 | 2551  | 3827 | 83    |
| H(2A)  | 7092 | 4212  | 4207 | 78    |
| H(2B)  | 5831 | 4245  | 3498 | 78    |
| H(2C)  | 7230 | 4430  | 3496 | 78    |
| H(5A)  | 4668 | 2544  | 4419 | 74    |
| H(5B)  | 4532 | 1754  | 4039 | 74    |
| H(7A)  | 3444 | 3510  | 3818 | 63    |
| H(7B)  | 1974 | 3380  | 3718 | 63    |
| H(8A)  | 1387 | 2146  | 3951 | 80    |
| H(8B)  | 2684 | 2411  | 4576 | 80    |
| H(8C)  | 2591 | 1586  | 4265 | 80    |
| H(9A)  | 2513 | 1374  | 3147 | 67    |
| H(9B)  | 1363 | 1959  | 2797 | 67    |
| H(12A) | 463  | 2216  | 636  | 64    |
| H(12B) | 1476 | 2642  | 395  | 64    |
| H(12C) | 1321 | 2884  | 1096 | 64    |
| H(13A) | 1466 | 977   | 643  | 65    |
| H(13B) | 3005 | 877   | 1023 | 65    |
| H(13C) | 2409 | 1382  | 339  | 65    |
| H(14A) | 6283 | 1201  | 3906 | 80    |
| H(14B) | 7558 | 968   | 3786 | 80    |
| H(15A) | 8148 | 1565  | 4861 | 90    |
| H(15B) | 8632 | 716   | 4990 | 90    |
| H(15C) | 7356 | 964   | 5106 | 90    |
| H(16A) | 6438 | 60    | 2910 | 77    |
| H(16B) | 5525 | -556  | 3041 | 77    |
| H(17A) | 4219 | 342   | 2329 | 80    |
| H(17B) | 4978 | 991   | 2858 | 80    |
| H(17C) | 4096 | 413   | 3065 | 80    |
| H(18A) | 4959 | 279   | 4160 | 77    |
| H(18B) | 6173 | -29   | 4809 | 77    |
| H(19A) | 4642 | -968  | 4503 | 75    |
| H(19B) | 5754 | -1249 | 4257 | 75    |
| H(19C) | 4431 | -914  | 3701 | 75    |
| H(20A) | 8015 | -534  | 4668 | 82    |
| H(20B) | 7327 | -993  | 3964 | 82    |
| H(21A) | 9395 | -719  | 4056 | 83    |

|        |      |      |      |    |
|--------|------|------|------|----|
| H(21B) | 9216 | 148  | 4186 | 83 |
| H(21C) | 8436 | -213 | 3438 | 83 |
| H(22A) | 6553 | 369  | 1259 | 82 |
| H(22B) | 5966 | 1080 | 1494 | 82 |
| H(23A) | 4647 | 632  | 403  | 97 |
| H(23B) | 5747 | 855  | 127  | 97 |
| H(23C) | 5035 | 1490 | 387  | 97 |
| H(24A) | 8663 | 588  | 2091 | 74 |
| H(24B) | 9422 | 1348 | 2107 | 74 |
| H(25A) | 8875 | 1245 | 3068 | 99 |
| H(25B) | 7369 | 1223 | 2568 | 99 |
| H(25C) | 8201 | 1963 | 2615 | 99 |
| H(26A) | 6761 | 2262 | 745  | 74 |
| H(26B) | 6794 | 2291 | 1514 | 74 |
| H(27A) | 8125 | 3192 | 1372 | 92 |
| H(27B) | 8942 | 2573 | 1165 | 92 |
| H(27C) | 8979 | 2599 | 1938 | 92 |
| H(28A) | 7692 | 1322 | 352  | 72 |
| H(28B) | 9092 | 1339 | 970  | 72 |
| H(29A) | 8865 | 206  | 435  | 79 |
| H(29B) | 7505 | 58   | 500  | 79 |
| H(29C) | 8822 | 55   | 1180 | 79 |
| H(31A) | 8127 | 4243 | 2441 | 76 |
| H(31B) | 8675 | 5062 | 2700 | 76 |
| H(31C) | 9591 | 4451 | 2561 | 76 |
| H(32A) | 1742 | 3334 | 3592 | 46 |
| H(32B) | 1418 | 2988 | 2842 | 46 |

---

References:

Instrument: Nonius KappaCCD Nonius (1997). KappaCCD Operations Manual, Delft.

Data Collection Software: Collect, (1998), Data Collection Software, Nonius.

Data Reduction: DENZO

Otinowski, Z., Minor, W., (1996). Processing of X-ray Diffraction Data Collected in Oscillation Mode, Methods in Enzymology, 276, 307-326.,

C. W. Carter, Jr., R. M. Sweet, Eds., Academic Press.

Cell Refinement: HKL SCALEPACK *ibid.*

Structure Solution: SIR92

Altomare, A., Cascarano, G., Giacovazzo, C., Burla, M.C.,  
Polidori, G., Camalli, M., (1994)., SIR. J. Appl. Cryst. 27,  
435-442.

Structure Refinement: SHELXL-97 (Sheldrick, 1997)

Sheldrick, G.M. (1997). SHELXL97, Program for the Refinement  
of Crystal Structures. Univ. of Gottingen, Germany.

Molecular Graphics: maXus, Zortep

maXus:

MacKay, S., Gilmore, C.J., Edwards, C., Tremayne  
M., Stewart, N., Shankland, K., (1998), "maXus:  
a computer program for the solution and refinement of  
crystal structures from diffraction data"

University of Glasgow, Scotland, UK, Nonius BV, Delft, The  
Netherlands and MacScience Co. Ltd., Yokohama, Japan.

Zortep: L. Zsolnai, G. Huttner, (1994), University of  
Heidelberg.

Absorption Correction: SORTAV

Blessing, R.H., (1995), Acta. Cryst. A51, 33.
